# Supplementary material for: A systematic study on the Cadiot–Chodkiewicz cross coupling reaction for the selective and efficient synthesis of hetero-diynes
Source: Royal Society of Chemistry journal article supplement (doi:10.1039/c6ra07308e), 2016-01-01

***Electronic Supplementary Information for***  
**A Systematic Study on Cadiot–Chodkiewicz Cross Coupling Reaction for  
Selective and Efficient Synthesis of hetero-diyne**

Bhavani Shankar Chinta, and Beeraiah Baire\*

Department of Chemistry, Indian Institute of Technology Madras, Chennai, Tamilnadu, INDIA-600036.

\*E-mail: beeru@iitm.ac.in

|                                                                                       |              |
|---------------------------------------------------------------------------------------|--------------|
| Experimental Procedures and spectroscopic data for all new compounds                  | <b>2-19</b>  |
| References                                                                            | <b>20</b>    |
| Copy of each <sup>1</sup> H-NMR and <sup>13</sup> C-NMR spectra for all new compounds | <b>21-51</b> |

**General Procedures for Cadiot-Chodkiewicz Coupling: Method A**

To the solution of propargylic alkynyl bromide (1 eq.) and alkyne (1.1 eq.) in freshly degased amine (5 eq) and degased tap water or 1,2-dichloroethane (2 mL/0.1 mmol) at 0 °C under nitrogen atmosphere, was added CuCl (0.1 eq.) and stirred the reaction mixture at same temperature until consumption of starting propargyl alcohol (15 min to few hours). Reaction mixture was diluted with EtOAc (10 mL/0.2 mmol), saturated aq. NH<sub>4</sub>Cl (10 mL) and extracted thrice with ethyl acetate (3 x 10 mL). The combined organic layer was washed with brine (10 mL) and dried over MgSO<sub>4</sub>. Evaporation of the solvent and purification of the crude mixture by column chromatography (4:1, hexane:ethyl acetate) afforded the corresponding coupled heterodiyne.

**Method-B**

To the solution of propargyl alcohol (1 eq.), and alkyne bromide (1.1 eq.), in freshly degased amine (5 eq) and degased tap water or 1,2-dichloroethane (2 mL/0.1 mmol) at 0 °C under nitrogen atmosphere, was added CuCl (0.1 eq.) and stirred the reaction mixture at same temperature until consumption of starting propargyl alcohol (15 min to few hours). Reaction mixture was diluted with EtOAc (10 mL/0.2 mmol), saturated aq. NH<sub>4</sub>Cl (10 mL) and extracted thrice with ethyl acetate (3 x 10 mL). The combined organic layer was washed with brine (10 mL) and dried over MgSO<sub>4</sub>. Evaporation of the solvent and purification of the crude mixture by column chromatography (4:1, hexane:ethyl acetate) afforded the corresponding coupled heterodiyne.

**1-(Phenylbuta-1,3-diyne-1-yl)cyclohexan-1-ol (2)**

Followed method-A. 1-(bromoethynyl)cyclohexan-1-ol **1** (40 mg, 0.20 mmol), phenylacetylene (22 mg, 0.22 mmol), freshly degassed piperidine (0.1 mL) and tap water (4 mL), CuCl (2 mg, 0.02 mmol) stirred for 30 min at 0 °C. Purification by flash column chromatography (9:1 hexane:EtOAc) gave the heterodiyne **2** (36 mg, 0.16 mmol, 82%) as a white solid.

<sup>1</sup>H NMR (400 MHz, CDCl<sub>3</sub>): δ = 7.40 (2 H, dd, *J* = 1.4 & 7.9 Hz), 7.20-7.27 (3 H, m), 2.15 (1 H, br s), 1.87-1.91 (2 H, m), 1.48-1.87 (6 H, m), 1.18-1.21 (2 H, m).

<sup>13</sup>C NMR (100 MHz, CDCl<sub>3</sub>): δ = 132.6, 129.3, 128.5, 121.7, 86.3, 78.6, 73.5, 69.4, 69.0, 39.8, 25.1 and 23.2 ppm.

IR (neat): 3438, 3054, 2986, 2939, 2859, 1733, 1599, 1488, 1445, 1422, 1373, 1341, 1265, 1158, 1053, 962, 898, 744, 705, 540, 497 and 441 cm<sup>-1</sup>.

TLC: R<sub>f</sub> = 0.5 (4:1, Hex/EtOAc).

HR ESI-MS: [C<sub>16</sub>H<sub>16</sub>ONa]<sup>+</sup> = [M+Na]<sup>+</sup> requires 247.1099; found 247.1092

M.P.: 96-98 °C.

**1-(5-Hydroxy-5-phenylhexa-1,3-diyne-1-yl)cyclohexan-1-ol (4)**

Followed method-A. 1-(bromoethynyl)cyclohexan-1-ol **1** (40 mg, 0.20 mmol), 2-phenylbut-3-yn-2-ol (32 mg, 0.22 mmol), freshly degassed piperidine (0.1 mL) and tap water (4 mL), CuCl (2 mg, 0.02 mmol) stirred for 30 min at 0 °C. Purification by flash column chromatography (9:1 hexane:EtOAc) gave the heterodiyne **4** (38 mg, 0.14 mmol, 72%) as a white solid.

<sup>1</sup>H NMR (400 MHz, CDCl<sub>3</sub>): δ = 7.60-7.62 (2 H, m), 7.36 (1 H, ddd, *J* = 1.2, 3.0 & 6.8 Hz), 7.30 (1 H, ddd, *J* = 1.4, 2.7 & 6.4 Hz), 2.59 (1 H, br s), 2.13 (1 H, br s), 1.91-1.94 (2 H, m), 1.51-1.71 (8 H, m).

<sup>13</sup>C NMR (100 MHz, CDCl<sub>3</sub>): δ = 144.7, 128.5, 128.1, 124.9, 84.1, 82.3, 70.5, 69.3, 69.2, 68.3, 39.7, 32.7, 32.9, 25.1 and 23.2 ppm.

IR (neat): 3410, 2983, 2935, 2858, 1658, 1627, 1464, 1447, 1404, 1245, 1156, 1056, 963, 899, 763, 698, 616, 593, 566, 495, 480, 460 and 429 cm<sup>-1</sup>.

HR ESI-MS: [C<sub>18</sub>H<sub>21</sub>O<sub>2</sub>]<sup>+</sup> = [M+H]<sup>+</sup> requires 269.1542; found 269.1541.

TLC:  $R_f = 0.5$  (4:1, Hex/EtOAc).

M.P.: 79-81 °C.

### **1-(5-Hydroxy-5-methylhexa-1,3-diyne-1-yl)cyclohexan-1-ol (5)**

Followed method-A. 1-(bromoethynyl)cyclohexan-1-ol **1** (40 mg, 0.20 mmol), 2-methylbut-3-yn-2-ol (18 mg, 0.22 mmol), freshly degassed piperidine (0.1 mL) and tap water (4 mL), CuCl (2 mg, 0.02 mmol) stirred for 30 min at 0 °C. Purification by flash column chromatography (9:1 hexane:EtOAc) gave the heterodiyne **5** (34 mg, 0.17 mmol, 84%) as a white solid.

$^1\text{H NMR}$  (400 MHz,  $\text{CDCl}_3$ ):  $\delta = 2.00$  (1 H, br s), 1.90-1.93 (2 H, m), 1.66-1.71 (2 H, m), 1.57-1.62 (6 H, m), 1.53 (6 H, s), 1.24-1.26 (1 H, m).

$^{13}\text{C NMR}$  (100 MHz,  $\text{CDCl}_3$ ):  $\delta = 83.8, 83.4, 69.3, 68.3, 66.6, 65.6, 39.7, 31.1, 25.1$  and 23.2 ppm.

IR (neat): 3437, 2937, 2855, 1659, 1627, 1549, 1531, 1479, 1405, 1260, 1122, 1048, 878, 748, 649, 574, 537, 486, 462 and 418  $\text{cm}^{-1}$ .

TLC:  $R_f = 0.5$  (4:1, Hex/EtOAc).

HR ESI-MS:  $[\text{C}_{13}\text{H}_{18}\text{O}_2\text{K}]^+ = [\text{M}+\text{K}]^+$  requires 245.0944; found 245.0959

M.P.: 124-126 °C.

### ***N*-[5-(1-Hydroxycyclohexyl)penta-2,4-diyne-1-yl]-4-methylbenzenesulfonamide (6)**

Followed method-A. 1-(bromoethynyl)cyclohexan-1-ol **1** (40 mg, 0.20 mmol), 4-methyl-*N*-(prop-2-yn-1-yl)benzenesulfonamide<sup>2</sup> (45 mg, 0.22 mmol), freshly degassed piperidine (0.1 mL) and tap water (4 mL), CuCl (2 mg, 0.02 mmol) stirred for 30 min at 0 °C. Purification by flash column chromatography (9:1 hexane:EtOAc) gave the heterodiyne **6** (56 mg, 0.17 mmol, 86%) as a yellow oil.

$^1\text{H NMR}$  (400 MHz,  $\text{CDCl}_3$ ):  $\delta = 7.27$  (2 H, d,  $J = 8.3$  Hz), 7.32 (2 H, d,  $J = 8.0$  Hz), 5.07 (1 H, t,  $J = 5.8$  Hz), 3.91 (2 H, d,  $J = 6.2$  Hz), 2.43 (3 H, s), 2.33 (1 H, br s), 1.85-1.88 (2 H, m), 1.66-1.70 (2 H, m), 1.44-1.59 (5 H, m), 1.23- 1.27 (1 H, m).

$^{13}\text{C NMR}$  (100 MHz,  $\text{CDCl}_3$ ):  $\delta = 144.0, 136.5, 129.8, 127.5, 82.7, 73.7, 69.1, 68.9, 68.0, 39.6, 33.6, 25.0, 23.1$  and 21.6 ppm.

IR (neat): 3575, 3371, 3055, 2986, 2938, 2859, 1731, 1658, 1598, 1447, 1422, 1375, 1334, 1265, 1161, 1092, 1059, 897, 812, 742, 705, 665, 553, 514, 469 and 405  $\text{cm}^{-1}$ .

HR ESI-MS:  $[\text{C}_{18}\text{H}_{22}\text{NO}_3\text{S}]^+ = [\text{M}+\text{H}]^+$  requires 332.1320; found 332.1318.

TLC:  $R_f = 0.5$  (4:1, Hex/EtOAc).

M.P.: 118-120  $^{\circ}\text{C}$ .

### **1-(5-Hydroxy-7-phenylhepta-1,3-diyne-1-yl)cyclohexan-1-ol (7)**

Followed method-A. 1-(bromoethynyl)cyclohexan-1-ol **1** (40 mg, 0.20 mmol), 5-phenylpent-1-yn-3-ol<sup>3</sup> (46 mg, 0.22 mmol), freshly degassed piperidine (0.1 mL) and tap water (4 mL), CuCl (2 mg, 0.02 mmol) stirred for 30 min at  $0^{\circ}\text{C}$ . Purification by flash column chromatography (9:1 hexane:EtOAc) gave the heterodiyne **7** (50 mg, 0.177 mmol, 89%) as a light yellow solid.

$^1\text{H}$ NMR (400 MHz,  $\text{CDCl}_3$ ):  $\delta = 7.27$  (2 H, d,  $J = 6.7$  Hz), 7.16-7.20 (3 H, m), 4.40 (1 H, t,  $J = 6.6$  Hz), 2.78 (2H, t,  $J = 3.7$  Hz), 2.45 (1 H, br s), 2.00-2.70 (2 H, m), 1.89-1.93 (2 H, m), 1.48-1.62 (5 H, m), 1.22-1.25 (1 H, m).

$^{13}\text{C}$  NMR (100 MHz,  $\text{CDCl}_3$ ):  $\delta = 141.0, 140.9, 128.5, 126.2, 83.4, 80.1, 69.5, 69.3, 68.3, 62.1, 62.0, 39.7, 38.9, 31.3, 25.0$  and  $23.2$  ppm.

IR (neat): 3425, 3090, 3061, 3027, 2936, 2858, 1724, 1706, 1655, 1602, 1450, 1404, 1329, 1262, 1151, 1054, 963, 742, 700, 585, 537, 498, 462, 439 and 404  $\text{cm}^{-1}$ .

HR ESI-MS:  $[\text{C}_{19}\text{H}_{23}\text{O}]^+ = [\text{M}+\text{H}]^+$  requires 283.1698; found 283.1696.

TLC:  $R_f = 0.5$  (4:1, Hex/EtOAc).

M.P.: 84-86  $^{\circ}\text{C}$ .

### **1-[5-(Benzyloxy)penta-1,3-diyne-1-yl]cyclohexan-1-ol (8)**

Followed method-A. 1-(bromoethynyl)cyclohexan-1-ol **1** (40 mg, 0.20 mmol), [(prop-2-ynyloxy)methyl]benzene<sup>4</sup> (32 mg, 0.22 mmol), freshly degassed piperidine (0.1 mL) and tap water (4 mL), CuCl (2 mg, 0.02 mmol) stirred for 30 min at  $0^{\circ}\text{C}$ . Purification by flash column chromatography (9:1 hexane:EtOAc) gave the heterodiyne **8** (50 mg, 0.19 mmol, 95%) as a yellow oil.

$^1\text{H}$ NMR (400 MHz,  $\text{CDCl}_3$ ):  $\delta$  = 7.29-7.35 (5 H, m), 4.60 (2 H, s), 4.23 (2 H, s), 2.30 (1 H, br s), 1.91-1.94 (2 H, m), 1.66-1.71 (2 H, m), 1.50-1.62 (5 H, m), 1.23-1.25 (1 H, m).

$^{13}\text{C}$  NMR (100 MHz,  $\text{CDCl}_3$ ):  $\delta$  = 137.1, 128.5, 128.2, 128.1, 82.8, 75.0, 71.8, 70.7, 69.2, 68.4, 57.6, 39.6, 25.0 and 23.1.

IR (neat): 3428, 3302, 3055, 2938, 2858, 1724, 1659, 1627, 1495, 1451, 1380, 1350, 1265, 1208, 1149, 1073, 1028, 964, 903, 852, 700, 634, 605, 450 and  $401\text{cm}^{-1}$ .

HR ESI-MS:  $[\text{C}_{18}\text{H}_{20}\text{O}_2\text{Na}]^+ = [\text{M}+\text{Na}]^+$  requires 291.1361; found 291.1371

TLC:  $R_f$  = 0.5 (4:1, Hex/EtOAc).

### **1-(6-Hydroxyhexa-1,3-diyne-1-yl)cyclohexan-1-ol (9)**

Followed method-A. 1-(bromoethynyl)cyclohexan-1-ol **1** (40 mg, 0.20 mmol), 3-butyne 1-ol (15 mg, 0.22 mmol), freshly degassed piperidine (0.1 mL) and tap water (4 mL), CuCl (2 mg, 0.02 mmol) stirred for 30 min at 0 °C. Purification by flash column chromatography (9:1 hexane:EtOAc) gave the heterodiyne **9** (31 mg, 0.16 mmol, 82%) as a yellow oil.

$^1\text{H}$ NMR (400 MHz,  $\text{CDCl}_3$ ):  $\delta$  = 3.75 (2 H, t,  $J$  = 6.3 Hz), 2.56 (2 H, t,  $J$  = 6.3 Hz), 2.52 (1 H, br s), 1.89-1.93 (2 H, m), 1.67-1.71 (2 H, m), 1.51-1.61 (6 H, m).

$^{13}\text{C}$  NMR (100 MHz,  $\text{CDCl}_3$ ):  $\delta$  = 80.0, 78.0, 69.2, 68.9, 66.3, 60.7, 39.7, 25.1, 23.7 and 23.2. IR (neat): 3429, 3055, 2986, 2938, 2859, 1732, 1630, 1446, 1422, 1375, 1265, 1046, 961, 896, 745, 706 and  $418\text{cm}^{-1}$ .

TLC:  $R_f$  = 0.5 (4:1, Hex/EtOAc).

### **6-(1-Hydroxycyclohexyl)hexa-3,5-diyne-1-yl 4-methylbenzenesulfonate (10)**

Followed method-A. 1-(bromoethynyl)cyclohexan-1-ol **1** (40 mg, 0.20 mmol), but-3-yn-1-yl 4-methylbenzenesulfonate<sup>5</sup> (48 mg, 0.22 mmol), freshly degassed piperidine (0.1 mL) and tap water (4 mL), CuCl (2 mg, 0.02 mmol) stirred for 30 min at 0 °C. Purification by flash column chromatography (9:1 hexane:EtOAc) gave the heterodiyne **10** (55 mg, 0.16 mmol, 81%) as a light yellow solid.

$^1\text{H}$ NMR (400 MHz,  $\text{CDCl}_3$ ):  $\delta$  = 7.80 (2 H, d,  $J$  = 8.3 Hz), 7.36 (2 H, d,  $J$  = 8.0 Hz), 4.08 (2 H, t,  $J$  = 6.9 Hz), 2.65 (2 H, t,  $J$  = 6.9 Hz), 2.45 (3 H, s), 2.08 (1 H, br s), 1.88-1.91 (2 H, m), 1.65-1.71 (2 H, m), 1.47-1.61 (5 H, m), 1.22-1.26 (1 H, m).

$^{13}\text{C}$  NMR (100 MHz,  $\text{CDCl}_3$ ):  $\delta$  = 145.2, 132.8, 130.0, 128.1, 80.6, 74.9, 69.1, 68.6, 67.0, 66.9, 39.8, 25.1, 23.2, 21.7 and 20.4.

IR (neat): 3435, 3055, 2986, 2939, 2865, 1732, 1655, 1627, 1464, 1447, 1423, 1369, 1265, 1178, 1117, 1099, 1046, 896, 735, 705, 554, 490, 448, 430 and  $411\text{ cm}^{-1}$ .

TLC:  $R_f$  = 0.5 (4:1, Hex/EtOAc).

HR ESI-MS:  $[\text{C}_{19}\text{H}_{22}\text{O}_4\text{NaS}]^+ = [\text{M}+\text{Na}]^+$  requires 369.1137; found 369.1148

M.P.: 108-110 °C.

### **1-(Cyclohex-1-en-1-ylbuta-1,3-diyne-1-yl)-4-methoxybenzene (11)**

Followed method-A. 1-(bromoethynyl)cyclohex-1-ene<sup>6</sup> (40 mg, 0.22 mmol), 1-ethynyl-4-methoxybenzene (32 mg, 0.24 mmol), freshly degassed piperidine (0.1 mL) and tap water (4 mL), CuCl (2 mg, 0.02 mmol) stirred for 30 min at 0 °C. Purification by flash column chromatography (19:1 hexane:EtOAc) gave the heterodiyne **11** (34 mg, 0.156 mmol, 72%) as a green solid.

$^1\text{H}$ NMR (400 MHz,  $\text{CDCl}_3$ ):  $\delta$  = 7.41 (2 H, d,  $J$  = 8.9 Hz), 6.83 (2 H, d,  $J$  = 8.9 Hz), 6.28-6.30 (1 H, m), 3.80 (3 H, s), 2.12-2.16 (4 H, m), 1.59-1.65 (4 H, m).

$^{13}\text{C}$  NMR (100 MHz,  $\text{CDCl}_3$ ):  $\delta$  = 160.2, 138.6, 134.0, 119.9, 116.4, 114.1, 83.3, 80.8, 73.0, 71.6, 55.4, 28.7, 26.0, 22.2 and 21.4.

IR (neat): 3005, 2930, 2858, 2837, 1642, 1601, 1507, 1437, 1347, 1289, 1248, 1176, 1136, 1108, 1075, 1031, 918, 833, 801, 739, 693, 650, 609, 582, 549, 535, 507 and  $479\text{ cm}^{-1}$ .

HR ESI-MS:  $[\text{C}_{17}\text{H}_{17}\text{O}]^+ = [\text{M}+\text{H}]^+$  requires 237.1279; found 237.1278.

TLC:  $R_f$  = 0.6 (19:1, Hex/EtOAc).

M.P.: 54-56 °C.

### **1-{6-[(*tert*-Butyldimethylsilyl)oxy]hexa-1,3-diyne-1-yl}cyclohexan-1-ol (12)**

Followed method-A. 1-(bromoethynyl)cyclohexan-1-ol **1** (40 mg, 0.20 mmol), (but-3-yn-1-yloxy)(*tert*-butyl)dimethylsilane<sup>7</sup> (40 mg, 0.22 mmol), freshly degassed piperidene (0.1 mL) and tap water (4 mL), CuCl (2 mg, 0.02 mmol) stirred for 30 min at 0 °C. Purification by flash column chromatography (9:1 hexane:EtOAc) gave the heterodiyne **12** (55 mg, 0.18 mmol, 91%) as a yellow oil, along with known homodimer<sup>8</sup> **3** (2 mg, 0.008 mmol, 3%) as a light yellow solid.

<sup>1</sup>HNMR (400 MHz, CDCl<sub>3</sub>): δ = 3.67 (2 H, t, *J* = 7.1 Hz), 2.42 (2 H, t, *J* = 7.0 Hz), 2.01 (1 H, br s), 1.81-1.85 (2 H, m), 1.59-1.63 (2 H, m), 1.44-1.50 (5 H, m), 1.13-1.18 (1 H, m), 0.82 (9 H, s), -0.01 (6 H, s).

<sup>13</sup>C NMR (100 MHz, CDCl<sub>3</sub>): δ = 79.6, 78.5, 69.4, 69.2, 65.8, 61.5, 39.9, 25.9, 25.1, 23.8, 23.2, 18.4 and -5.1 ppm.

IR (neat): 3411, 2934, 2857, 1723, 1627, 1466, 1448, 1386, 1344, 1256, 1108, 1063, 965, 905, 836, 779, 731, 664, 545, 495, 442, 424 and 410 cm<sup>-1</sup>.

HR ESI-MS: [C<sub>18</sub>H<sub>30</sub>O<sub>2</sub>NaSi]<sup>+</sup> = [M+Na]<sup>+</sup> requires 329.1913; found 329.1911

TLC: R<sub>f</sub> = 0.5 (4:1, Hex/EtOAc).

### 1-(Octa-1,3-diyn-1-yl)cyclohexan-1-ol (**13**)

Followed method-A. 1-(bromoethynyl)cyclohexan-1-ol **1** (40 mg, 0.20 mmol), 1-hexyne (18 mg, 0.22 mmol), freshly degassed piperidene (0.1 mL) and tap water (4 mL), CuCl (2 mg, 0.02 mmol) stirred for 30 min at 0 °C. Purification by flash column chromatography (9:1 hexane:EtOAc) gave the heterodiyne **13** (32 mg, 0.16 mmol, 80 %) as a yellow oil, along with homodimer (3 mg, 0.01 mmol, 5%) as a white solid.

<sup>1</sup>HNMR (400 MHz, CDCl<sub>3</sub>): δ = 2.28 (1 H, t, *J* = 6.9 Hz), 2.08 (1 H, br s), 1.86-1.92 (2 H, m), 1.39-1.61 (10 H, m), 1.25-1.28 (2 H, m), 0.91 (2 H, t, *J* = 7.3 Hz).

<sup>13</sup>C NMR (100 MHz, CDCl<sub>3</sub>): δ = 83.8, 81.6, 79.2, 69.9, 69.2, 39.8, 30.3, 25.1, 23.27, 23.24, 22.0, 19.0 and 13.6.

IR (neat): 3428, 3054, 2985, 2940, 2867, 1732, 1667, 1423, 1375, 1265, 1046, 895, 739, 705 and 417 cm<sup>-1</sup>.

HR ESI-MS: [C<sub>14</sub>H<sub>20</sub>OK]<sup>+</sup> = [M+K]<sup>+</sup> requires 243.1151; found 243.1155



TLC:  $R_f = 0.5$  (4:1, Hex/EtOAc).

**(Cyclohex-1-en-1-ylbuta-1,3-diyne-1-yl)benzene (14)**

Followed method-A. 1-(bromoethynyl)cyclohex-1-ene (40 mg, 0.22 mmol), phenyl acetylene (22 mg, 0.24 mmol), freshly degassed piperidene (0.1 mL) and tap water (4 mL), CuCl (2 mg, 0.02 mmol) stirred for 30 min at 0 °C. Purification by flash column chromatography (19:1 hexane:EtOAc) gave the heterodiyne **14** (35 mg, 0.17 mmol, 77%) as a yellow oil, along with homodimer (3%) as a white solid.

$^1\text{H NMR}$  (400 MHz,  $\text{CDCl}_3$ ):  $\delta = 7.47$  (2 H, dd,  $J = 1.6$  & 7.6 Hz), 7.28-7.35 (3 H, m), 6.30-6.34 (1 H, m), 2.12 to 2.17 (4 H, m), 1.57-1.66 (4 H, m).

$^{13}\text{C NMR}$  (100 MHz,  $\text{CDCl}_3$ ):  $\delta = 139.0, 132.6, 129.0, 128.5, 122.3, 119.9, 83.9, 80.6, 76.8, 71.5, 28.7, 26.0, 22.2$  and 21.4.

IR (neat): 3056, 2987, 2939, 1730, 1656, 1439, 1412, 1370, 1269, 1041, 892, 739, 521, 496 and 432  $\text{cm}^{-1}$ .

HR ESI-MS:  $[\text{C}_{16}\text{H}_{15}]^+ = [\text{M}+\text{H}]^+$  requires 207.1174: found 207.1173.

TLC:  $R_f = 0.6$  (19:1, Hex/EtOAc).

**1-(Octa-1,3-diyne-1-yl)cyclohex-1-ene (15)**

Followed method-A. 1-(bromoethynyl)cyclohex-1-ene (40 mg, 0.22 mmol), 1-hexyne (20 mg, 0.24 mmol), freshly degassed piperidene (0.1 mL) and tap water (4 mL), CuCl (2 mg, 0.02 mmol) stirred for 30 min at 0 °C. Purification by flash column chromatography (19:1 hexane:EtOAc) gave the heterodiyne **15** (28 mg, 0.150 mmol, 69%) as a yellow oil, along with homodimer (3%) as a white solid.

$^1\text{H NMR}$  (400 MHz,  $\text{CDCl}_3$ ):  $\delta = 6.22$ -6.24 (1 H, m), 2.31 (1 H, t,  $J = 6.8$  Hz), 2.09-2.11 (4 H, m), 1.39-1.63 (8 H, m), 0.90 (2 H, t,  $J = 7.3$  Hz).

$^{13}\text{C NMR}$  (100 MHz,  $\text{CDCl}_3$ ):  $\delta = 138.0, 119.9, 83.7, 82.8, 71.8, 65.2, 30.4, 28.8, 26.0, 25.9, 22.2, 22.0, 21.4$  and 19.3.

IR (neat): 3054, 2985, 2940, 2867, 1732, 1667, 1423, 1375, 1265, 1046, 895, 739, 705 and 417  $\text{cm}^{-1}$ .

HR ESI-MS:  $[C_{14}H_{19}]^+ = [M+H]^+$  requires 187.1487; found 187.1510

TLC:  $R_f = 0.6$  (19:1, Hex/EtOAc).

### **1-[(Trimethylsilyl)buta-1,3-diyn-1-yl]cyclohexan-1-ol (16)**

Followed method-A. 1-(bromoethynyl)cyclohexan-1-ol **1** (40 mg, 0.20 mmol), TMS-acetylene (21 mg, 0.22 mmol), freshly degassed piperidine (0.1 mL) and 1,2 DCE (4 mL), CuCl (2 mg, 0.02 mmol) stirred for 30 min at 0 °C. Purification by flash column chromatography (9:1 hexane:EtOAc) gave the homodiyne **3** (42 mg, 0.170 mmol, 87%) as a pale white solid.

### **1-Phenyltetradeca-1,3-diyn-5-ol (18)**

Followed method-B. Propargyl alcohol<sup>9</sup> (40 mg, 0.22 mmol), phenylacetylene-bromide<sup>10</sup> (44 mg, 0.24 mmol), freshly degassed piperidine (0.1 mL) and tap water (4 mL), CuCl (2 mg, 0.02 mmol) were taken in a R.B. flask and stirred for 30 min at 0 °C. Purification by flash column chromatography (9:1 hexane:EtOAc) gave the cross coupled heterodiyne **18** (45 mg, 0.16 mmol, 73%) as a yellow oil, along with homodimer-diol **24** (3 mg, 0.01 mmol, 5%) as a light yellow solid.

<sup>1</sup>H NMR (400 MHz, CDCl<sub>3</sub>):  $\delta = 7.48$  (2 H, dd,  $J = 1.4$  & 8.0 Hz), 7.28-7.37 (3 H, m), 4.49 (1 H, t,  $J = 6.1$  Hz), 2.07 (1 H, br s), 1.72-1.79 (2 H, m), 1.44-1.51 (2 H, m), 1.27-1.30 (12 H, m), 0.87 (3 H, t,  $J = 6.7$  Hz).

<sup>13</sup>C NMR (100 MHz, CDCl<sub>3</sub>):  $\delta = 132.6, 129.3, 128.5, 121.6, 83.6, 78.6, 73.4, 69.6, 63.2, 37.7, 32.0, 29.6, 29.4, 29.38, 29.34, 25.2, 22.8$  and 14.2.

IR (neat): 3430, 2925, 2855, 1704, 1641, 1462, 1403, 1262, 1045, 1024, 755, 689, 621, 522, 469 and 422 cm<sup>-1</sup>.

HR ESI-MS:  $[C_{20}H_{26}ONa]^+ = [M+K]^+$  requires 305.1881; found 305.1909

TLC:  $R_f = 0.5$  (4:1, Hex-EtOAc).

### **N-(6-Hydroxypentadeca-2,4-diyn-1-yl)-4-methylbenzenesulfonamide (19)**

Followed method-B. Propargyl alcohol (40 mg, 0.22 mmol), N-(3-bromoprop-2-yn-1-yl)-4-methylbenzenesulfonamide (55 mg, 0.24 mmol), freshly degassed piperidine (0.1 mL) and tap water (4 mL), CuCl (2 mg, 0.02 mmol) stirred for 30 min at 0 °C. Purification by flash column

chromatography (9:1 hexane:EtOAc) gave the heterodiyne **19** (55 mg, 0.14 mmol, 65%) as a yellow oil, along with the homodimer diol **24** (4 mg, 0.01 mmol, 5%) as a light yellow solid.

$^1\text{H NMR}$  (400 MHz,  $\text{CDCl}_3$ ):  $\delta$  = 7.76 (2 H, d,  $J$  = 8.2 Hz), 7.31 (2 H, d,  $J$  = 7.9 Hz), 5.09 (1 H, br s), 4.36 (1 H, t,  $J$  = 6.6 Hz), 3.89 (2 H, s), 2.43 (3 H, s), 2.42 (1 H, br s), 1.63-1.68 (2 H, m), 1.38-1.41 (2 H, m), 1.26 (12 H, m), 0.87 (3 H, t,  $J$  = 6.6 Hz);

$^{13}\text{C NMR}$  (100 MHz,  $\text{CDCl}_3$ ):  $\delta$  = 144.0, 136.4, 129.8, 127.5, 80.2, 73.8, 68.8, 68.5, 62.7, 37.5, 33.6, 31.9, 29.7, 29.6, 29.4, 29.3, 25.1, 22.7, 21.6 and 14.2.

IR (neat): 3431, 3382, 3054, 2986, 2928, 2857, 1732, 1600, 1461, 1422, 1375, 1338, 1265, 1162, 1092, 1047, 895, 812, 740, 705, 549, 458, 421  $\text{cm}^{-1}$ .

HR ESI-MS:  $[\text{C}_{22}\text{H}_{32}\text{NO}_3\text{S}]^+ = [\text{M}+\text{H}]^+$  requires 390.2103; found 390.2103.

TLC:  $R_f$  = 0.5 (4:1, Hex-EtOAc)

### **1-(Benzyloxy)pentadeca-2,4-diyne-6-ol (20)**

Followed method-B. Propargyl alcohol (40 mg, 0.22 mmol),  $\{[(3\text{-bromoprop-2-yn-1-yl})\text{oxy}]\text{methyl}\}$ benzene<sup>6</sup> (54 mg, 0.24 mmol), freshly degassed piperidine (0.1 mL) and tap water (4 mL), CuCl (2 mg, 0.02 mmol) stirred for 30 min at 0 °C. Purification by flash column chromatography (9:1 hexane:EtOAc) gave the heterodiyne **20** (48 mg, 0.15 mmol, 67%) as a yellow oil.

$^1\text{H NMR}$  (400 MHz,  $\text{CDCl}_3$ ):  $\delta$  = 7.29-7.35 (5 H, m), 4.59 (2 H, s), 4.42 (1 H, t,  $J$  = 6.3 Hz), 4.23 (2 H, s), 2.00 (1 H, br s), 1.67-1.73 (2 H, m), 1.43-1.46 (2 H, m), 1.26 (12 H, m), 0.86-0.89 (3 H, t,  $J$  = 6.6 Hz).

$^{13}\text{C NMR}$  (100 MHz,  $\text{CDCl}_3$ ):  $\delta$  = 137.1, 128.6, 128.1, 80.3, 75.8, 72.9, 71.9, 70.7, 62.9, 57.6, 37.6, 32.0, 29.6, 29.5, 29.4, 29.3, 25.1, 22.7 and 14.2 .

IR (neat): 3446, 3304, 3054, 2985, 2928, 2856, 1733, 1652, 1605, 1455, 1423, 1375, 1353, 1265, 1073, 1046, 896, 741, 706, 608 and 459  $\text{cm}^{-1}$ .

HR ESI-MS:  $[\text{C}_{22}\text{H}_{30}\text{O}_2\text{K}]^+ = [\text{M}+\text{K}]^+$  requires 365.1883; found 365.1909

TLC:  $R_f$  = 0.5 (4:1, Hex/EtOAc)

### **1-(4-Chlorophenyl)pentadeca-2,4-diyne-1,6-diol (21)**

Followed method-B. Propargyl alcohol (40 mg, 0.22 mmol), 3-bromo-1-(4-chlorophenyl) prop-2-yn-1-ol<sup>11</sup> (59 mg, 0.24 mmol), freshly degassed piperidine (0.1 mL) and tap water (4 mL), CuCl (2 mg, 0.02 mmol) stirred for 30 min at 0 °C. Purification by flash column chromatography (9:1 hexane:EtOAc) gave the heterodiyne **21** (60 mg, 0.173 mmol, 79%) as a yellow oil.

<sup>1</sup>H NMR (400 MHz, CDCl<sub>3</sub>): δ = 7.43 (2 H, d, *J* = 8.4 Hz), 7.34 (2 H, d, *J* = 8.5 Hz), 5.48 (1 H, s), 4.41 (1 H, t, *J* = 6.6 Hz), 2.93 (1 H, br s), 2.30 (1 H, br s), 1.68-1.71 (2 H, m), 1.40-1.43 (2 H, m), 1.26 (12 H, m), 0.87 (3 H, t, *J* = 6.5 Hz).

<sup>13</sup>C NMR (100 MHz, CDCl<sub>3</sub>): δ = 138.1, 134.6, 128.9, 128.1, 81.7, 78.4, 70.9, 68.7, 64.2, 62.9, 37.5, 31.9, 63.2, 29.4, 25.1, 22.7 and 14.2.

IR (neat): 3427, 3054, 2927, 2856, 1731, 1642, 1591, 1488, 1463, 1402, 1375, 1266, 1091, 1045, 1014, 842, 793, 740, 705, 636, 600, 514 and 438 cm<sup>-1</sup>.

HR ESI-MS: [C<sub>21</sub>H<sub>28</sub>ClO<sub>2</sub>]<sup>+</sup> = [M+H]<sup>+</sup> requires 347.1778: found 347.1774.

TLC: R<sub>f</sub> = 0.5 (4:1, Hex/EtOAc)

### **2-Phenylhexadeca-3,5-diyne-2,7-diol (22)**

Followed method-B. Propargyl alcohol (40 mg, 0.22 mmol), 4-bromo-2-phenylbut-3-yn-2-ol<sup>12</sup> (54 mg, 0.24 mmol), freshly degassed piperidine (0.1 mL) and tap water (4 mL), CuCl (2 mg, 0.02 mmol) stirred for 30 min at 0 °C. Purification by flash column chromatography (9:1 hexane:EtOAc) gave the heterodiyne **22** (50 mg, 0.153 mmol, 70%) as a yellow oil.

<sup>1</sup>H NMR (400 MHz, CDCl<sub>3</sub>): δ = 7.53 (2 H, dd, *J* = 7.5 Hz), 7.28 (2 H, t, *J* = 7.1 Hz), 7.22 (1 H, t, *J* = 7.2 Hz), 4.35 (1 H, t, *J* = 6.6 Hz), 2.70 (1 H, br s), 2.12 (1 H, br s), 1.70 (3 H, s), 1.60-1.66 (2 H, m), 1.34-1.38 (2 H, m), 1.19-1.21 (12 H, m), 0.79-0.82 (3 H, t, *J* = 6.5 Hz).

<sup>13</sup>C NMR (100 MHz, CDCl<sub>3</sub>): δ = 144.6, 128.5, 128.1, 124.9, 82.4, 81.5, 70.5, 69.1, 68.9, 63.0, 37.6, 32.9, 32.0, 29.7, 29.6, 29.4, 29.4, 29.3, 25.1, 22.7 and 14.2.

IR (neat): 3417, 2926, 2855, 1630, 1598, 1462, 1402, 1260, 1202, 1122, 1084, 1040, 935, 802, 763, 699, 656, 596, 547, 517, 473 and 427 cm<sup>-1</sup>.

HR ESI-MS: [C<sub>22</sub>H<sub>31</sub>O<sub>2</sub>]<sup>+</sup> = [M+H]<sup>+</sup> requires 327.2324: found 327.2324.

TLC: R<sub>f</sub> = 0.5 (4:1, Hex/EtOAc).

**2-Methylhexadeca-3,5-diyne-2,7-diol (23)**

Followed method-B. Propargyl alcohol (40 mg, 0.22 mmol), 4-bromo-2-methylbut-3-yn-2-ol<sup>13</sup> (38 mg, 0.24 mmol), freshly degassed piperidine (0.1 mL) and tap water (4 mL), CuCl (2 mg, 0.02 mmol) stirred for 30 min at 0 °C. Purification by flash column chromatography (19:1 hexane:EtOAc) gave the heterodiyne **23** (51 mg, 0.193 mmol, 87%) as a yellow oil, along with homodimer **24** (2 mg, 0.005 mmol, 3%) as a light yellow solid.

<sup>1</sup>H NMR (400 MHz, CDCl<sub>3</sub>): δ = 4.41 (1 H, t, *J* = 6.5 Hz), 2.38 (1 H, br s), 2.26 (1 H, br s), 1.67-1.74 (2 H, m), 1.53 (6 H, s), 1.42-1.45 (2 H, m), 1.26-1.28 (12 H, m), 0.87 (3 H, t, *J* = 6.7 Hz).

<sup>13</sup>C NMR (100 MHz, CDCl<sub>3</sub>): δ = 83.8, 80.9, 68.9, 66.5, 65.6, 62.9, 37.6, 32.0, 31.1, 29.63, 29.61, 29.4, 29.3, 25.1, 22.7 and 14.2.

IR (neat): 3398, 3054, 2983, 2927, 2856, 1723, 1622, 1462, 1375, 1331, 1264, 1153, 1044, 955, 896, 741, 705, 633, 559, 510, 458, 441 and 421 cm<sup>-1</sup>.

HR ESI-MS: [C<sub>17</sub>H<sub>28</sub>O<sub>2</sub>K]<sup>+</sup> = [M+K]<sup>+</sup> requires 303.1726; found 303.1701

TLC: R<sub>f</sub> = 0.5 (4:1, Hex/EtOAc).

**Scope study for various alkynes in 1,2 DCE****1-(Phenylbuta-1,3-diyne-1-yl)cyclohexan-1-ol (2)**

1,2 DCE gave the coupled alcohol **2** (37 mg, 0.16 mmol, 82%).

**1-(5-Hydroxy-5-phenylhexa-1,3-diyne-1-yl)cyclohexan-1-ol (4)**

1,2 DCE gave coupled alcohol **4** (36 mg, 0.134 mmol, 67 %), along with isolated homo diol **3** (5 mg, 0.02 mmol, 10 %).

**1-(5-Hydroxy-5-methylhexa-1,3-diyne-1-yl)cyclohexan-1-ol (5)**

1,2 DCE gave coupled alcohol **5** (25 mg, 0.012 mmol, 62%), along with isolated homo diol **3** (3 mg, 0.012 mmol, 5 %)

***N*-[5-(1-Hydroxycyclohexyl)penta-2,4-diyne-1-yl]-4-methylbenzenesulfonamide (6)**

1,2 DCE gave coupled alcohol **6** (46 mg, 0.139 mmol, 71 %), along with isolated homo diol **3** (6 mg, 0.024 mmol, 13 %).

**1-(5-Hydroxy-7-phenylhepta-1,3-diyn-1-yl)cyclohexan-1-ol (7)**

1,2 DCE gave coupled alcohol **7** (42 mg, 0.15 mmol, 76%), along with isolated homo diol **3** (3 mg, 0.008 mmol, 5%).

**1-[5-(Benzyloxy)penta-1,3-diyn-1-yl]cyclohexan-1-ol (8)**

1,2 DCE gave coupled alcohol **8** (47 mg, 0.175 mmol, 89%), along with isolated homo diol **3** (3 mg, 0.008 mmol, 5%).

**1-(6-Hydroxyhexa-1,3-diyn-1-yl)cyclohexan-1-ol (9)**

1,2 DCE gave coupled alcohol **9** (24 mg, 0.13 mmol, 66%), along with isolated homo diol **3** (5.5 mg, 0.022 mmol, 12 %).

**6-(1-Hydroxycyclohexyl)hexa-3,5-diyn-1-yl 4-methylbenzenesulfonate (10)**

1,2 DCE gave coupled alcohol **10** (48 mg, 0.138 mmol, 70 %), along with isolated homo diol **3** (6 mg, 0.024 mmol, 12%).

**1-{6-[(*tert*-Butyldimethylsilyl)oxy]hexa-1,3-diyn-1-yl}cyclohexan-1-ol (12)**

1,2 DCE gave coupled alcohol **12** (55 mg, 0.179 mmol, 91%), along with isolated homo diol **3** (2 mg, 0.008 mmol, 3 %).

**1-(Octa-1,3-diyn-1-yl)cyclohexan-1-ol (13)**

1,2 DCE gave coupled alcohol **13** (28 mg, 0.137 mmol, 69%), along with isolated homo diol **3** (7 mg, 0.028 mmol, 14%).

**1-[(Trimethylsilyl)buta-1,3-diyn-1-yl]cyclohexan-1-ol (16)**

Followed method-A. 1-(bromoethynyl)cyclohexan-1-ol (40 mg, 0.20 mmol), TMS-acetylene (21 mg, 0.22 mmol), freshly degassed piperidine (0.1 mL) and 1,2 DCE (4 mL), CuCl (2 mg, 0.02 mmol) stirred for 30 min at 0 °C. Purification by flash column chromatography (9:1 hexane: EtOAc) gave the heterodiyne **16** (36 mg, 0.163 mmol, 83%) as a white solid, along with isolated homo diol (3 mg, 0.012 mmol, 5%).

<sup>1</sup>H NMR (400 MHz, CDCl<sub>3</sub>): δ = 1.94 (1 H, br, s), 1.69-1.73 (2 H, m), 1.47-1.51 (2 H, m), 1.32-1.42 (5 H, m), 1.02-1.08 (1 H, m), -0.0002 (9 H, s).

<sup>13</sup>C NMR (100 MHz, CDCl<sub>3</sub>): δ = 87.5, 87.4, 81.4, 69.2, 69.0, 39.7, 25.1, 23.2 and -0.31.

IR (neat): 3427, 3054, 2983, 2939, 2860, 1731, 1601, 1447, 1423, 1265, 1121, 1048, 901, 849, 742, 705, 657, 542, 479 and 407  $\text{cm}^{-1}$ .

TLC:  $R_f = 0.5$  (4:1, Hex/EtOAc).

M.P.: 102-105 °C

**1-Phenyltetradeca-1,3-diyn-5-ol (18)**

Followed method-B. Propargyl alcohol (40 mg, 0.20 mmol), (iodoethynyl)benzene<sup>14</sup> (50 mg, 0.22 mmol), freshly degassed piperidene (0.1 mL) and tap water (4 mL), CuCl (2 mg, 0.02 mmol) stirred for 30 min at 0 °C. Purification by flash column chromatography (9:1 hexane:EtOAc) gave the heterodiyne **18** (36 mg, 0.13 mmol, 65%) as a yellow oil. along with isolated homo diol **24** (5 mg, 0.014 mmol, 8%).

**1-(Furan-2-yl)-5-phenylpenta-2,4-diyn-1-ol (25)**

Followed method-B. Propargyl alcohol<sup>11</sup> (40 mg, 0.33 mmol), (iodoethynyl)benzene<sup>14</sup> (82 mg, 0.36 mmol), freshly degassed piperidene (0.17 mL) and tap water (7 mL), CuCl (3.2 mg, 0.033 mmol) stirred for 30 min at 0 °C. Purification by flash column chromatography (9:1 hexane: EtOAc) gave the hetero diyne **25** (46 mg, 0.21 mmol, 62%) as a yellow oil.

<sup>1</sup>HNMR (400 MHz, CDCl<sub>3</sub>):  $\delta$  = 7.49 (2 H, dd,  $J$  = 1.3 & 8.0 Hz), 7.42 (1 H, dd,  $J$  = 0.8 & 1.8 Hz), 7.29-7.39 (3 H, m), 6.49 (1 H, d,  $J$  = 3.2 Hz), 6.36 (1 H, dd,  $J$  = 1.8 & 3.2 Hz), 5.58 (1 H, d,  $J$  = 4.8 Hz), 2.72 (1 H, d,  $J$  = 5.9 Hz).

<sup>13</sup>C NMR (100 MHz, CDCl<sub>3</sub>):  $\delta$  = 151.9, 143.3, 132.7, 129.6, 128.6, 128.5, 121.2, 110.6, 108.3, 79.5, 79.1, 73.1, 70.6 and 58.7.

IR (neat): 3439, 3022, 2932, 2861, 1628, 1471, 1399, 1324, 1227, 1183, 1145, 1103, 1071, 1043, 1009, 940, 886, 846, 754, 575, 525, 488, 449 and 431 cm<sup>-1</sup>.

TLC:  $R_f$  = 0.5 (4:1, Hex/EtOAc).

**5-Phenyl-1-(pyridin-3-yl)penta-2,4-diyn-1-ol (26)**

Followed method-B. Propargyl alcohol<sup>11</sup> (40 mg, 0.30 mmol), (iodoethynyl)benzene (75 mg, 0.33 mmol), freshly degassed piperidene (0.15 mL) and tap water (6 mL), CuCl (3 mg, 0.03 mmol) stirred for 30 min at 0 °C. Purification by flash column chromatography (4:1 hexane: EtOAc) gave the heterodiyne **26** (35 mg, 0.206 mmol, 67%) as a brown oil.

<sup>1</sup>HNMR (400 MHz, CDCl<sub>3</sub>):  $\delta$  = 8.68 (1 H, s), 8.51 (1 H, dd,  $J$  = 1.1 & 8.0 Hz), 7.93 (1 H, dt,  $J$  = 1.6 & 7.9 Hz), 7.49 (1 H, d,  $J$  = 7.2 Hz), 7.29-7.37 (5 H, m), 5.66 (1 H, s), 2.42 (1 H, br s).

<sup>13</sup>C NMR (100 MHz, CDCl<sub>3</sub>):  $\delta$  = 149.2, 147.9, 136.3, 135.0, 132.7, 129.6, 128.6, 123.9, 121.2, 81.2, 79.7, 62.7, 71.6 and 76.8.



IR (neat): 3433, 2861, 2951, 2861, 1627, 1548, 1530, 1478, 1404, 1260, 1191, 1121, 1049, 874, 667, 639, 597, 549, 478, 450 and 405  $\text{cm}^{-1}$ ;

TLC:  $R_f = 0.3$  (4:1, Hex/EtOAc).

### 1-(2-Iodophenyl)-5-phenylpenta-2,4-diyne-1-ol (**27**)

Followed method-B. Propargyl alcohol<sup>11</sup> (40 mg, 0.15 mmol), (iodoethynyl)benzene (38 mg, 0.17 mmol), freshly degassed piperidine (0.07 mL) and tap water (3 mL), CuCl (1.5 mg, 0.015 mmol) stirred for 30 min at 0 °C. Purification by flash column chromatography (9:1 hexane: EtOAc) gave the heterodiyne **27** (46 mg, 0.13 mmol, 86%) as a yellow oil.

<sup>1</sup>HNMR (400 MHz,  $\text{CDCl}_3$ ):  $\delta = 7.84$  (1 H, dd,  $J = 1.1$  & 7.9 Hz), 7.74 (1 H, dd,  $J = 1.6$  & 7.8 Hz), 7.48 (2 H, dd,  $J = 1.3$  & 8.0 Hz), 7.41 (1 H, td,  $J = 1.7$  & 7.7 Hz), 5.79 (1 H, s), 2.78 (1 H, br s).

<sup>13</sup>C NMR (100 MHz,  $\text{CDCl}_3$ ):  $\delta = 141.7, 139.8, 132.7, 130.4, 129.5, 128.9, 128.5, 128.3, 121.3, 97.9, 80.8, 79.6, 73.3, 71.6$  and 69.2.

IR (neat): 3435, 3054, 2986, 2926, 1732, 1628, 1594, 1511, 1442, 1422, 1375, 1319, 1265, 1163, 1104, 1046, 986, 895, 780, 739, 705, 531 and 423  $\text{cm}^{-1}$ ;

HR ESI-MS:  $[\text{C}_{17}\text{H}_{12}\text{IO}]^+ = [\text{M}-\text{OH}_2]^+$  requires 340.9827: found; 340.9821

### 1-(2-Fluorophenyl)-5-phenylpenta-2,4-diyne-1-ol (**28**)

Followed method-B. Propargyl alcohol<sup>11</sup> (40 mg, 0.27 mmol), (iodoethynyl)benzene (67 mg, 0.293 mmol), freshly degassed piperidine (0.13 mL) and tap water (5 mL), CuCl (3 mg, 0.03 mmol) stirred for 30 min at 0 °C. Purification by flash column chromatography (9:1 hexane: EtOAc) gave the heterodiyne **28** (58 mg, 0.232 mmol, 87%) as a yellow oil.

<sup>1</sup>HNMR (400 MHz,  $\text{CDCl}_3$ ):  $\delta = 7.64$  (1 H, td,  $J = 1.7$  & 7.6 Hz), 7.47 (2 H, dd,  $J = 1.2$  & 7.9 Hz), 7.28-7.35 (4 H, m), 7.18 (1 H, td,  $J = 1.0$  & 7.6 Hz), 7.06 (1 H, ddd,  $J = 1.0, 7.0$  & 8.2 Hz), 5.84-5.85 (1 H, d,  $J = 2.6$  Hz), 2.80 (1 H, br s).

<sup>13</sup>C NMR (100 MHz,  $\text{CDCl}_3$ ):  $\delta = 161.3, 158.8, 132.7, 130.6, 130.5, 129.5, 128.5, 128.4, 127.1, 126.9, 124.7, 124.6, 121.3, 115.9, 115.7, 80.6, 79.5, 73.2, 71.2, 59.7$  and 59.6.

IR (neat): 3435, 3056, 2983, 2926, 2861, 1706, 1616, 1590, 1487, 1456, 1378, 1330, 1265, 1230, 1175, 1094, 998, 943, 876, 690, 755, 690, 619, 563, 528, 448 and 413  $\text{cm}^{-1}$ .

HR ESI-MS:  $[\text{C}_{17}\text{H}_{12}\text{FO}]^+ = [\text{M}+\text{H}]^+$  requires 251.0872; found; 251.0875

TLC:  $R_f = 0.5$  (4:1, Hex/EtOAc).

### 1-(Naphthalen-1-yl)-5-phenylpenta-2,4-diyne-1-ol (**29**)

Followed method-B. Propargyl alcohol<sup>11</sup> (40 mg, 0.22 mmol), (iodoethynyl)benzene (55 mg, 0.24 mmol), freshly degassed piperidine (0.1 mL) and tap water (4 mL), CuCl (2 mg, 0.02 mmol) stirred for 30 min at 0 °C. Purification by flash column chromatography (9:1 hexane:EtOAc) gave the heterodiyne **29** (45 mg, 0.16 mmol, 73%) as a yellow oil.

<sup>1</sup>H NMR (400 MHz,  $\text{CDCl}_3$ ):  $\delta = 8.27$  (1 H, d,  $J = 8.5$  Hz), 7.82-7.89 (3 H, m), 7.45-7.60 (5 H, m), 7.28-7.35 (3 H, m), 6.23 (1 H, d,  $J = 4.7$  Hz), 2.63 (1 H, d,  $J = 5.2$  Hz).

<sup>13</sup>C NMR (100 MHz,  $\text{CDCl}_3$ ):  $\delta = 134.9, 134.1, 132.7, 130.5, 129.7, 129.5, 128.9, 128.5, 126.7, 126.1, 125.3, 124.9, 123.8, 121.4, 81.5, 77.4, 77.3, 72.0$  and 63.6.

IR (neat): 3435, 3054, 2986, 2926, 1732, 1628, 1594, 1511, 1442, 1422, 1375, 1319, 1265, 1163, 1104, 1046, 986, 895, 780, 739, 705, 531 and 423  $\text{cm}^{-1}$ .

HR ESI-MS:  $[\text{C}_{21}\text{H}_{14}\text{OK}]^+ = [\text{M}+\text{K}]^+$  requires 321.0682; found 321.0670

TLC:  $R_f = 0.5$  (4:1, Hex/EtOAc).

### 1-{7-[(*tert*-Butyldimethylsilyloxy)hepta-1,3,5-triyn-1-yl]}cyclohexan-1-ol (**30**)

Followed method-A. 1-(bromoethynyl)cyclohexan-1-ol (40 mg, 0.20 mmol), *tert*-butyldimethyl (penta-2,4-diyne-1-yloxy)silane<sup>15</sup> **33** (42 mg, 0.22 mmol), freshly degassed piperidine (0.1 mL) and tap water (4 mL), CuCl (2 mg, 0.02 mmol) stirred for 30 min at 0 °C. Purification by flash column chromatography (9:1 hexane:EtOAc) gave the heterodiyne **30** (42 mg, 0.133 mmol, 68%) as a brown oil.

<sup>1</sup>H NMR (400 MHz,  $\text{CDCl}_3$ ):  $\delta = 4.26$  (2 H, s), 2.10 (1 H, br s), 1.77-1.80 (2 H, m), 1.38-1.58 (6 H, m), 1.09-1.14 (2 H, m), 0.78 (9 H, s), -0.0002 (6 H, s).

<sup>13</sup>C NMR (100 MHz,  $\text{CDCl}_3$ ):  $\delta = 83.8, 82.0, 69.9, 69.8, 69.3, 69.2, 63.2, 52.2, 39.8, 25.8, 25.1, 23.2, 18.3$  and -5.1.

IR (neat): 3406, 2935, 2855, 1712, 1635, 1454, 1400, 1374, 1336, 1255, 1159, 1068, 967, 833, 774, 662, 544, 507, 434 and 409  $\text{cm}^{-1}$ .

HR ESI-MS:  $[\text{C}_{19}\text{H}_{29}\text{O}_2\text{Si}]^+ = [\text{M}+\text{H}]^+$  requires 318.1970; found 318.1970.

TLC:  $R_f = 0.5$  (4:1, Hex/EtOAc).

### 10-[(*tert*-Butyldimethylsilyloxy)-1-phenyldeca-4,6,8-triyn-3-ol] (31)

Followed method-A. 1-bromo-5-phenylpent-1-yn-3-ol<sup>16</sup> **32** (40 mg, 0.14 mmol), *tert*-butyldimethyl(penta-2,4-diyn-1-yloxy)silane<sup>15</sup> **33** (30 mg, 0.153 mmol), freshly degassed piperidene (0.07 mL) and tap water (3 mL), CuCl (1.4 mg, 0.014 mmol) stirred for 30 min at 0°C. Purification by flash column chromatography (9:1 hexane:EtOAc) gave the heterodiyne **31** (42 mg, 0.12 mmol, 85%) as a brown oil.

<sup>1</sup>HNMR (400 MHz,  $\text{CDCl}_3$ ):  $\delta = 7.16$  (2 H, t,  $J = 7.7$  Hz), 7.06-7.10 (3 H, m), 4.26 (1 H, t,  $J = 6.5$  Hz), 4.22 (2 H, d,  $J = 1.00$  Hz), 2.65 (2 H, t,  $J = 7.8$  Hz), 2.12 (1 H, br s), 1.88-1.90 (2 H, m), 0.78 (9 H, s), -0.0002 (6H, s).

<sup>13</sup>C NMR (100 MHz,  $\text{CDCl}_3$ ):  $\delta = 140.8, 128.7, 128.60, 126.2, 80.9, 79.0, 77.6, 75.1, 70.2, 69.8, 67.9, 62.7, 52.0, 38.8, 25.8, 18.3$  and -5.1.

IR (neat): 3427, 3304, 3064, 3026, 2957, 2930, 2903, 2855, 1716, 1598, 1464, 1368, 1255, 1143, 1089, 838, 780, 731, 700, 667, 624, 539 and 485  $\text{cm}^{-1}$ .

HR ESI-MS:  $[\text{C}_{22}\text{H}_{29}\text{O}_2\text{Si}]^+ = [\text{M}+\text{H}]^+$  requires 354.1970; found 354.1965.

TLC:  $R_f = 0.5$  (4:1, Hex/EtOAc).

### 1-[9-(*tert*-Butyldimethylsilyloxy)nona-1,3,5,7-tetraynyl]cyclohexanol (34)

Followed method-A. 1-(bromobuta-1,3-diynyl)cyclohexanol **35** (40 mg, 0.18 mmol), *tert*-butyldimethyl(penta-2,4-diyn-1-yloxy)silane<sup>15</sup> **33** (38 mg, 0.194 mmol), freshly degassed piperidene (0.09 mL) and tap water (3 mL), CuCl (1.8 mg, 0.02 mmol) stirred for 30 min at 0°C. Purification by flash column chromatography (9:1 hexane:EtOAc) gave the heterodiyne **34** (37 mg, 0.11 mmol, 61%) as a brown oil.

<sup>1</sup>HNMR (400 MHz,  $\text{CDCl}_3$ ):  $\delta = 4.27$  (2 H, s), 1.79-1.82 (2 H, s), 1.38-1.60 (7 H, m), 1.13-1.16 (1 H, m), 0.78 (9 H, s), -0.0002 (6 H, s).

$^{13}\text{C}$  NMR (100 MHz,  $\text{CDCl}_3$ ):  $\delta = 82.0, 69.8, 69.3, 69.1, 63.9, 63.3, 61.9, 61.6, 52.1, 39.5, 25.7, 24.9, 23.0, 18.2, 0.01, -5.19$ .

IR (neat): 3422, 3303, 3053, 2933, 2894, 2857, 1731, 1616, 1590, 1490, 1466, 1367, 1260, 1138, 1084, 1006, 966, 939, 896, 837, 781, 741, 708, 665, 628, 455 and  $425\text{ cm}^{-1}$ .

HR ESI-MS:  $[\text{C}_{21}\text{H}_{29}\text{O}_2\text{Si}]^+ = [\text{M}+\text{H}]^+$  requires 341.1937 ; found 341.1930.

TLC:  $R_f = 0.5$  (4:1, Hex/EtOAc).

### **1-(Bromobuta-1,3-diynyl)cyclohexanol (35)**

Alkyne<sup>15</sup> (100 mg, 0.68 mmol), *N*-bromosuccinimide (131 mg, 0.743 mmol),  $\text{AgNO}_3$  (11 mg, 0.08 mmol) and acetone (5 mL) were stirred 2 h at  $0\text{ }^\circ\text{C}$ . Purification by flash chromatography (9:1; hexane:EtOAc) gave bromide **35** (120 mg, 0.53 mmol, 78 %)

$^1\text{H}$ NMR (400 MHz,  $\text{CDCl}_3$ ):  $\delta = 3.09$  (1 H, br s), 1.92-2.10 (2 H, m), 1.47-1.71 (7 H, m), 1.22-1.28 (1 H, m).

$^{13}\text{C}$  NMR (100 MHz,  $\text{CDCl}_3$ ):  $\delta = 78.3, 69.2, 69.1, 64.9, 41.4, 39.6, 25.0$  and  $23.1$ .

IR (neat): 3419, 3157, 2938, 2859, 1784, 1726, 1603, 1448, 1373, 1339, 1284, 1260, 1185, 1056, 1030, 962, 912, 851, 743, 727, 650, 549, 524, 482 and  $405\text{ cm}^{-1}$ .

TLC:  $R_f = 0.5$  (4:1, Hex/EtOAc).

### ***N*-(3-Bromoprop-2-yn-1-yl)-4-methylbenzenesulfonamide (36)**

Alkyne<sup>2</sup> (100 mg, 0.48 mmol), *N*-bromosuccinamide (93 mg, 0.53 mmol),  $\text{AgNO}_3$  (9 mg, 0.05 mmol) and acetone (5 mL) were stirred 2 h at  $0\text{ }^\circ\text{C}$ . Purification by flash chromatography (9:1; hexane:EtOAc) gave bromide **36** (120 mg, 0.42 mmol, 79 %).

$^1\text{H}$ NMR (400 MHz,  $\text{CDCl}_3$ ):  $\delta = 7.76$  (2 H, d,  $J = 8.3\text{ Hz}$ ), 7.33 (2 H, d,  $J = 8.0\text{ Hz}$ ), 4.59 (1 H, br s), 3.86 (1 H, d,  $J = 6.2\text{ Hz}$ ), 2.43 (3 H, s).

$^{13}\text{C}$  NMR (100 MHz,  $\text{CDCl}_3$ ):  $\delta = 144.0, 136.7, 129.8, 127.5, 74.3, 45.0, 34.0$  and  $21.7$ .

IR (neat): 3247, 3057, 3154, 2985, 2928, 2859, 1730, 1645, 1600, 1416, 1333, 1265, 1160, 1085, 1046, 898, 673, 598, 547 and  $435\text{ cm}^{-1}$ .

TLC:  $R_f = 0.5$  (4:1, Hex/EtOAc)

***N*-(3-Iodoprop-2-yn-1-yl)-4-methylbenzenesulfonamide (xx)**

Alkyne<sup>10</sup> (300 mg, 1.43 mmol), *N*-iodosuccinimide (385 mg, 1.72 mmol), AgNO<sub>3</sub> (121 mg, 0.71 mmol), and acetone (10 mL) were stirred for 2 h at 0 °C. Purification by flash column chromatography (9:1; hexane:EtOAc) gave the iodide **xx** as a yellow oil (450 mg, 1.34 mmol, 94%).

<sup>1</sup>H NMR (400 MHz, CDCl<sub>3</sub>): δ = 7.76 (2 H, d, *J* = 8.3 Hz), 7.33 (2 H, d, *J* = 8.0 Hz), 4.73 (1 H, t, *J* = 6.0 Hz), 3.98 (2 H, d, *J* = 6.2 Hz), and 2.44 (3 H, s).

<sup>13</sup>C NMR (100 MHz, CDCl<sub>3</sub>): δ = 144.0, 136.6, 129.9, 127.6, 88.1, 45.0, 34.8 and 21.7

IR (neat): 3430, 3279, 2922, 2853, 1653, 1426, 1316, 1152, 1074, 983, 855, 810, 753, 677, 535 and 473 cm<sup>-1</sup>

TLC: R<sub>f</sub> = 0.5 (4:1, Hex/EtOAc)

**4-Iodo-2-methylbut-3-yn-2-ol (xx)**

2-methylbut-3-yn-2-ol (300 mg, 3.6 mmol), *N*-iodosuccinimide (959 mg, 4.3 mmol), AgNO<sub>3</sub> (301 mg, 1.9 mmol), and acetone (23 mL) were stirred for 2 h at 0 °C. Purification by flash column chromatography (9:1; hexane:EtOAc) gave the iodide **xx** (420 mg, 2.0 mmol, 56%) as a yellow oil.

<sup>1</sup>H NMR (400 MHz, CDCl<sub>3</sub>): δ = 1.52 (6 H, d, *J* = 3.3 Hz), 2.37 (1 H, br s)

<sup>13</sup>C NMR (100 MHz, CDCl<sub>3</sub>): δ = 99.2, 66.9 and 31.4

IR (neat): 3428, 3053, 2985, 2934, 1453, 1424, 1368, 1330, 1266, 1219, 1164, 965, 903, 742, 706 and 561 cm<sup>-1</sup>

TLC: R<sub>f</sub> = 0.5 (4:1, Hex/EtOAc)

**4-Iodo-2-phenylbut-3-yn-2-ol (xx)**

2-Phenylbut-3-yn-2-ol (200 mg, 1.37 mmol), *N*-iodosuccinimide (370 mg, 1.65 mmol), AgNO<sub>3</sub> (110 mg, 0.68 mmol), and acetone (10 mL) were stirred for 2 h at 0 °C. Purification by flash chromatography (9:1; hexane:EtOAc) gave the iodide **xx** (300 mg, 1.10 mmol, 80%) as a yellow oil.

**<sup>1</sup>H NMR** (400 MHz, CDCl<sub>3</sub>): δ = 7.61 (2 H, d, *J* = 7.3 Hz), 7.24-7.37 (3 H, m), 2.58 (1 H, br s), 1.77 (3 H, s)

**<sup>13</sup>C NMR** (100 MHz, CDCl<sub>3</sub>): δ = 145.1, 128.4, 128.0, 124.9, 97.9, 71.6, 60.5 and 33.2

**IR (neat)**: 3399, 3059, 3030, 2984, 2928, 1666, 1599, 1494, 1446, 1368, 1328, 1267, 1224, 1153, 1090, 1050, 940, 893, 766, 616, 585 and 432 cm<sup>-1</sup>

**TLC**: R<sub>f</sub> = 0.5 (4:1, Hex/EtOAc)

**(3-Iodoprop-2-yn-1-yl)oxy)methyl)benzene (xx)**

((prop-2-yn-1-yloxy)methyl)benzene (200 mg, 1.37 mmol), N-iodosuccinamide (370 mg, 1.65 mmol), AgNO<sub>3</sub> (110 mg, 0.68 mmol), and acetone (10 mL) were stirred for 2 h at 0 °C.

Purification by flash column chromatography (9:1; hexane:EtOAc) gave the iodide **xx** (300 mg, 1.10 mmol, 80 %) as yellow oil.

**<sup>1</sup>H NMR** (400 MHz, CDCl<sub>3</sub>): δ = 7.34-7.39 (5 H, m), 4.58 (2 H, s), 4.31 (2 H, s)

**<sup>13</sup>C NMR** (100 MHz, CDCl<sub>3</sub>): δ = 137.2, 128.5, 128.2, 128.0, 90.6, 71.8, 65.8 and 58.8

**IR (neat)**: 3056, 2984, 2931, 2897, 1724, 1634, 1496, 1455, 1355, 1276, 1208, 1164, 1078, 1026, 984, 936, 906, 860, 702 and 596 cm<sup>-1</sup>

**TLC**: R<sub>f</sub> = 0.5 (4:1, Hex/EtOAc)

**References:**

- 1) E. D. Juardi, P. B. Sambat and E. Mc. Nelis, *Tetrahedron Lett.* **1994**, *50*, 11793.
- 2) L. S. Kocsis, E. Beredetti and K. M. Brummond, *Org. Lett.*, **2012**, *14*, 4430.
- 3) P. A. Allegretti and E. M. Ferreira, *Org. Lett.*, **2011**, *13*, 5924.
- 4) D. Farran, A. M. Z. Slawin, P. Kirsch, D. O' Hagan, *J. Org. Chem.*, **2009**, *74*, 7168.
- 5) G. Belangar, M. Dupuis and R. Larouche-Gauthier, *J. Org. Chem.*, **2012**, *77*, 3215.
- 6) M. Li, Y. J. Li, B. Zhao, F. Liang and L.-Y. Jin, *RSC Advances*, **2014**, *4*, 30046.
- 7) J. Zheng, H. Cheng, F. Wang and L. Liu, *J. Am. Chem. Soc.*, **2011**, *133*, 11080.
- 8) L. Li, J. X. Wang, G. Zhang and Q. F. Liu, *Tetrahedron Lett.*, **2009**, *50*, 4033.
- 9) S. A. Fleming, R. Liu, J. T. Reddy, *Tetrahedron Lett.*, **2005**, *46*, 8095.
- 10) O. V. Zatolochnaya, V. Geavorgyan, *Org. Lett.*, **2013**, *15*, 2562.
- 11) B. S. Chinta, B. Baire, *J. Org. Chem.*, **2015**, *80*, 10208.
- 12) *Zhurnal Obshchei Khimii*, **1959**, *29*, 457.
- 13) Y. Xing, B. Cheng, J. Wang, P. Lu, Y. Wang., *Org. Lett.*, **2014**, *16*, 4814.
- 14) W. Cheen, J. Zhang, B. Wang, Z. Xing, Z. X. Wang, Y. Hu, *J. Org. Chem.*, **2015**, *80*, 2413.
- 15) K. Wang, E. J. Cho, S. Y. Yun, J. Y. Rhee, D. Lee, *Tetrahedron Lett.*, **2013**, *69*, 9105.
- 16) R. Karmakar, S. Y. Yun, J. Chen, Y. Z. Xia, D. Lee, *Angew. Chem., Int. Ed*, **2015**, *54*, 6582.

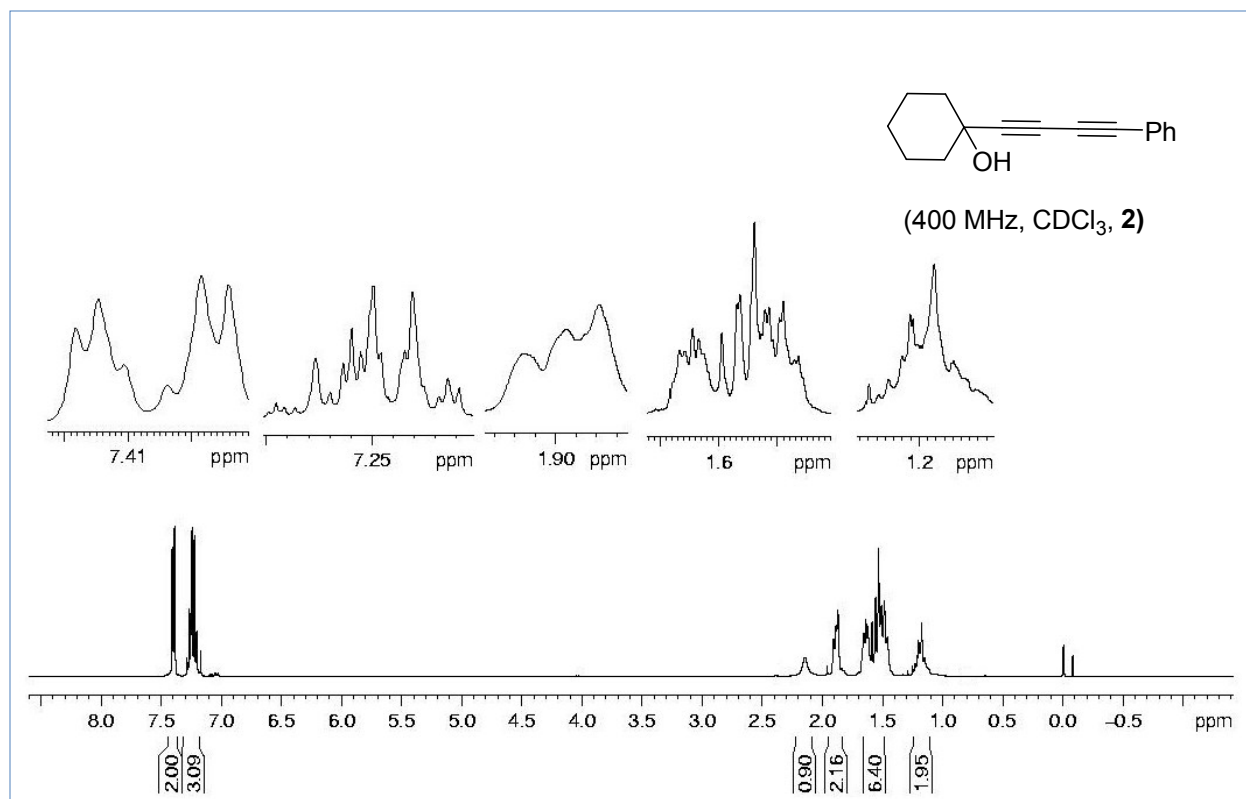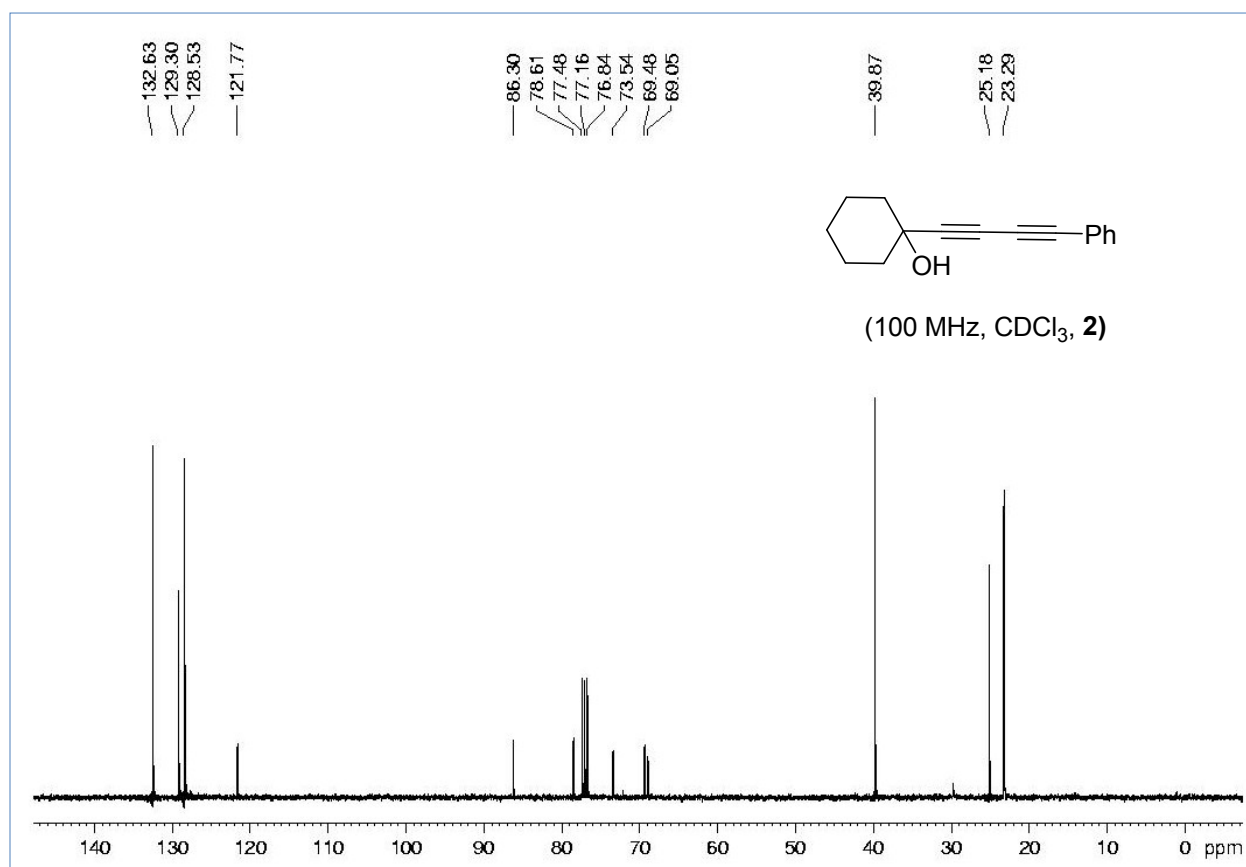



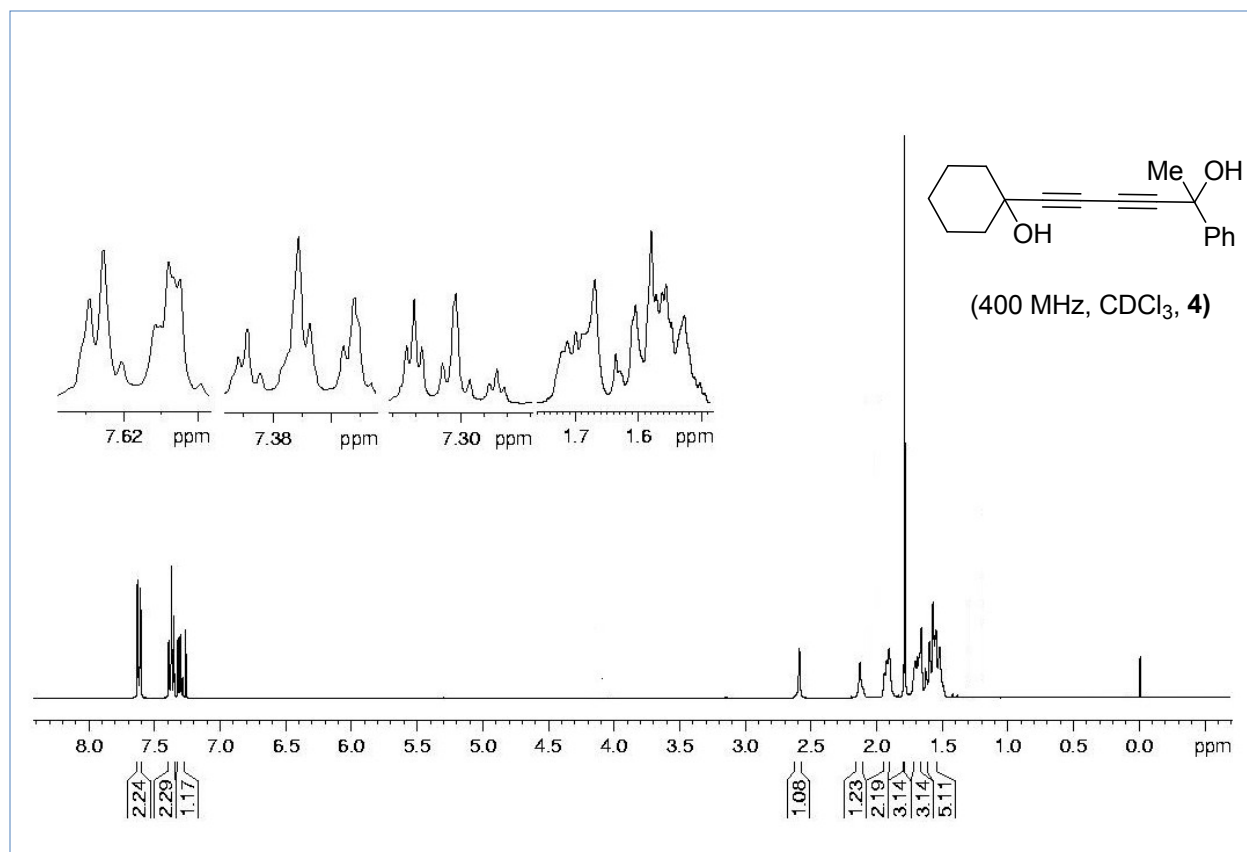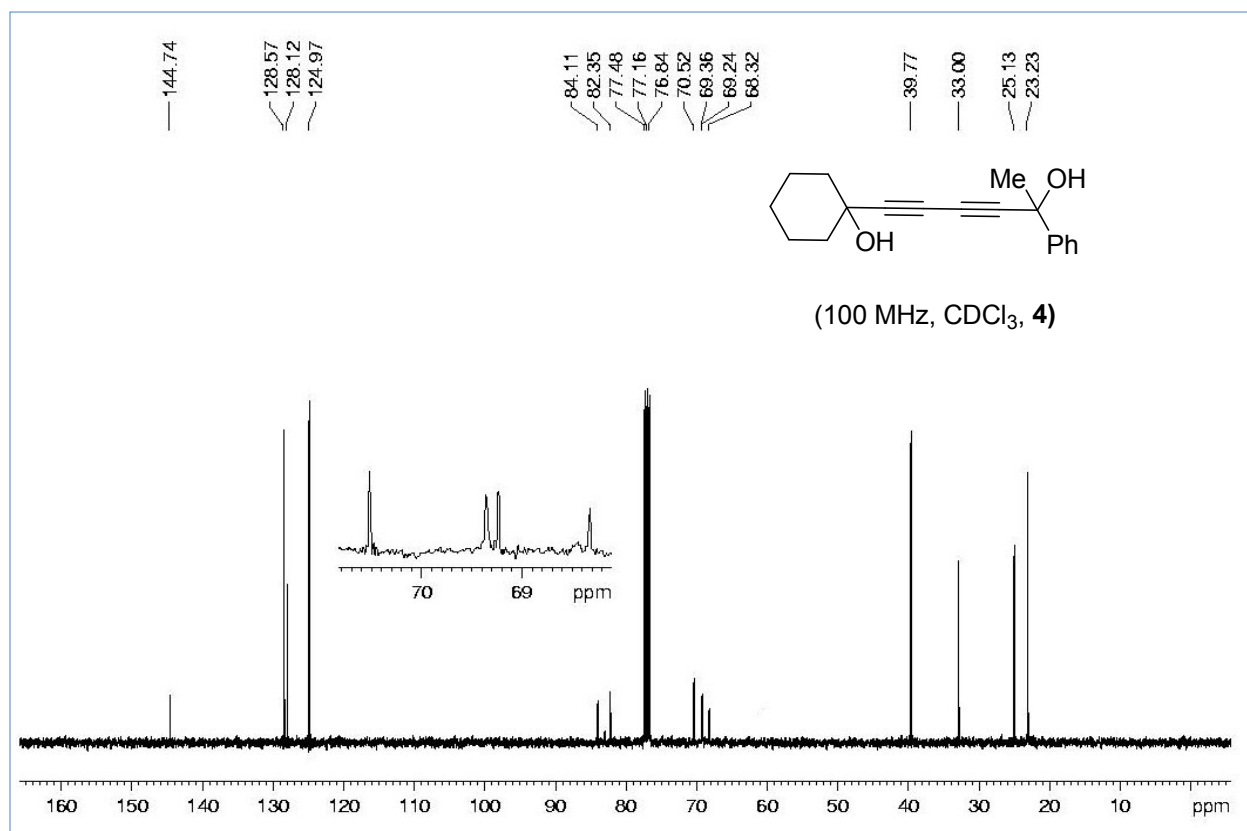

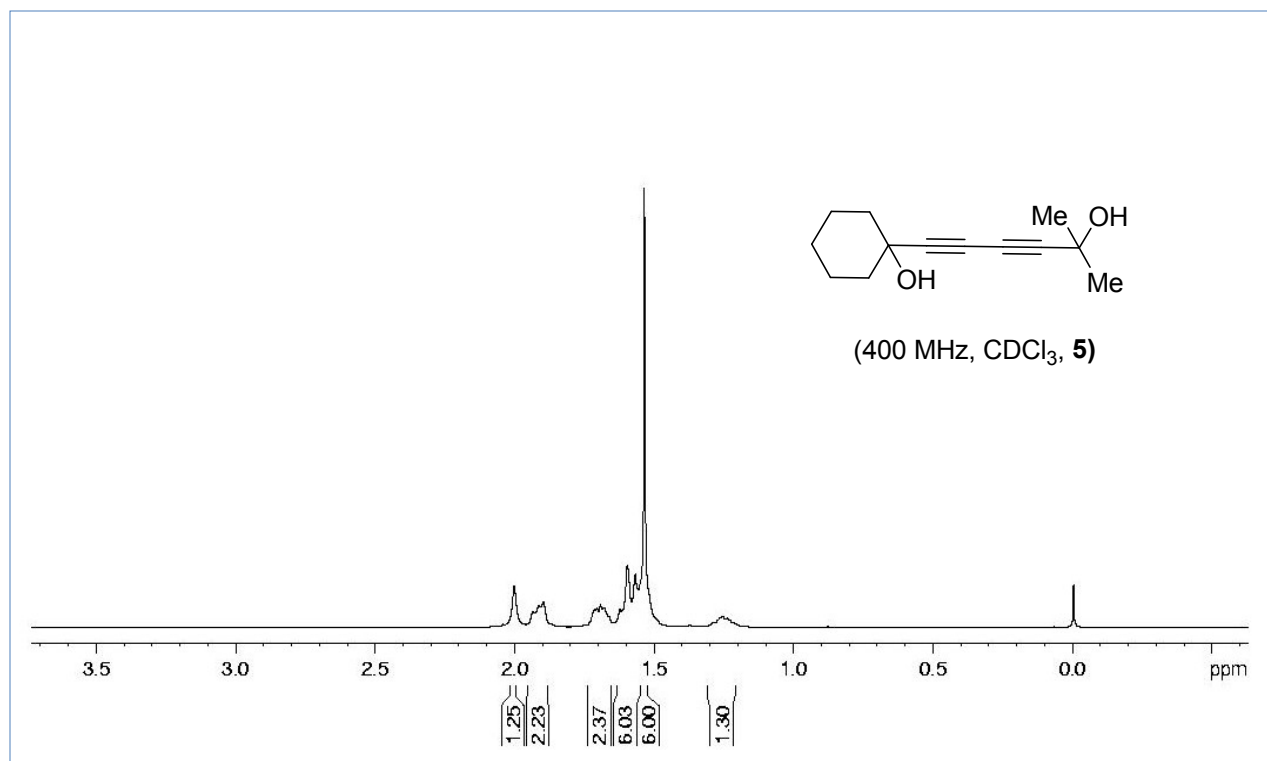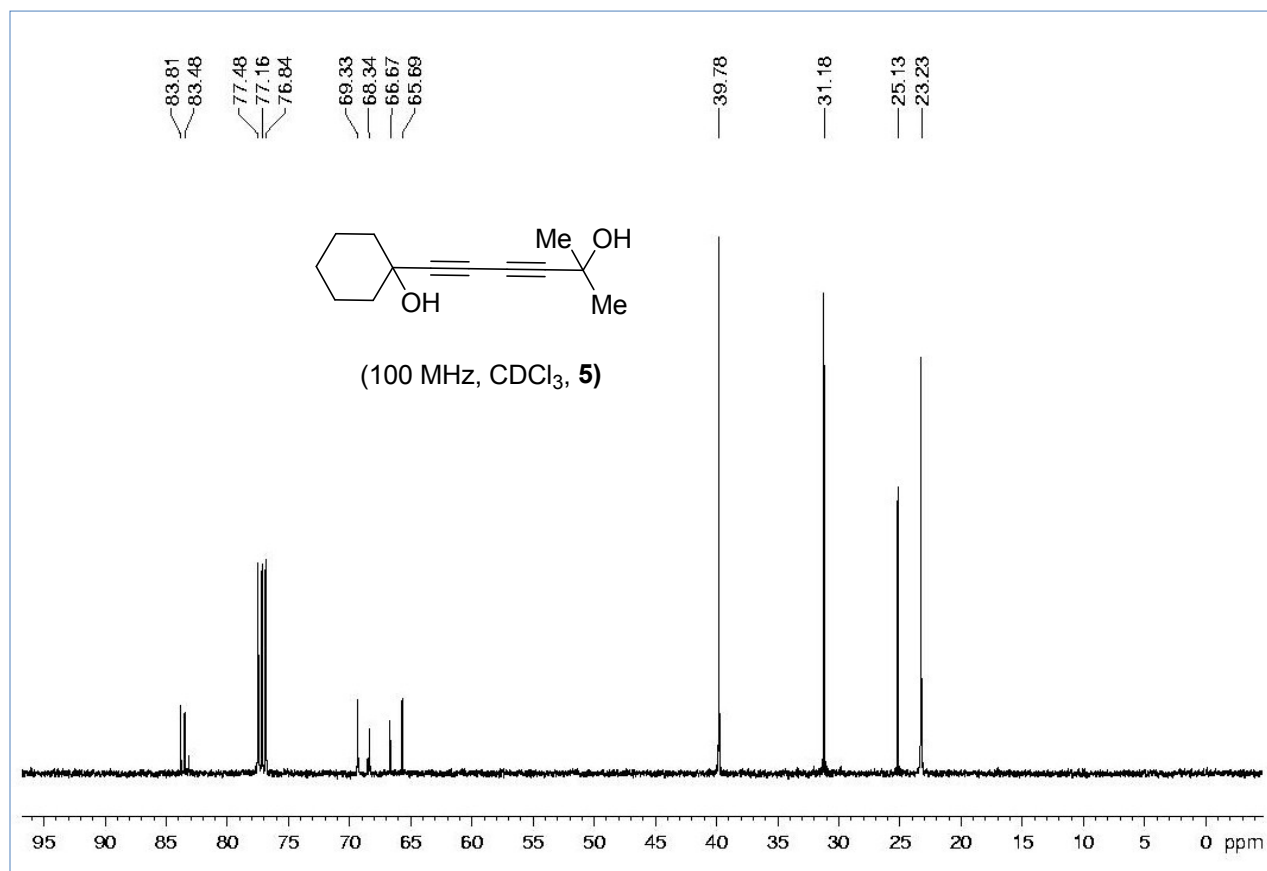

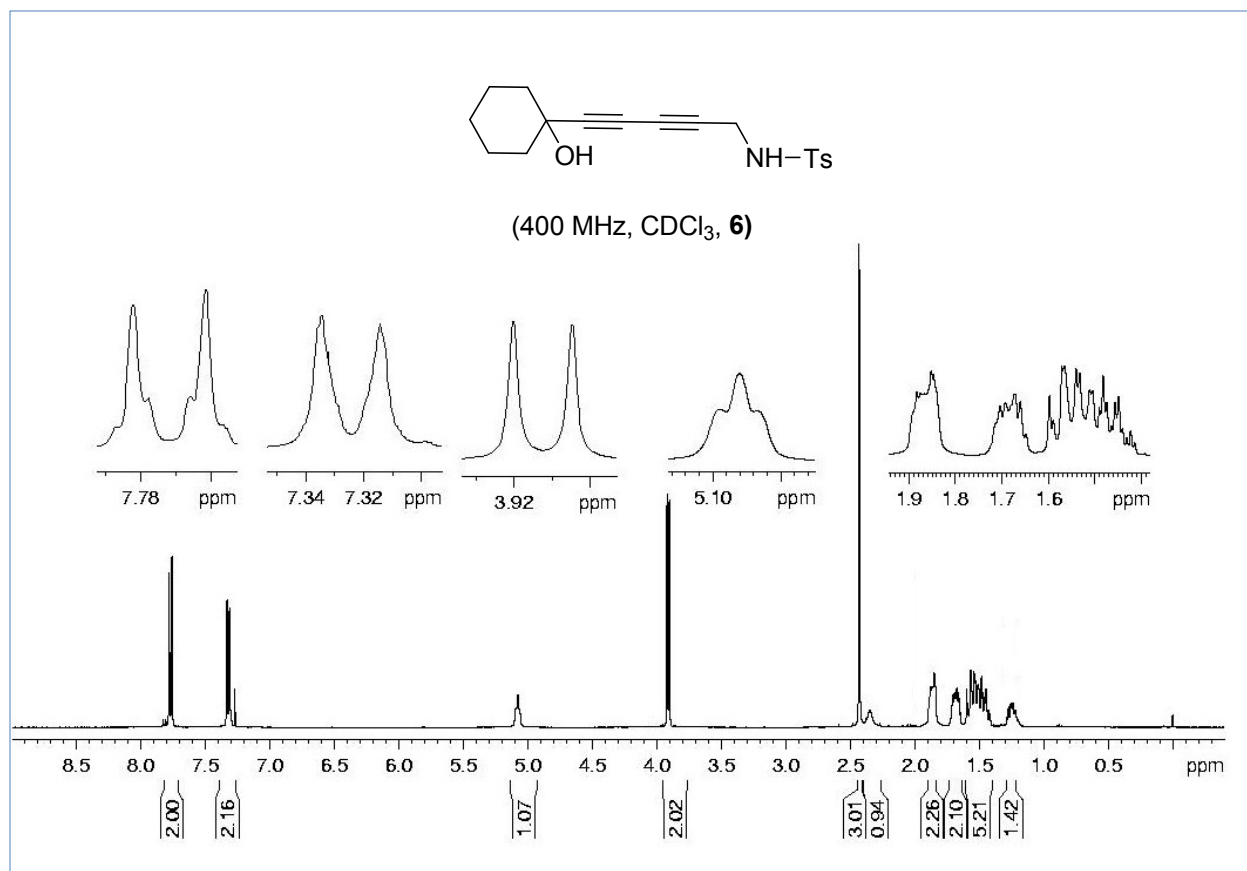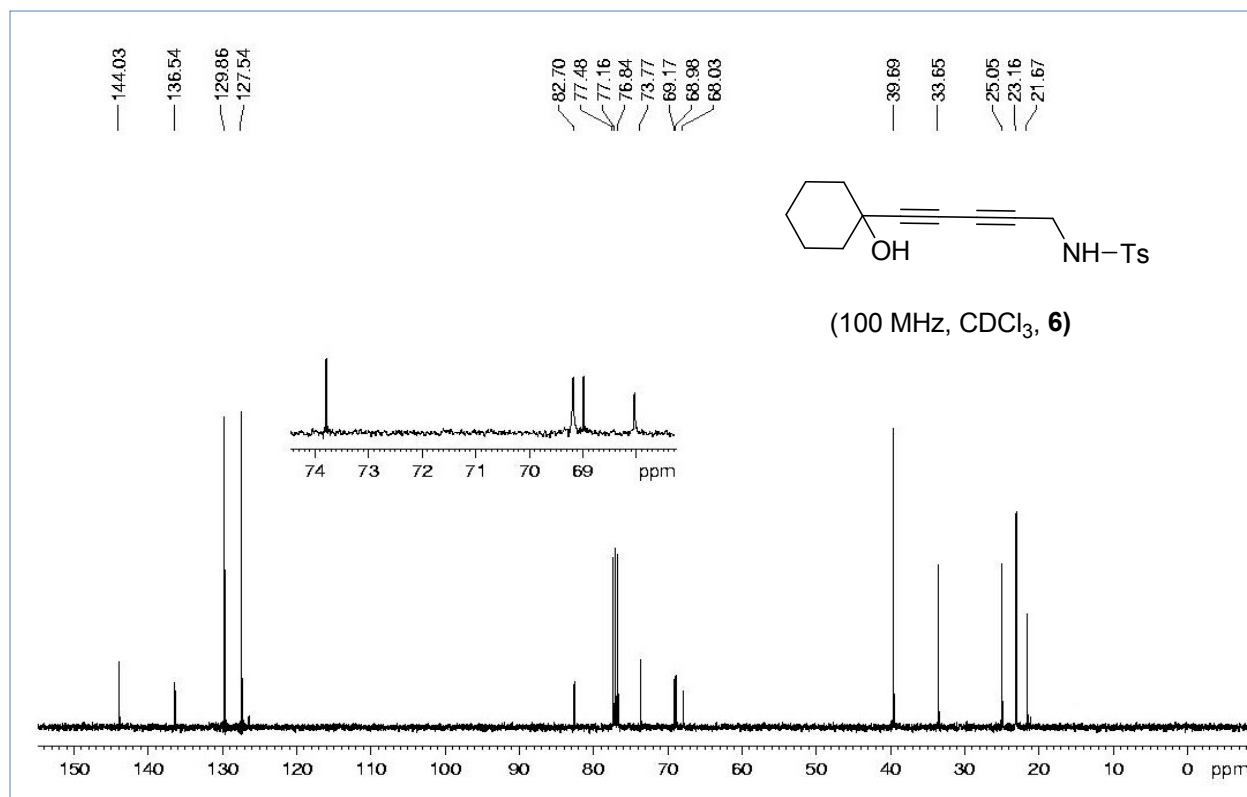

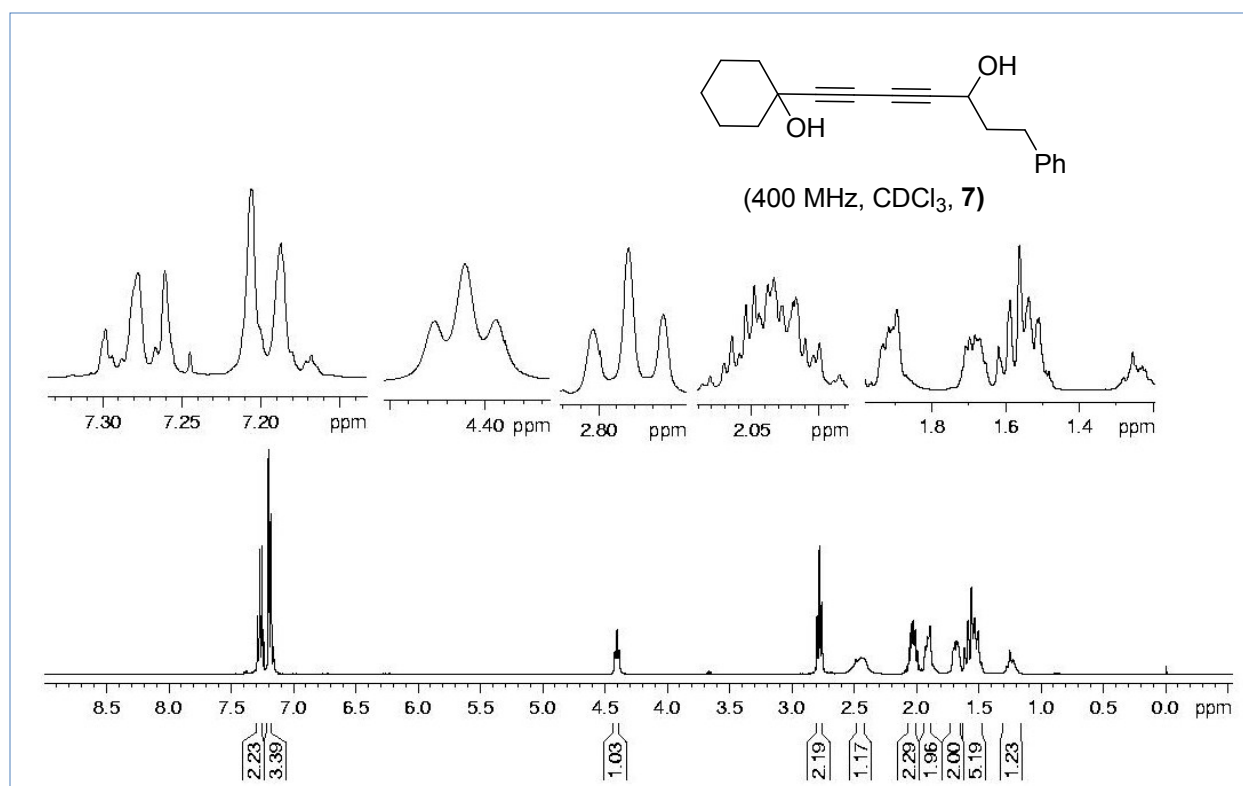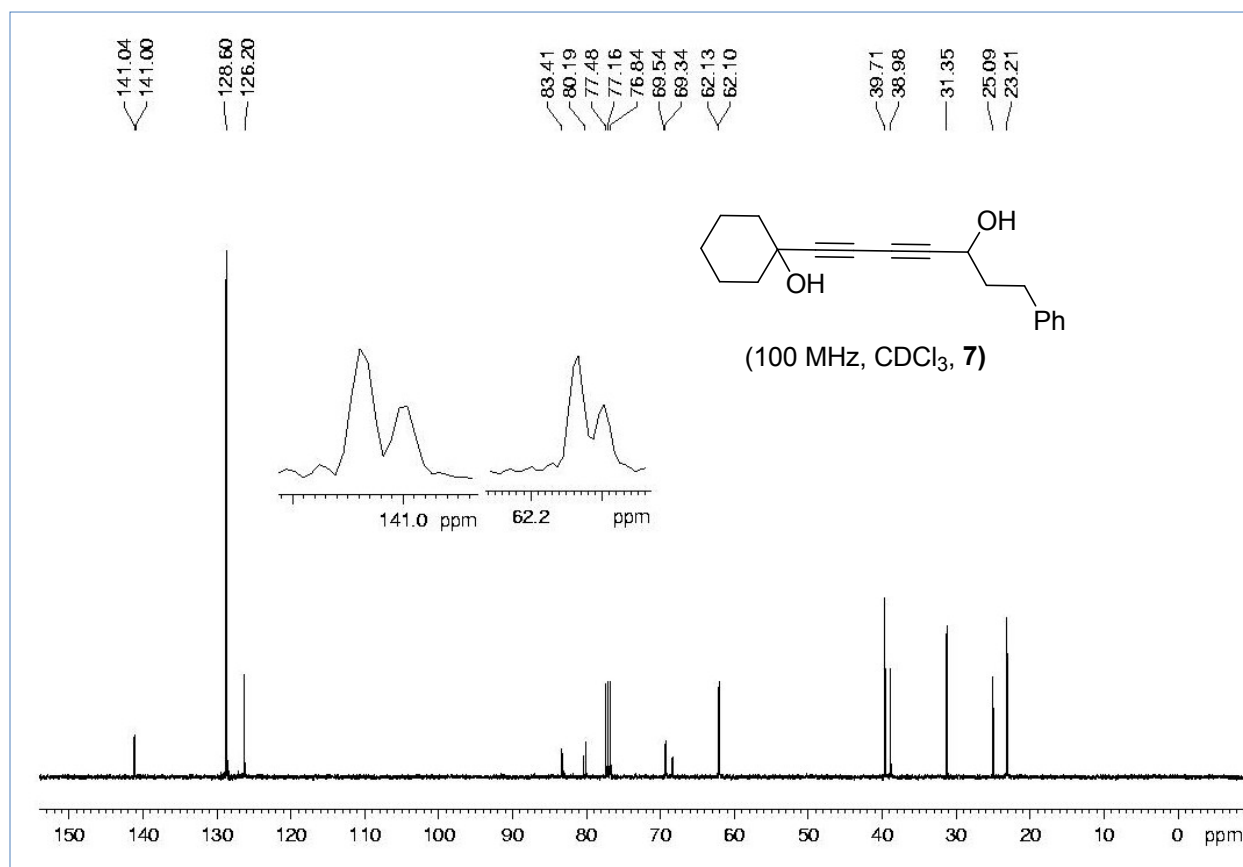

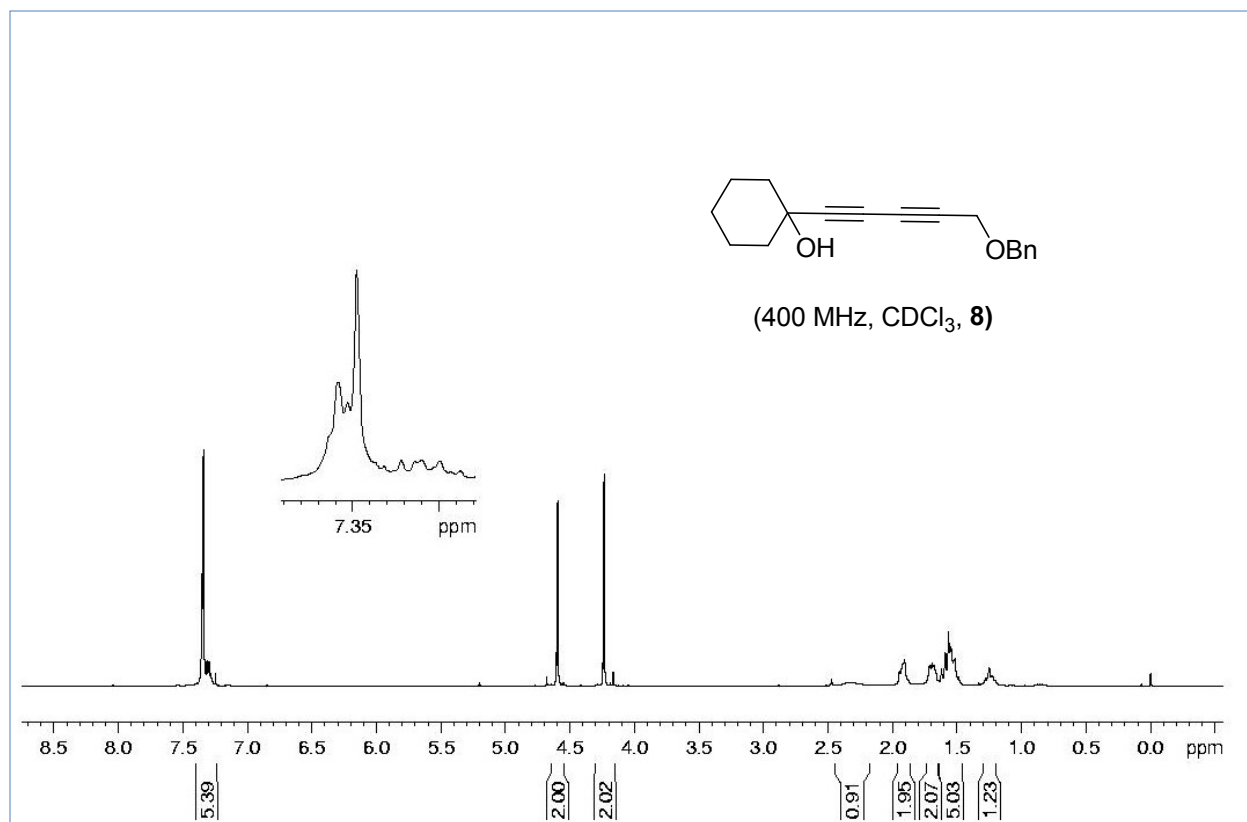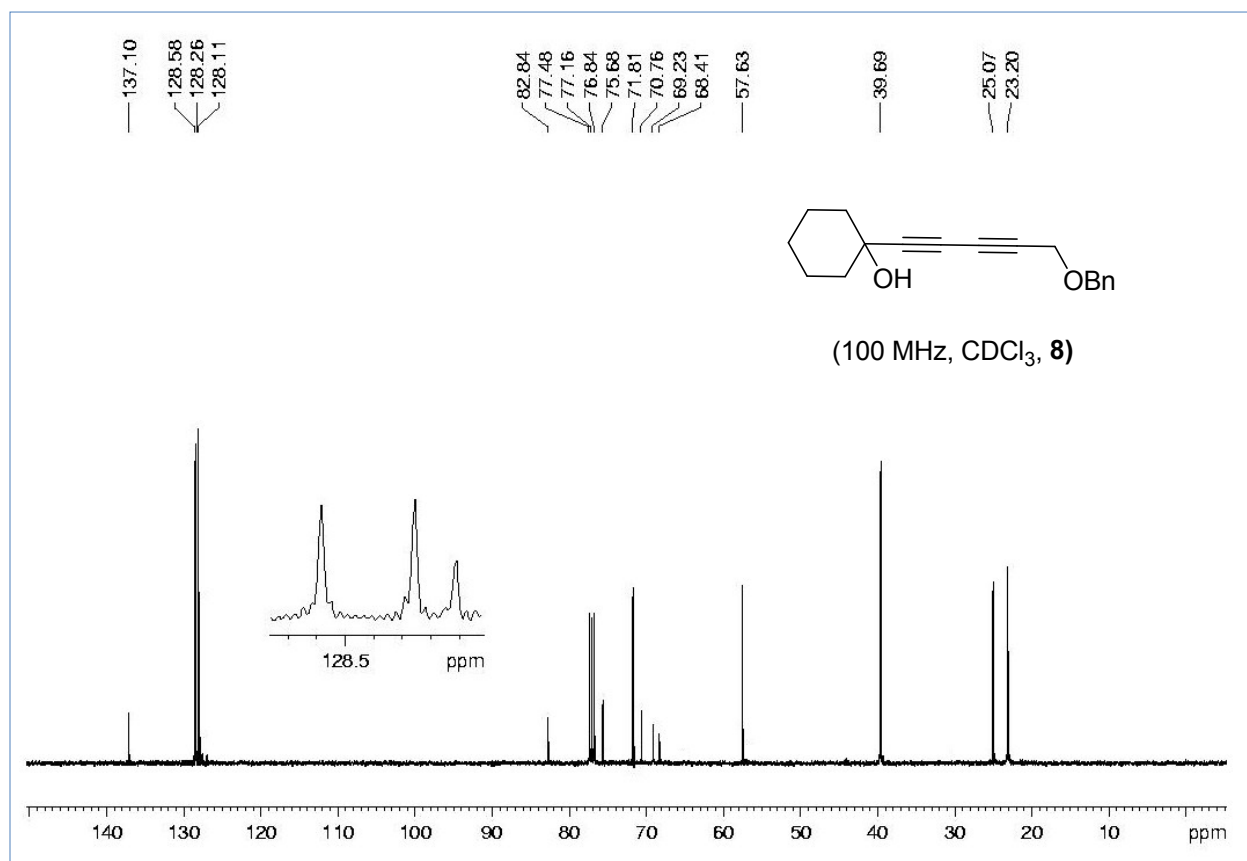

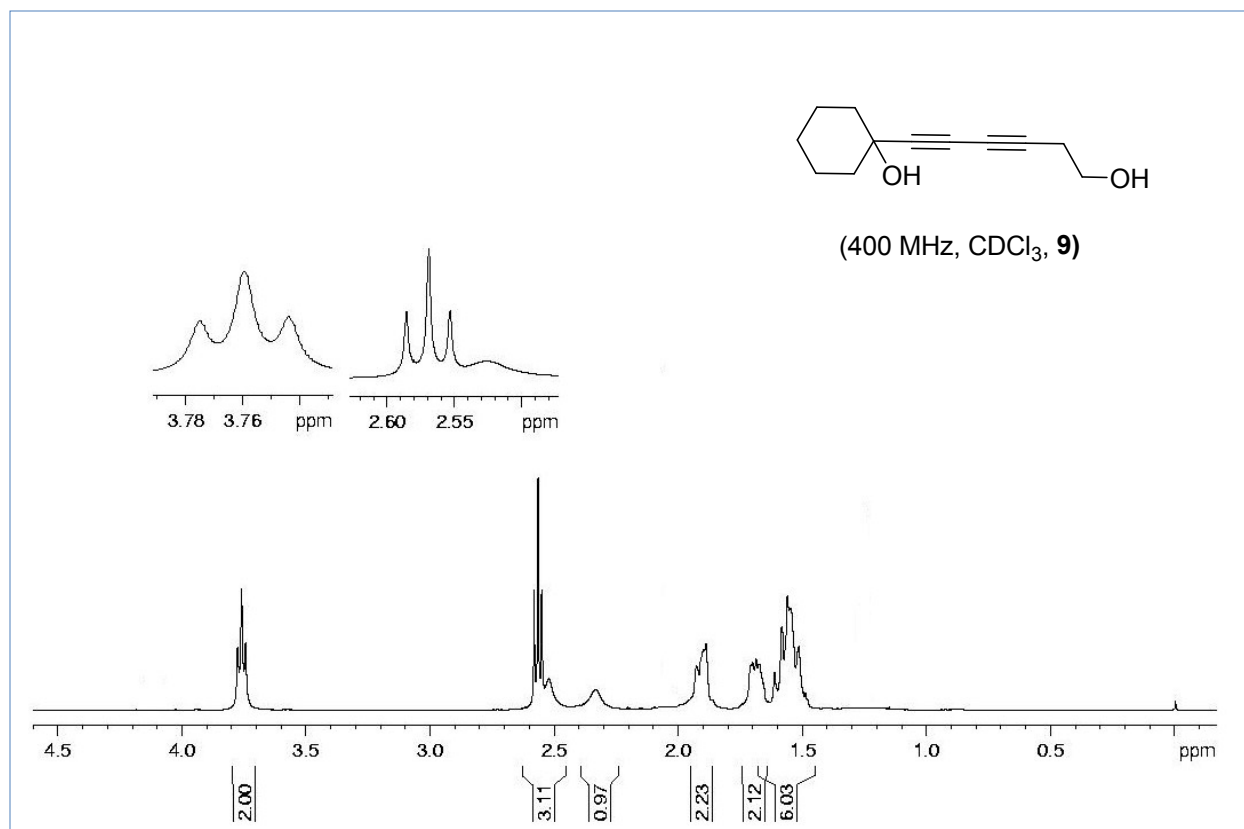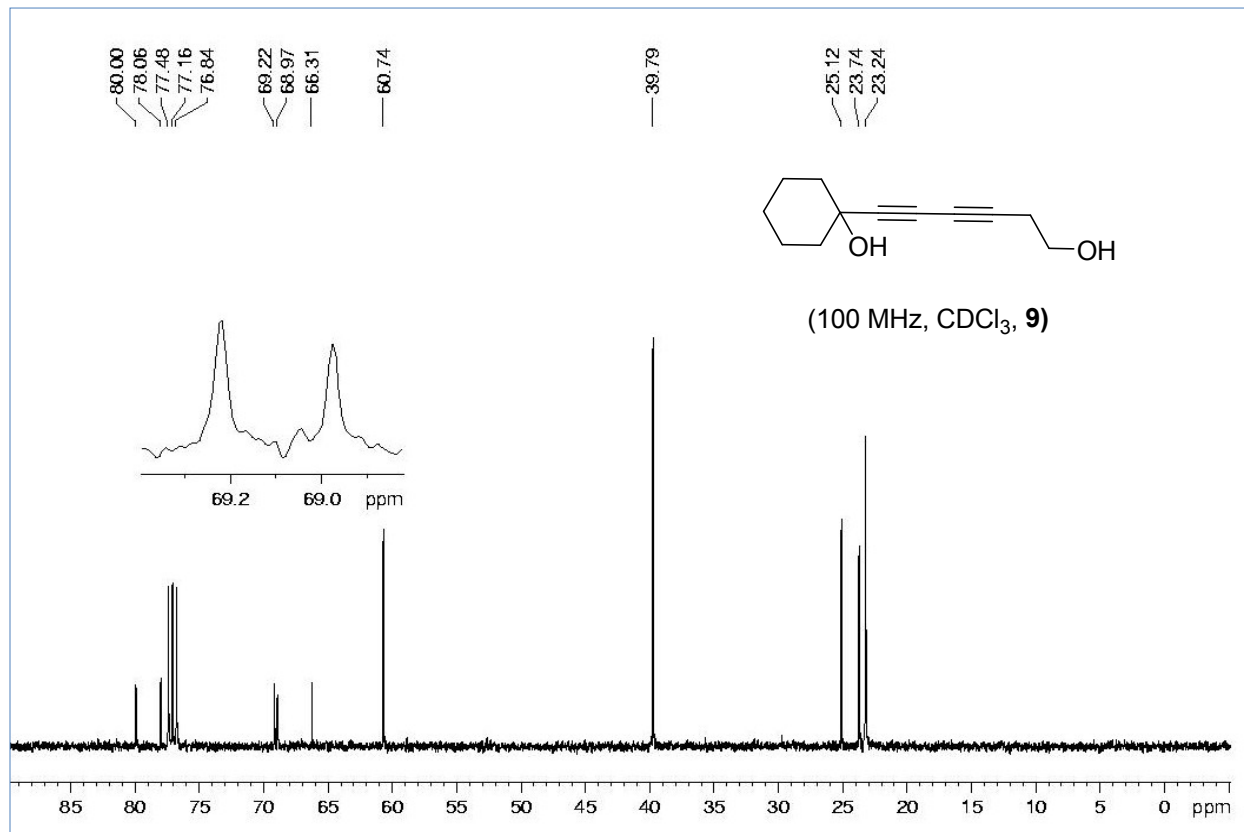

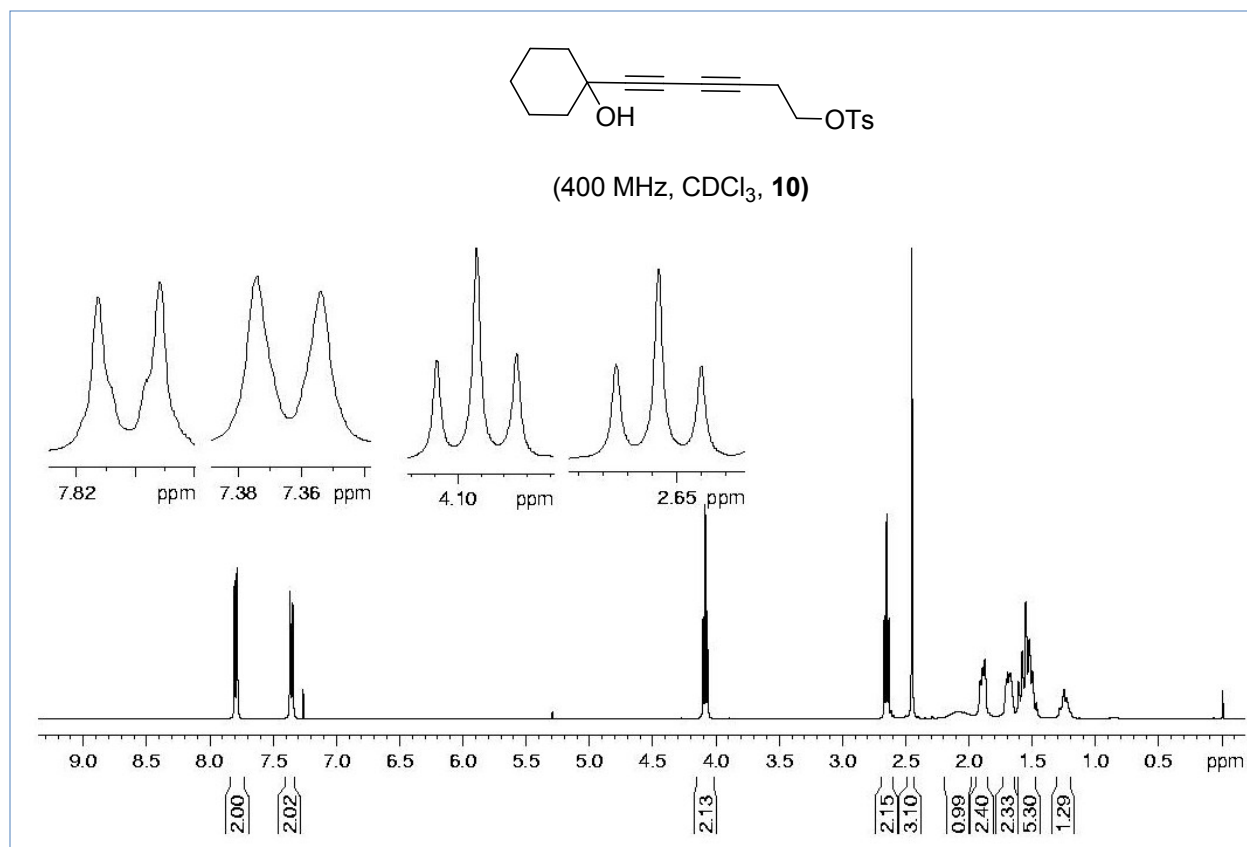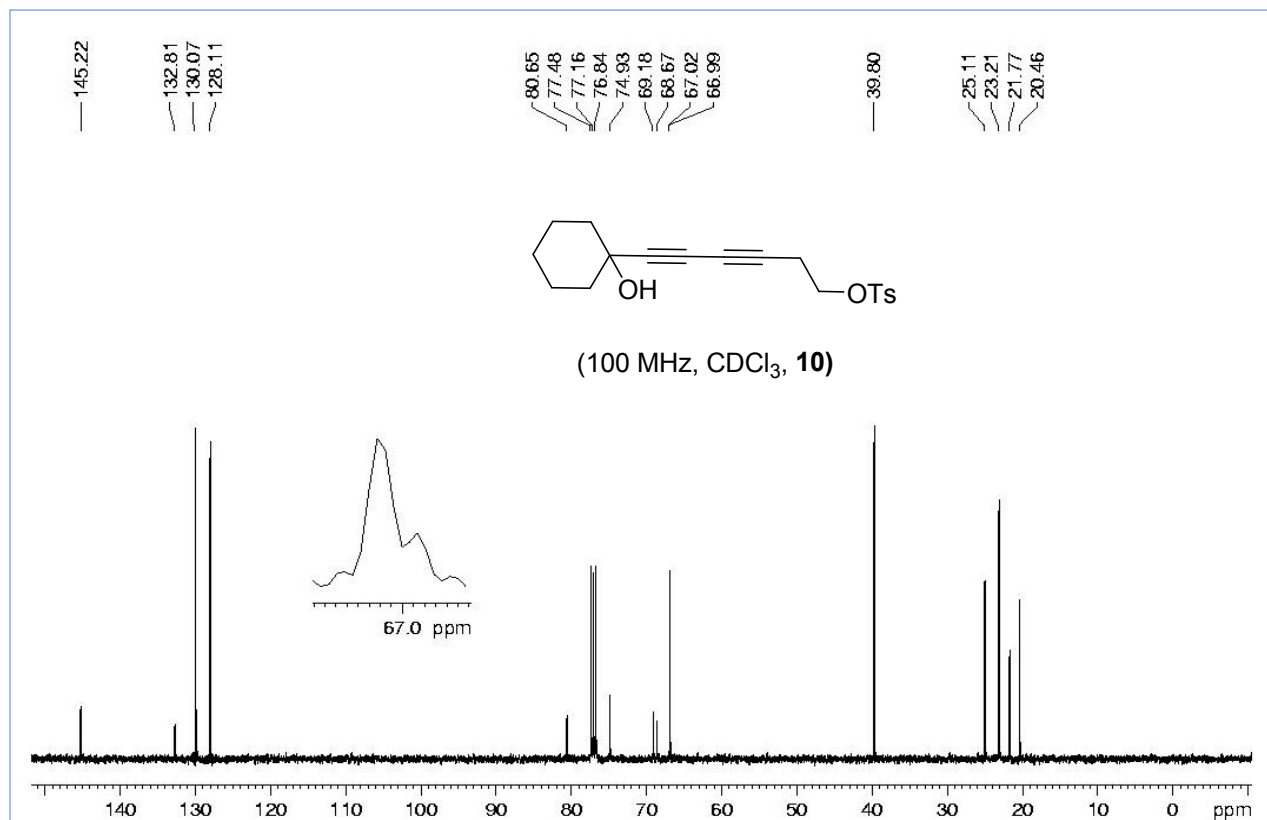

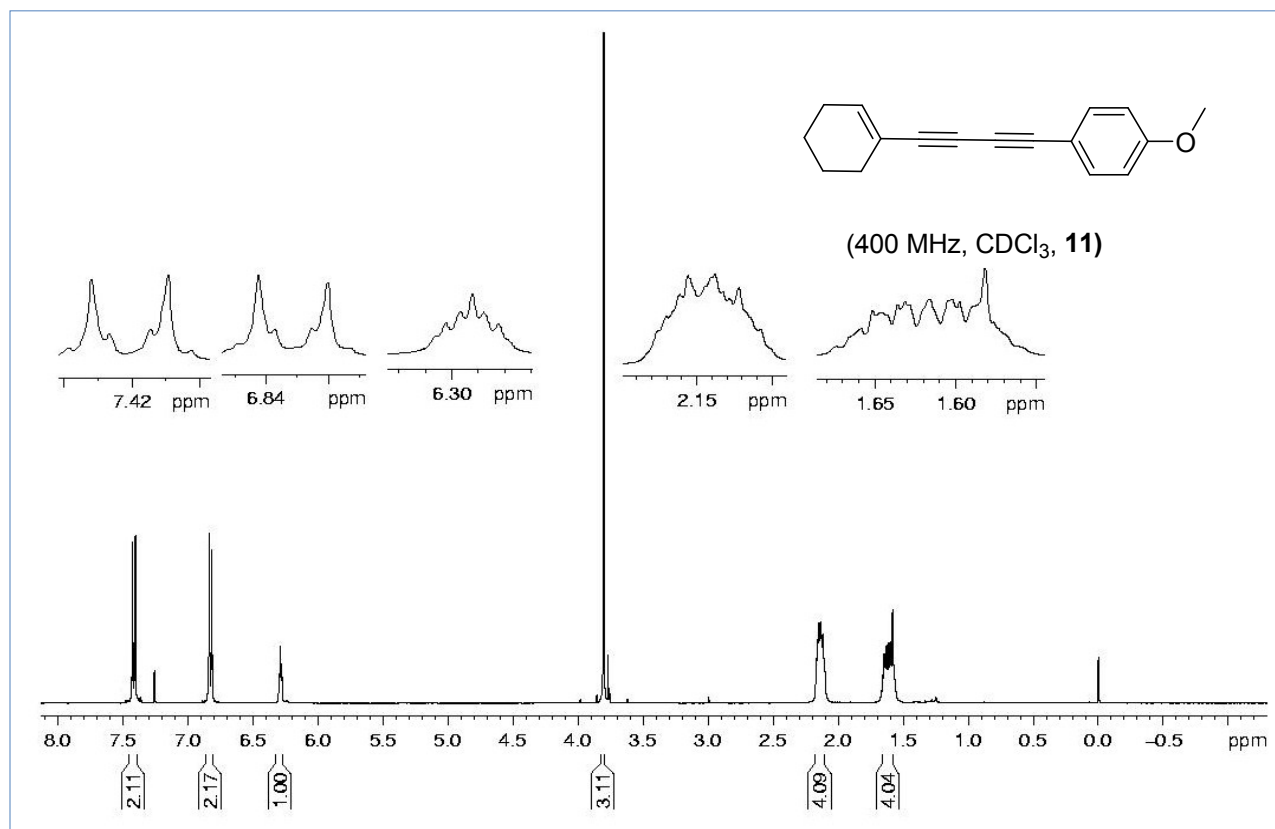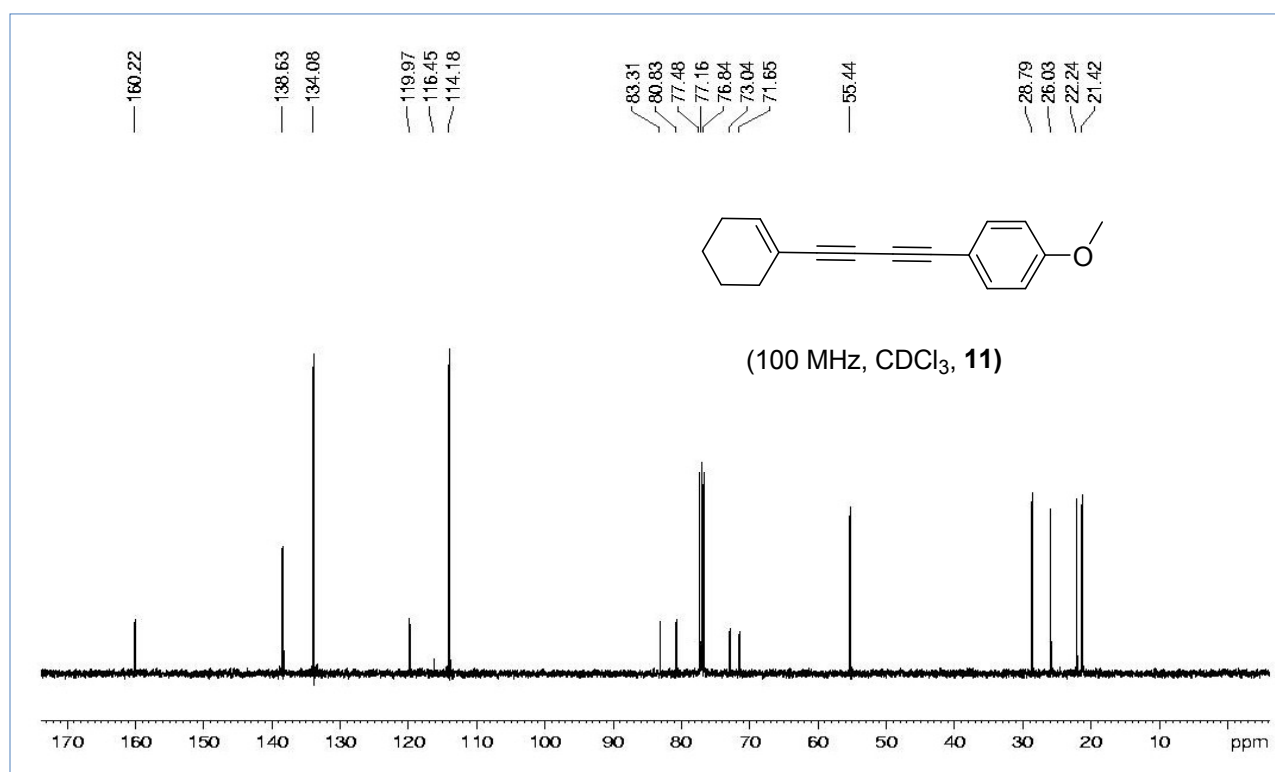



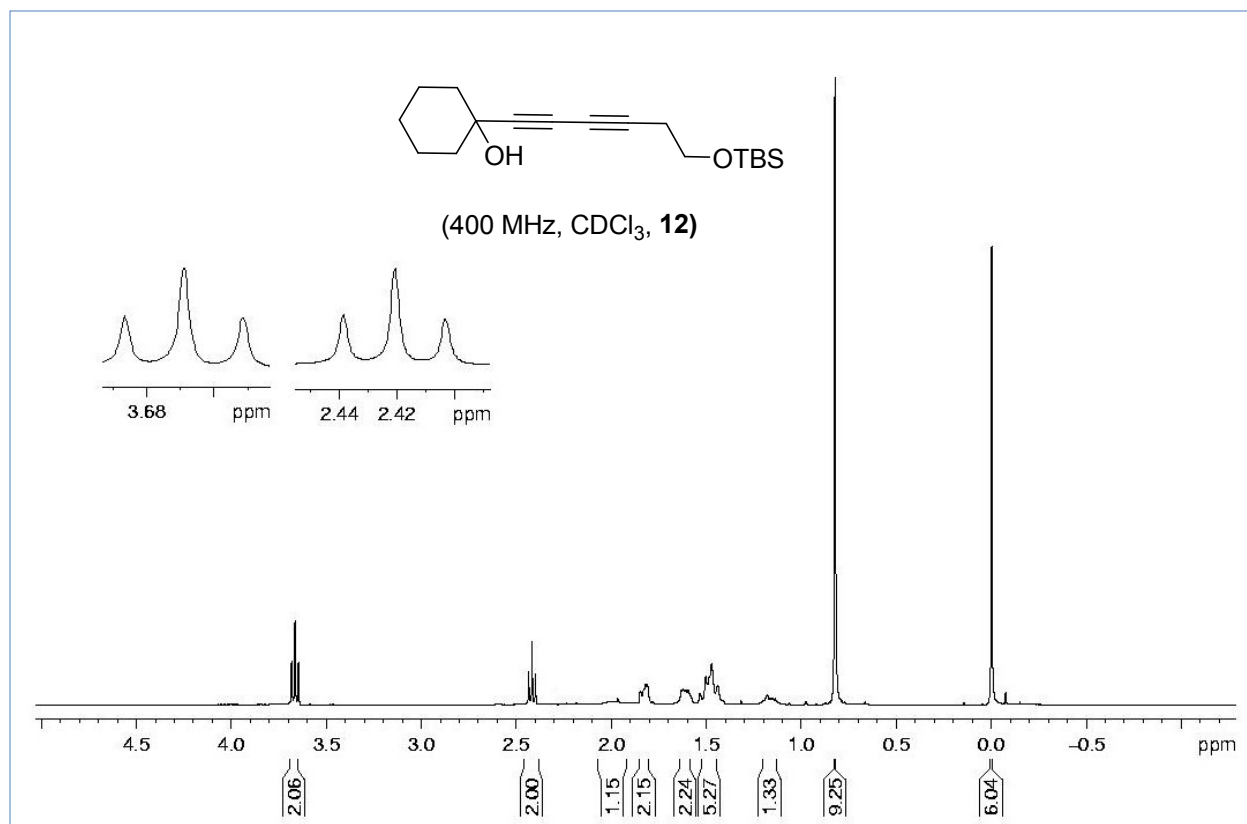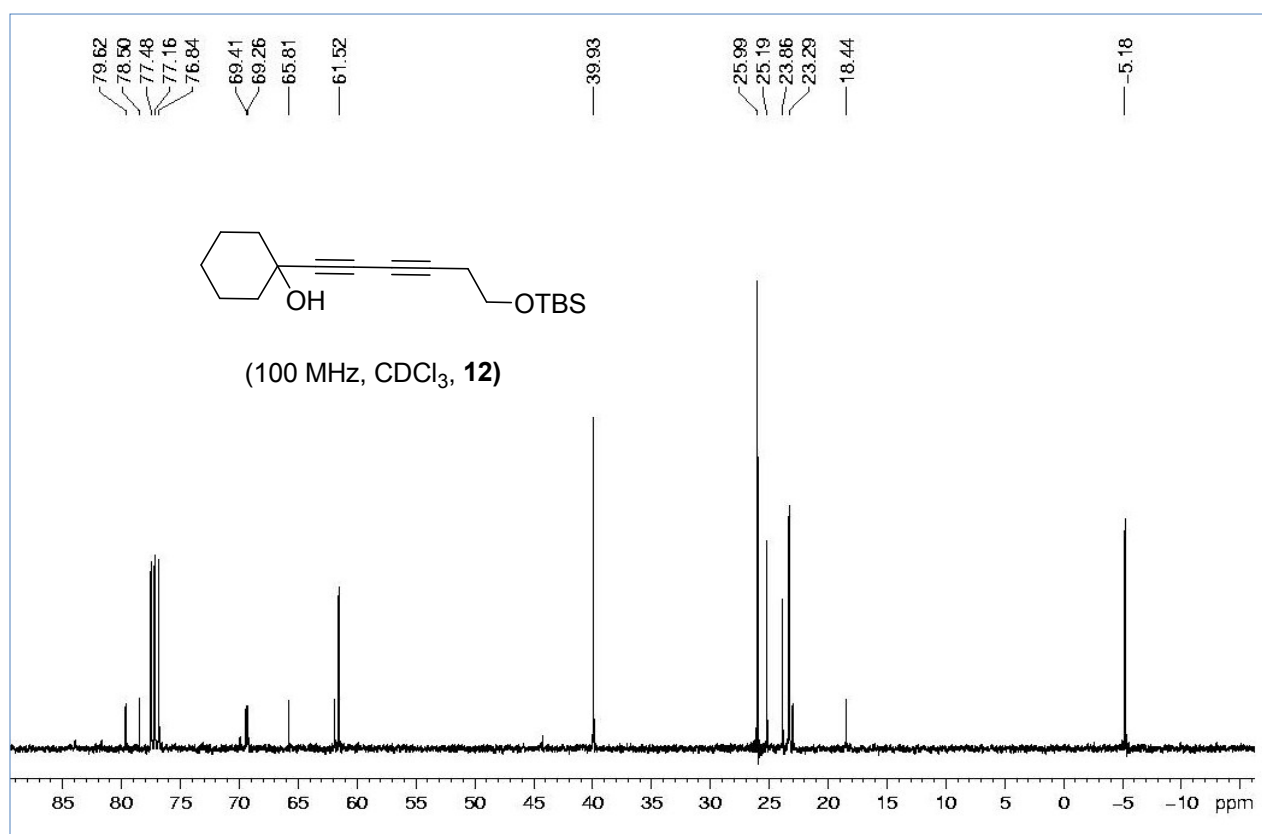

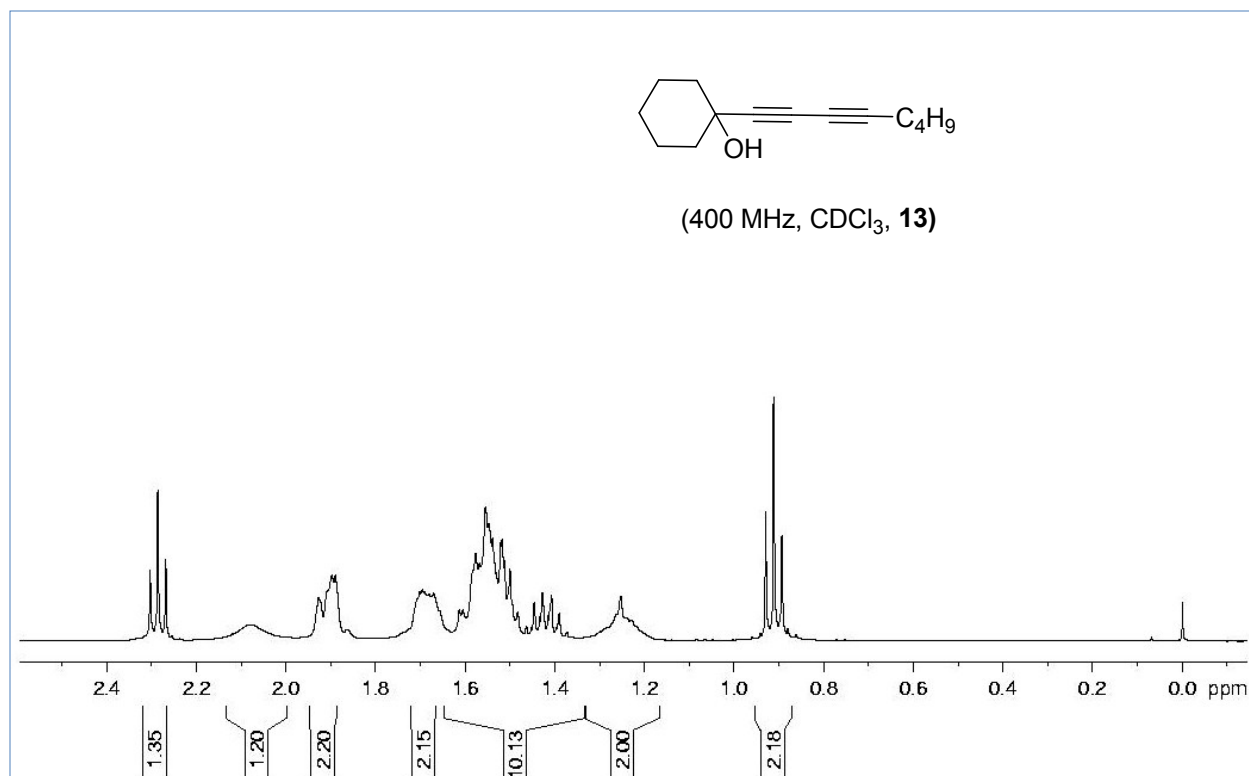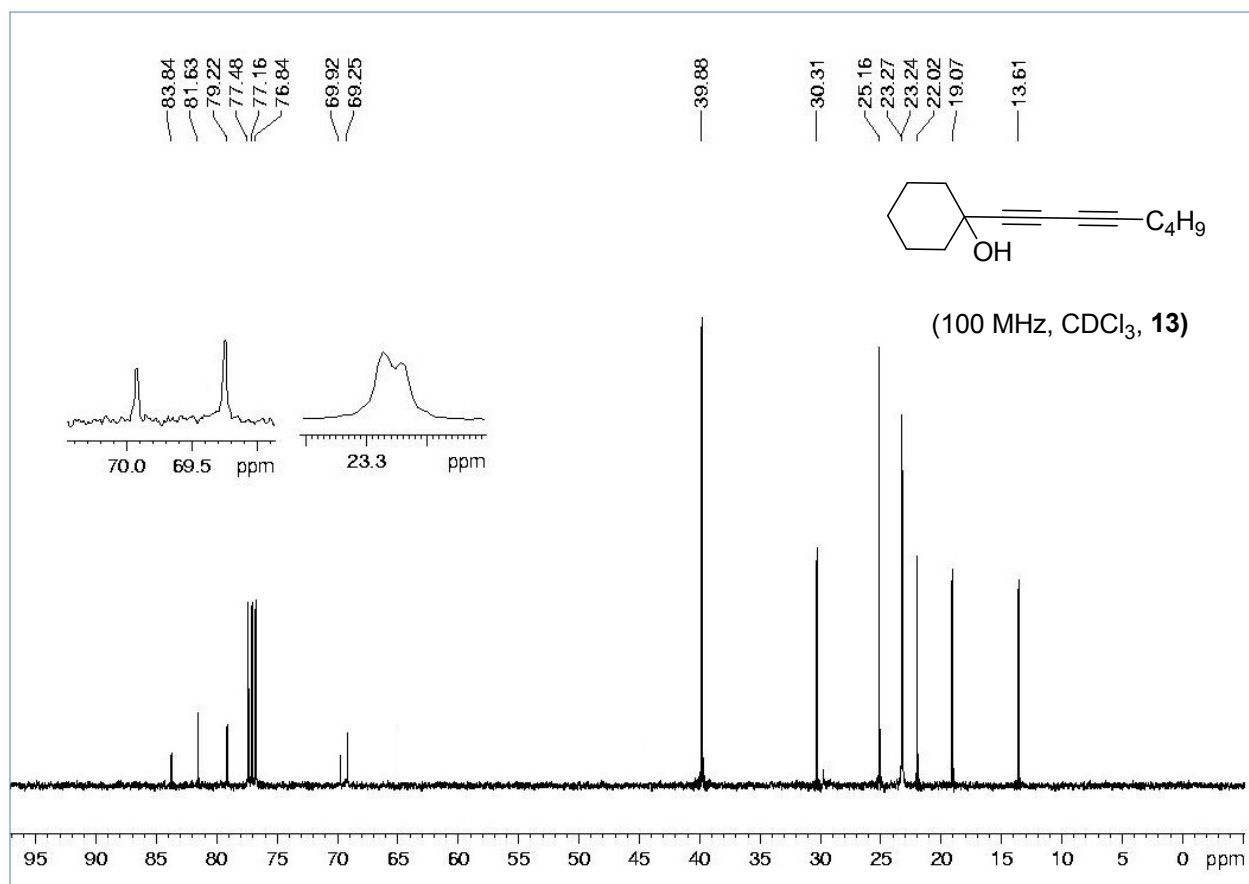

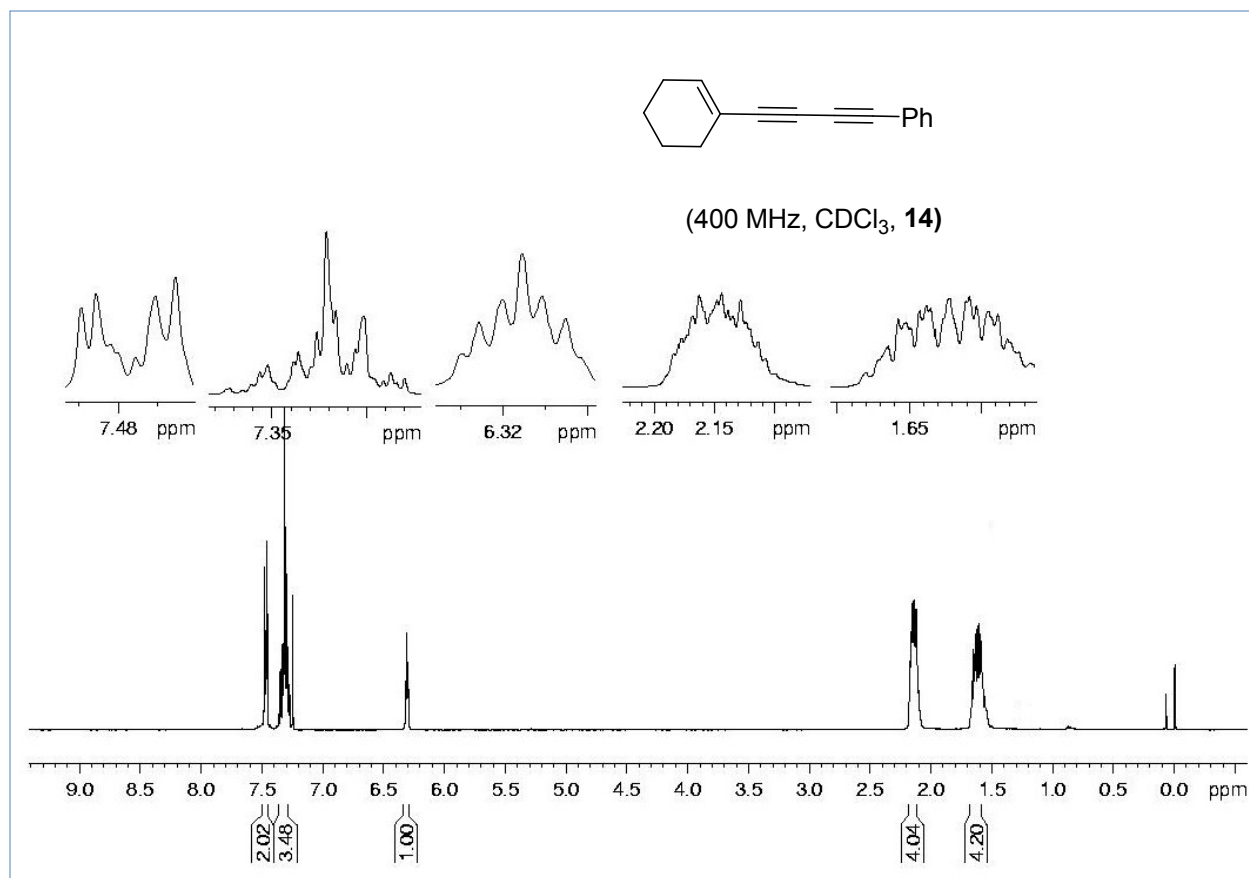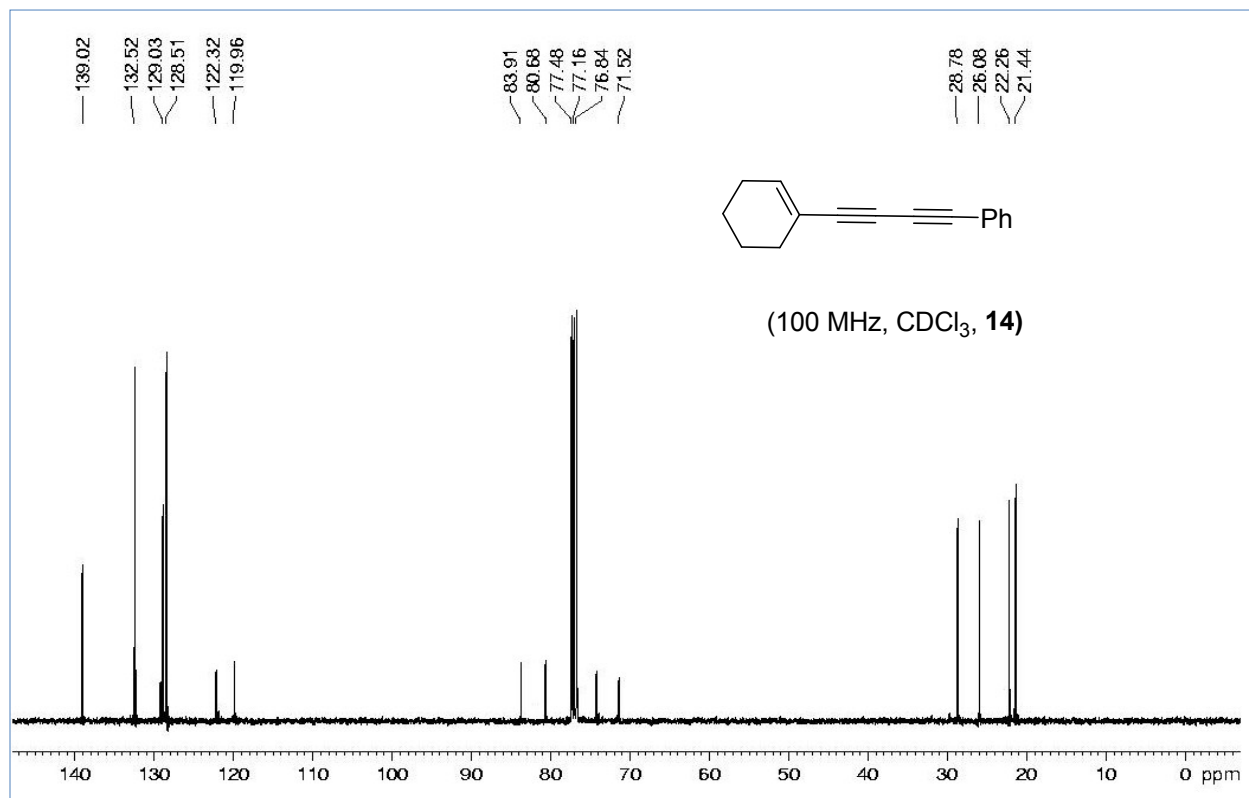

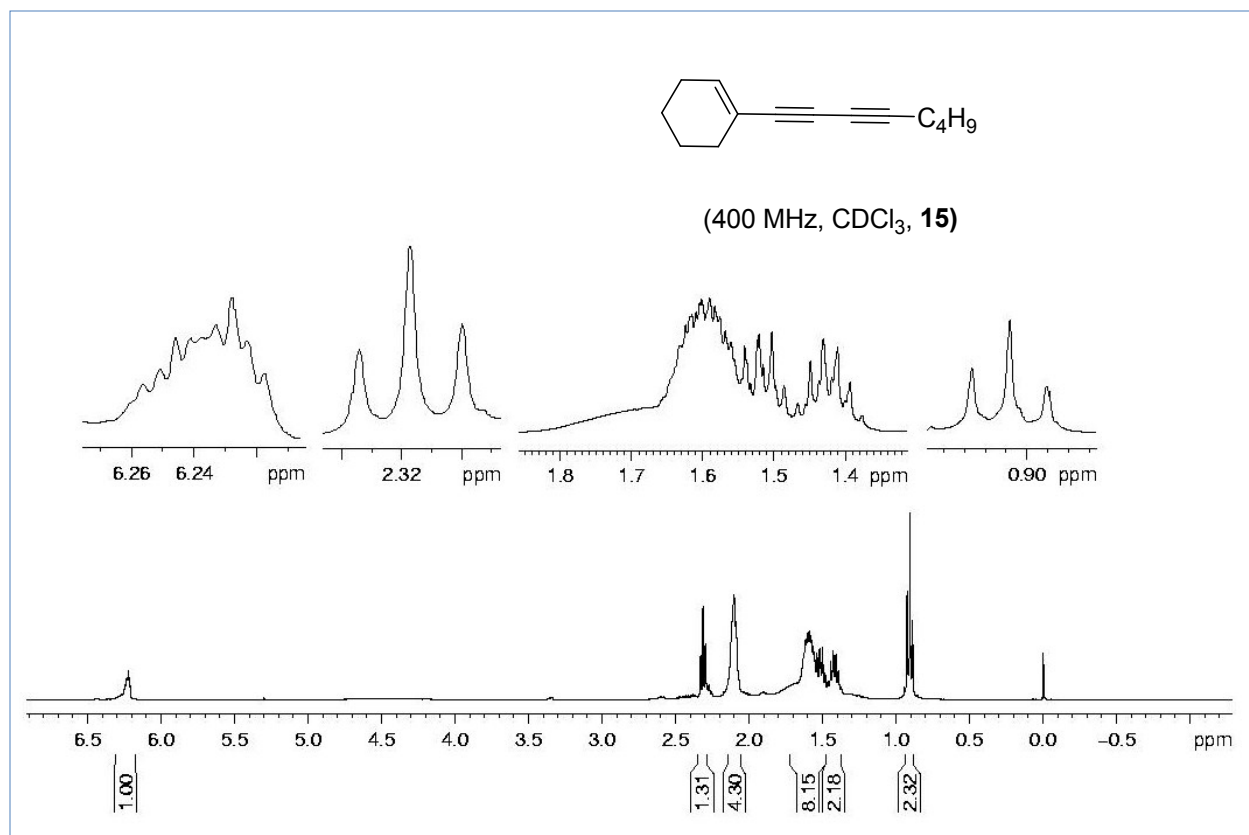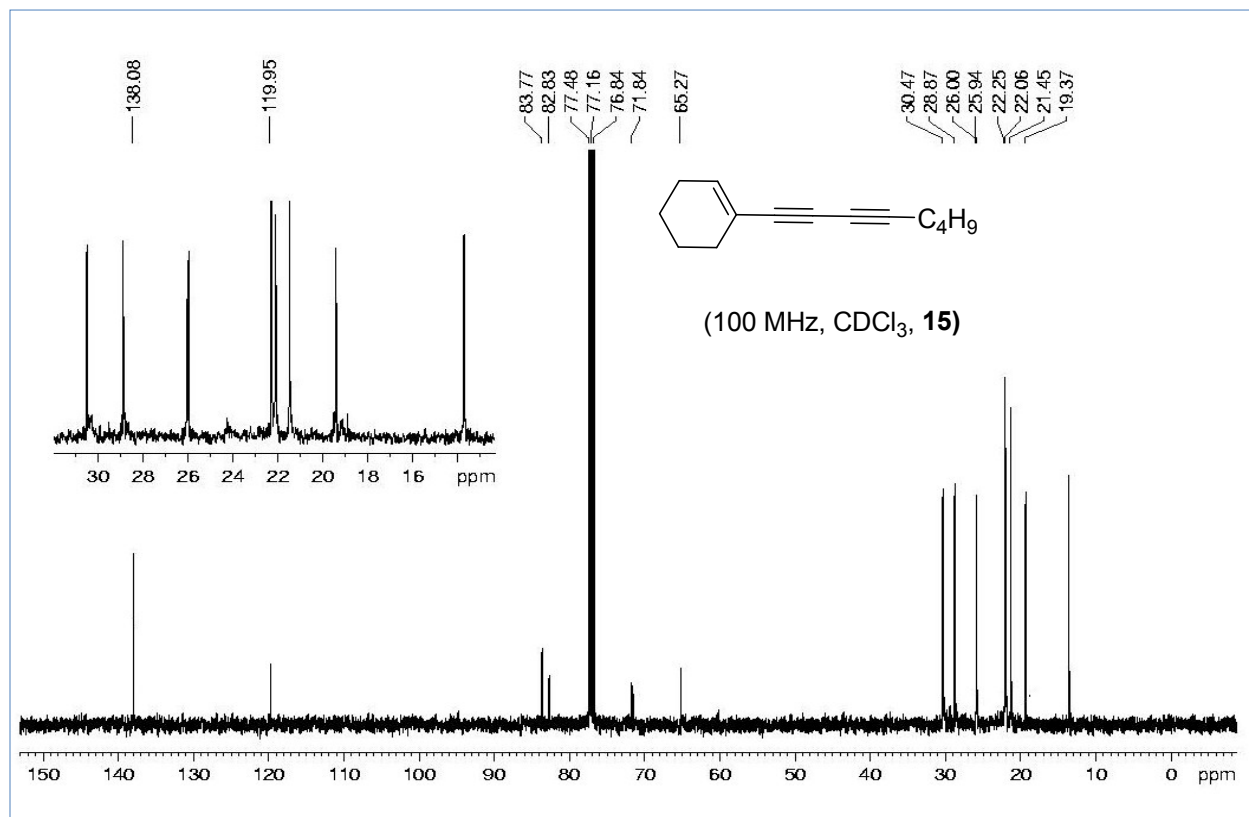

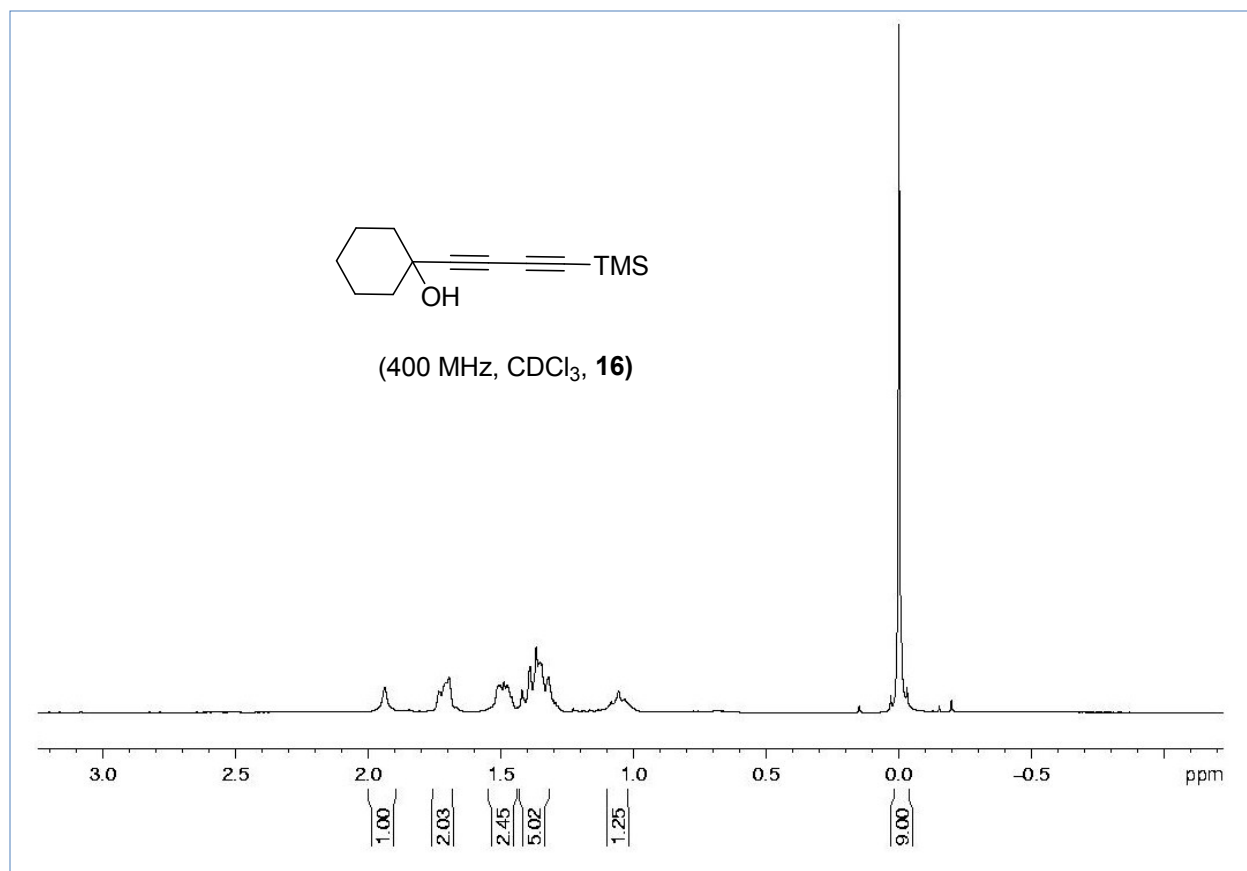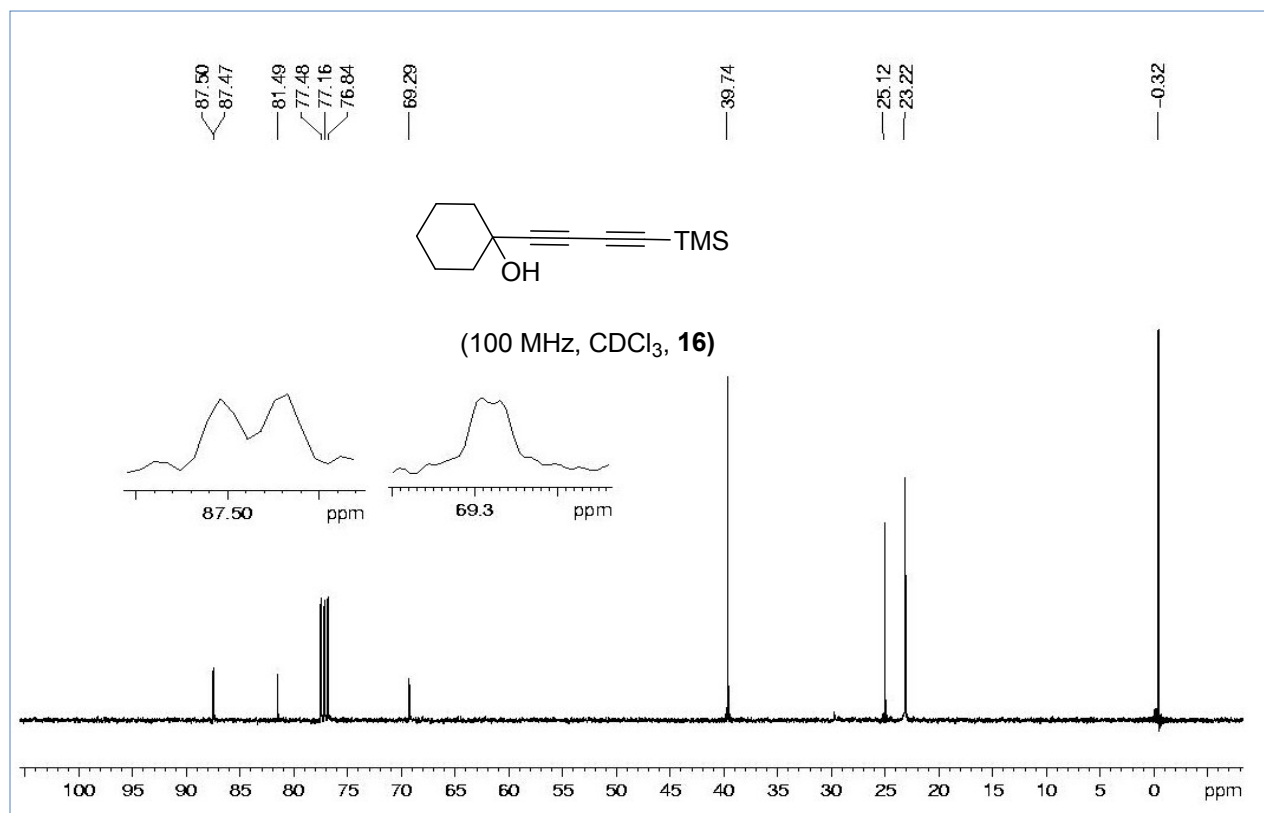

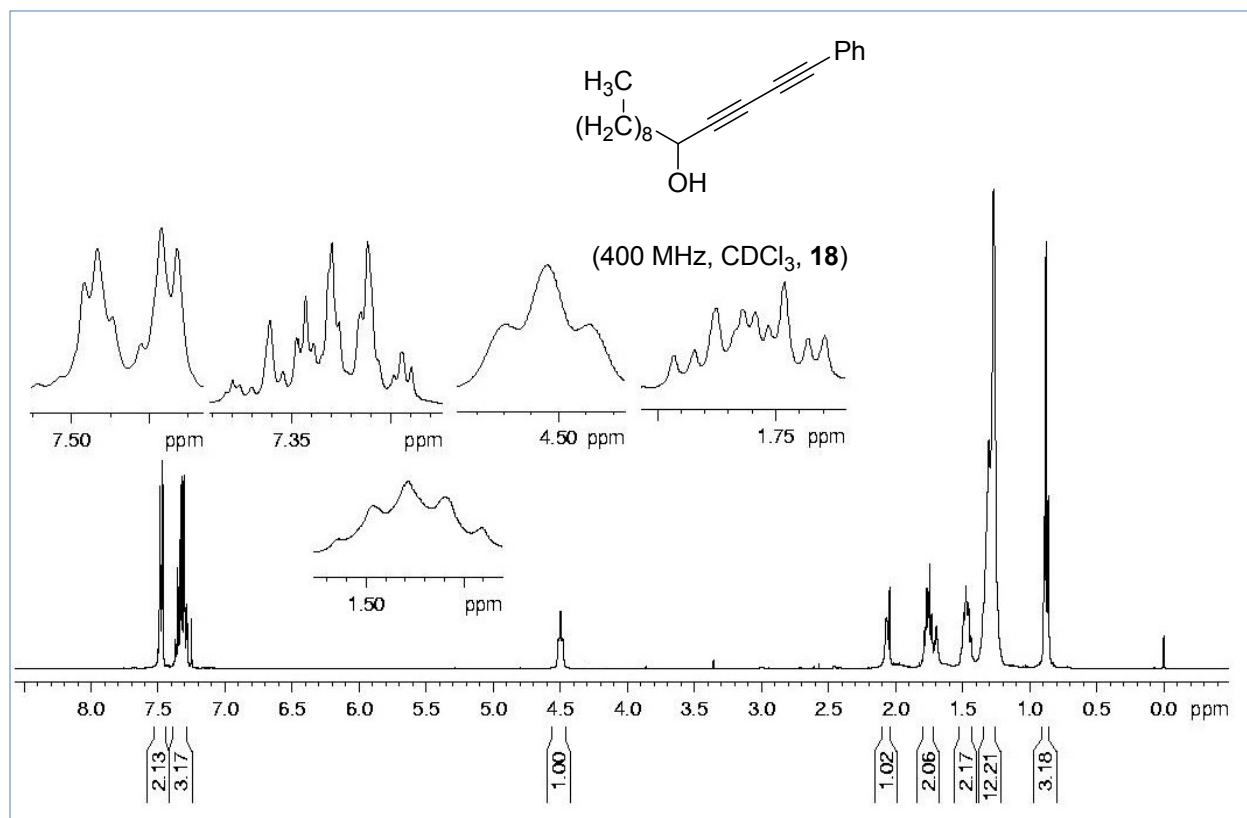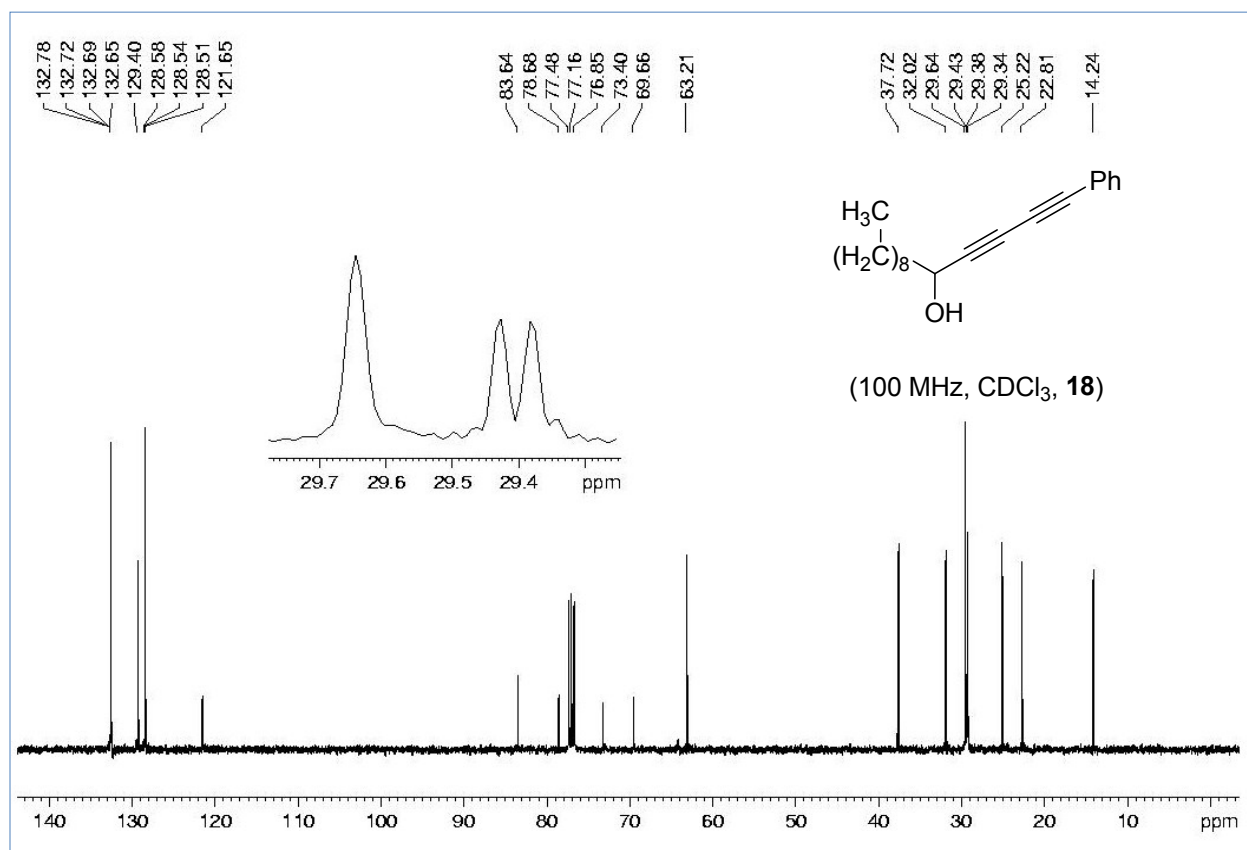

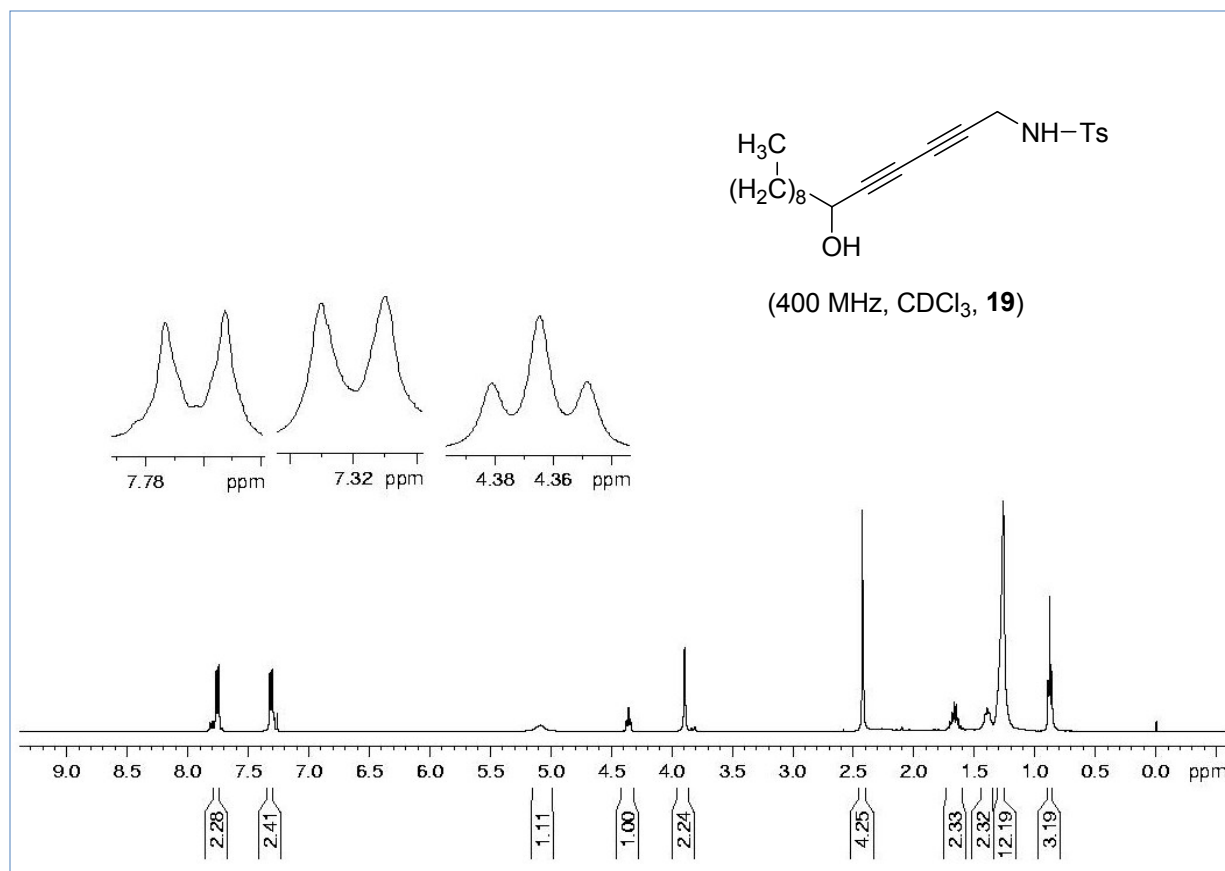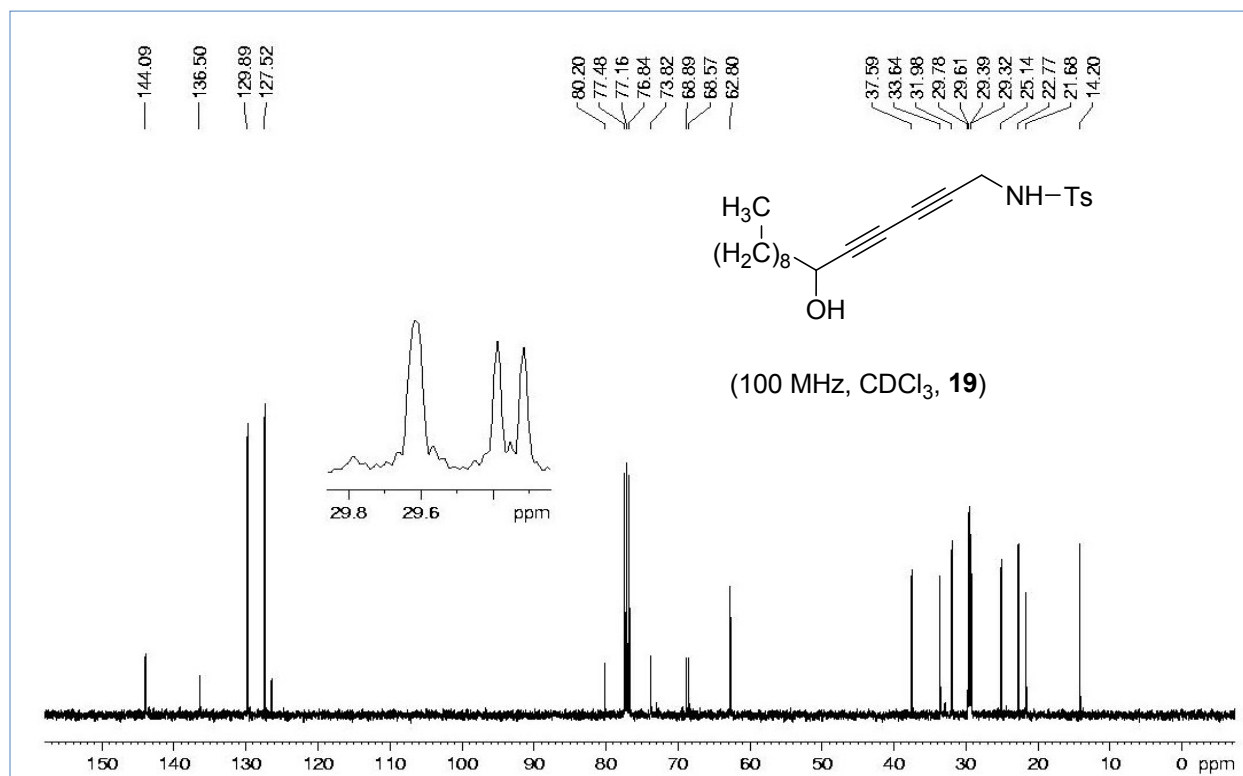

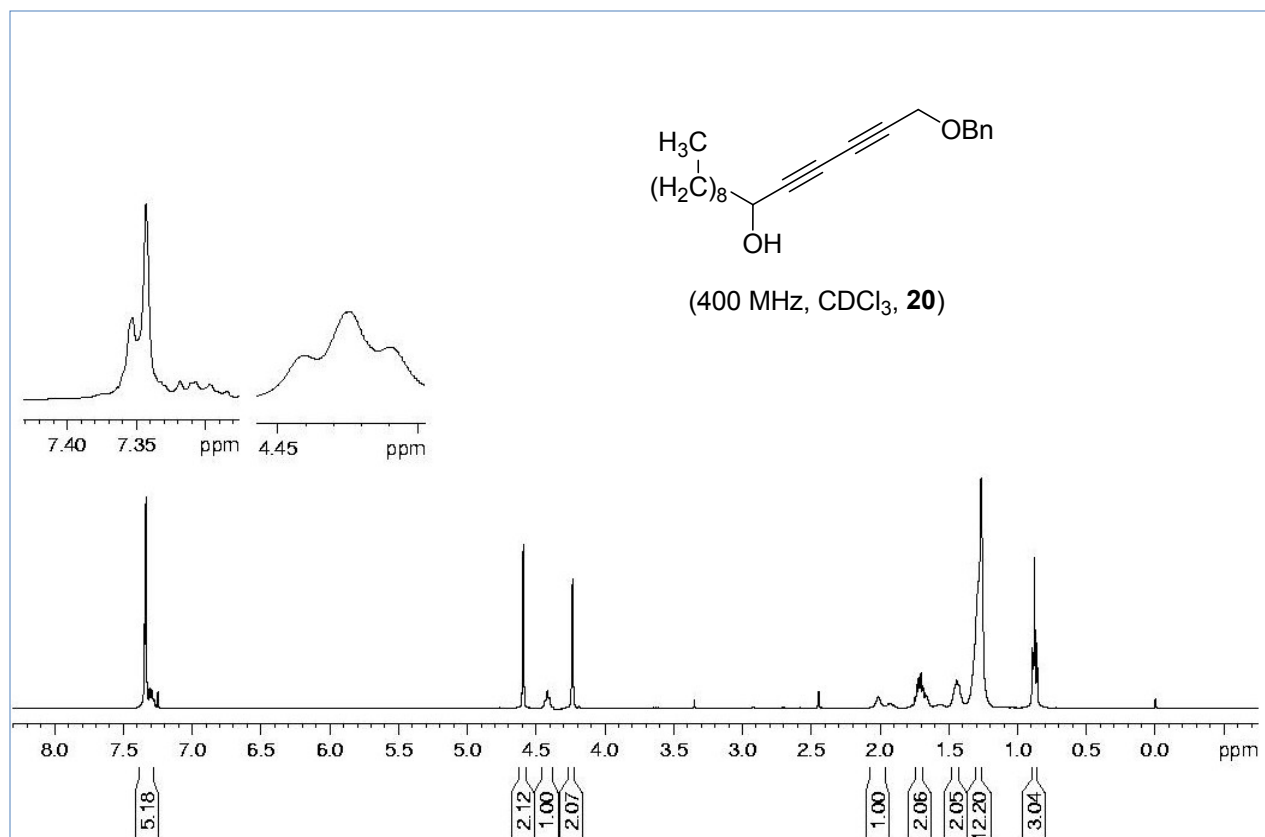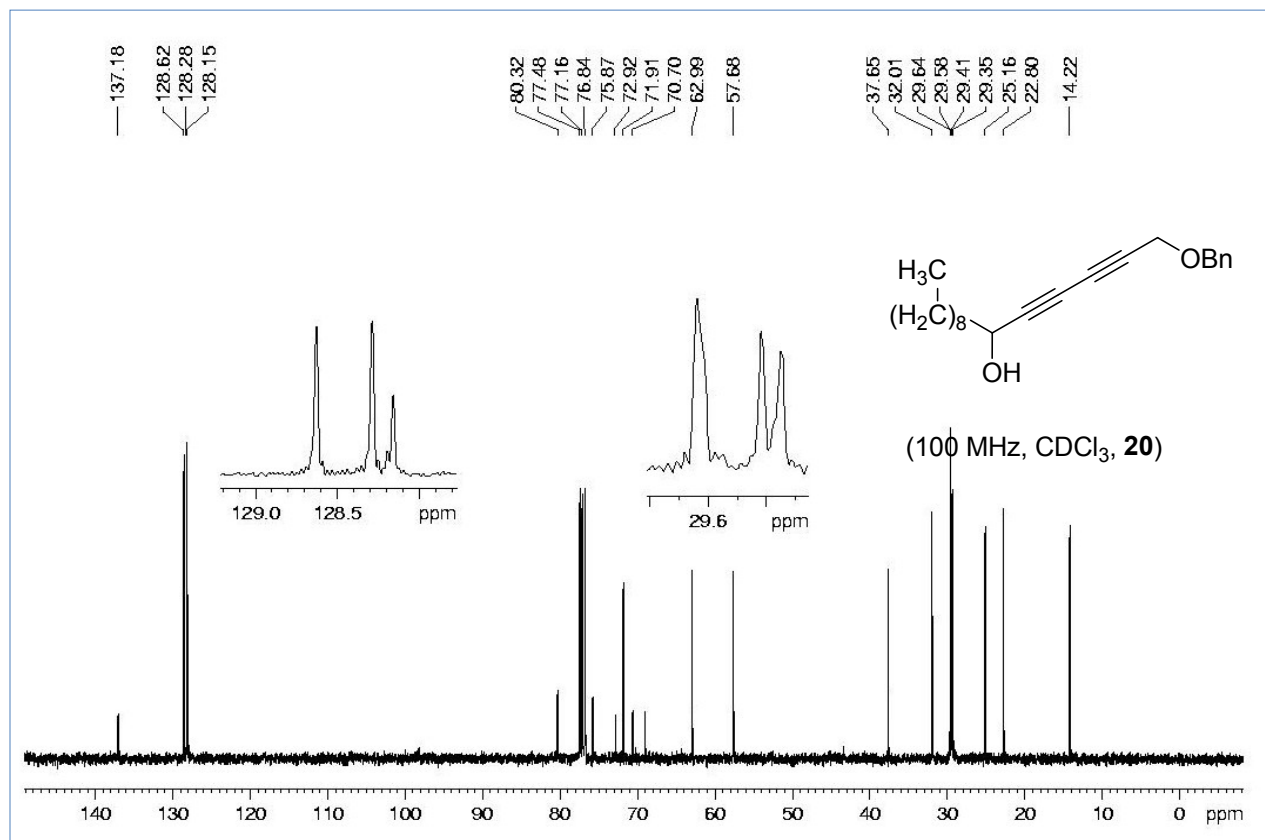



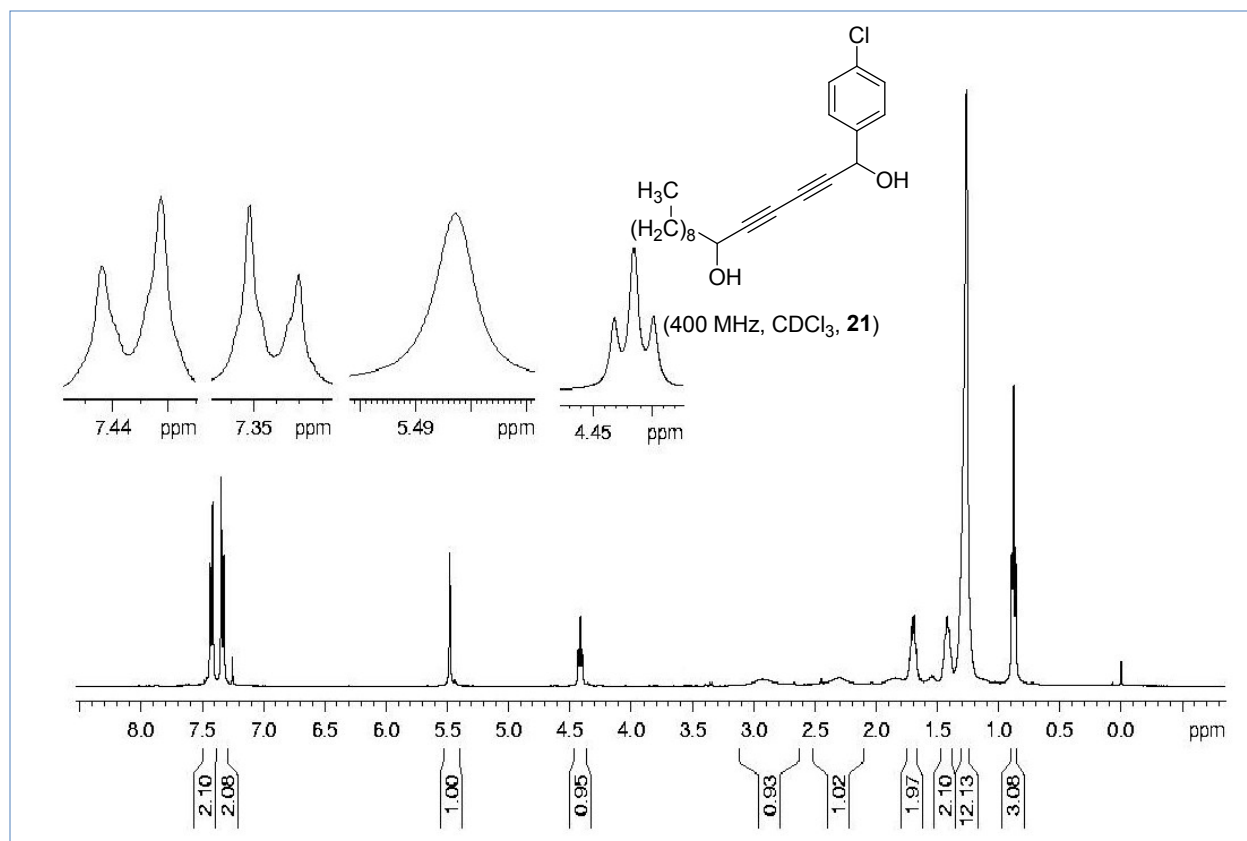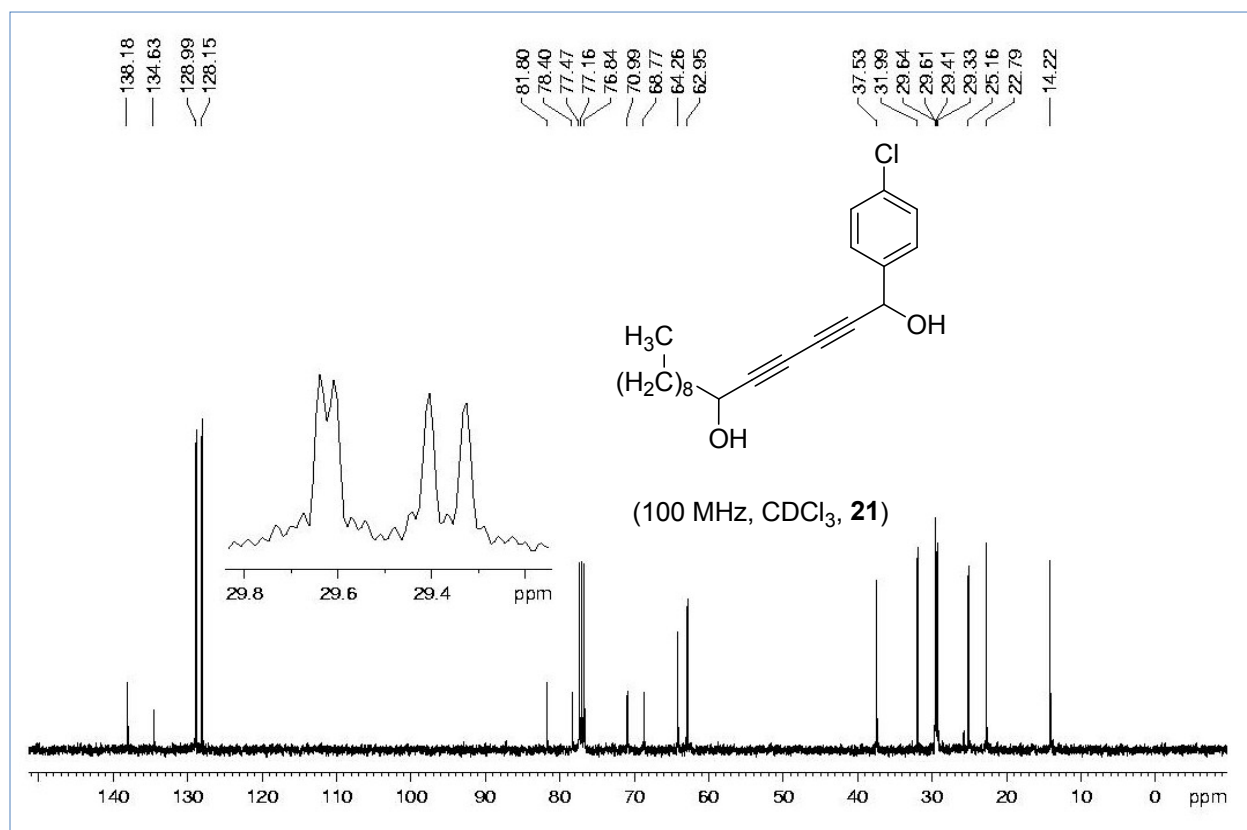

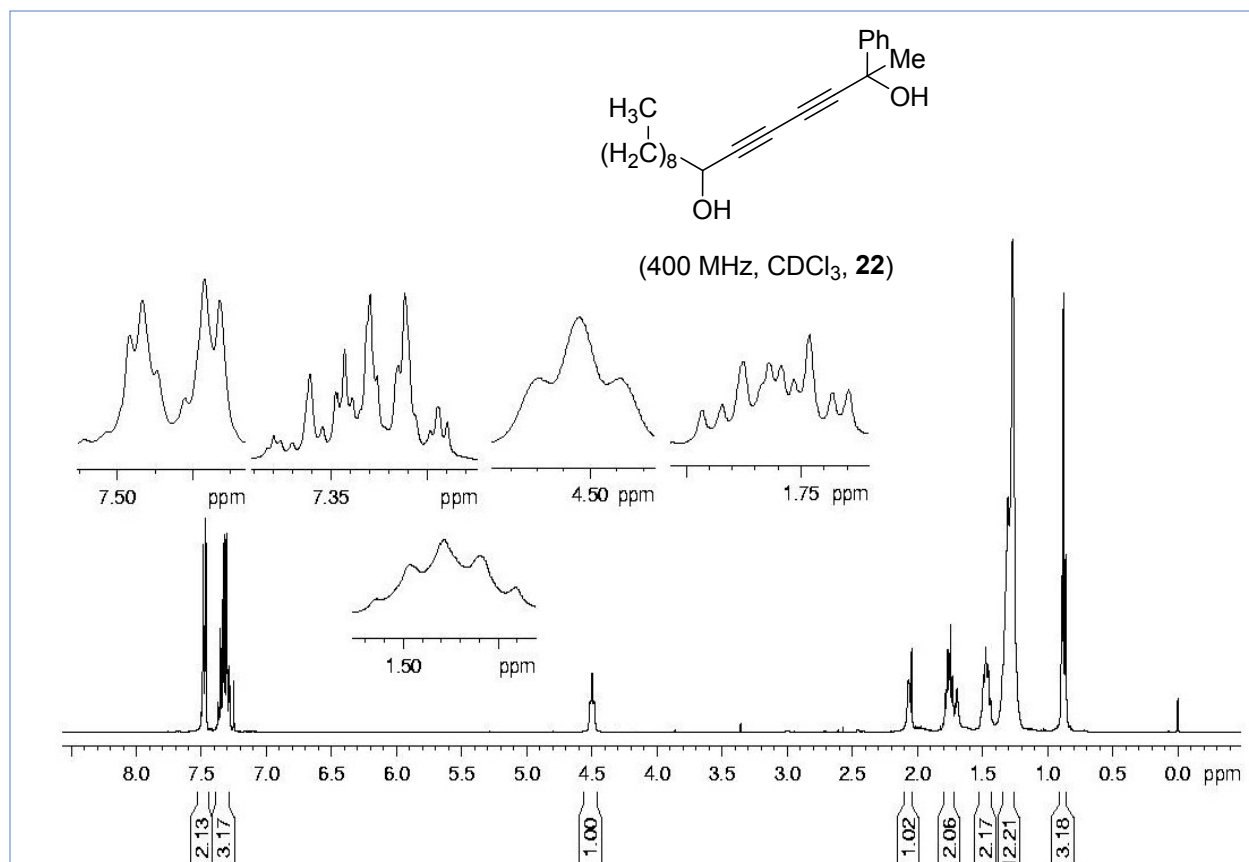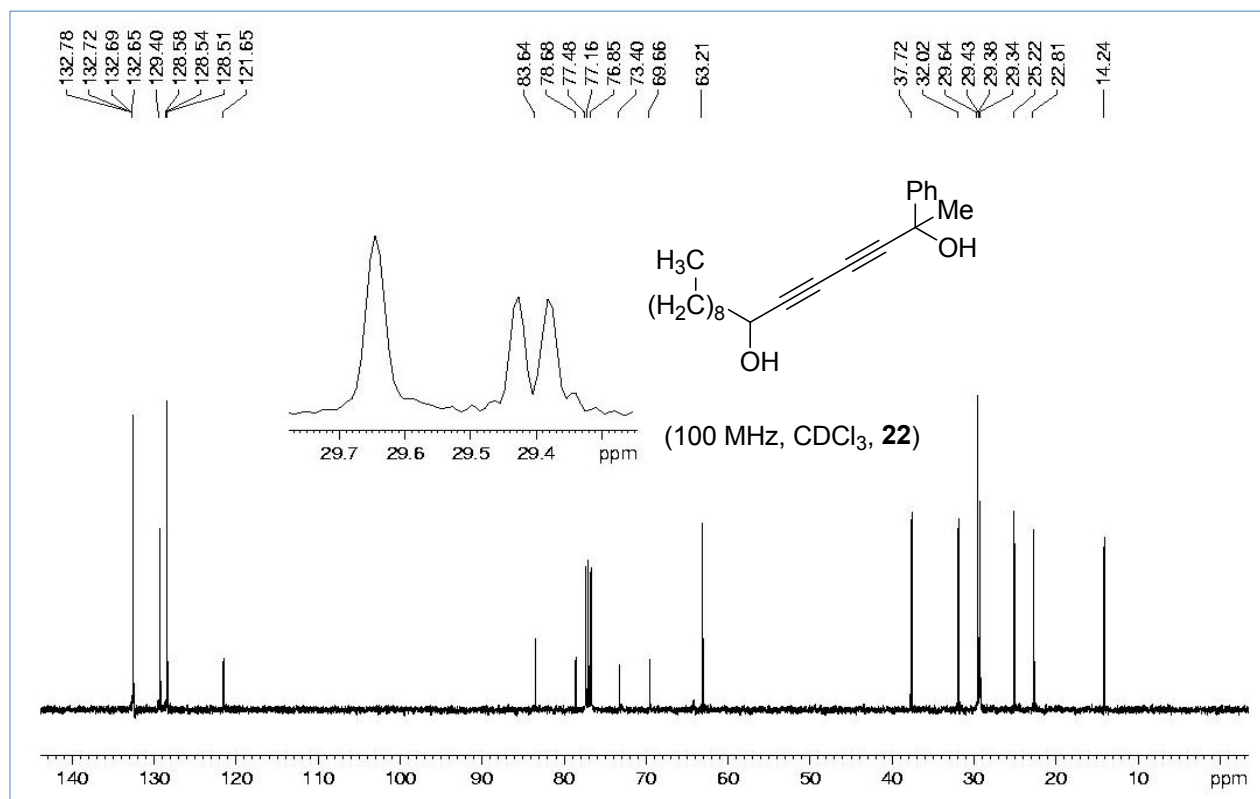

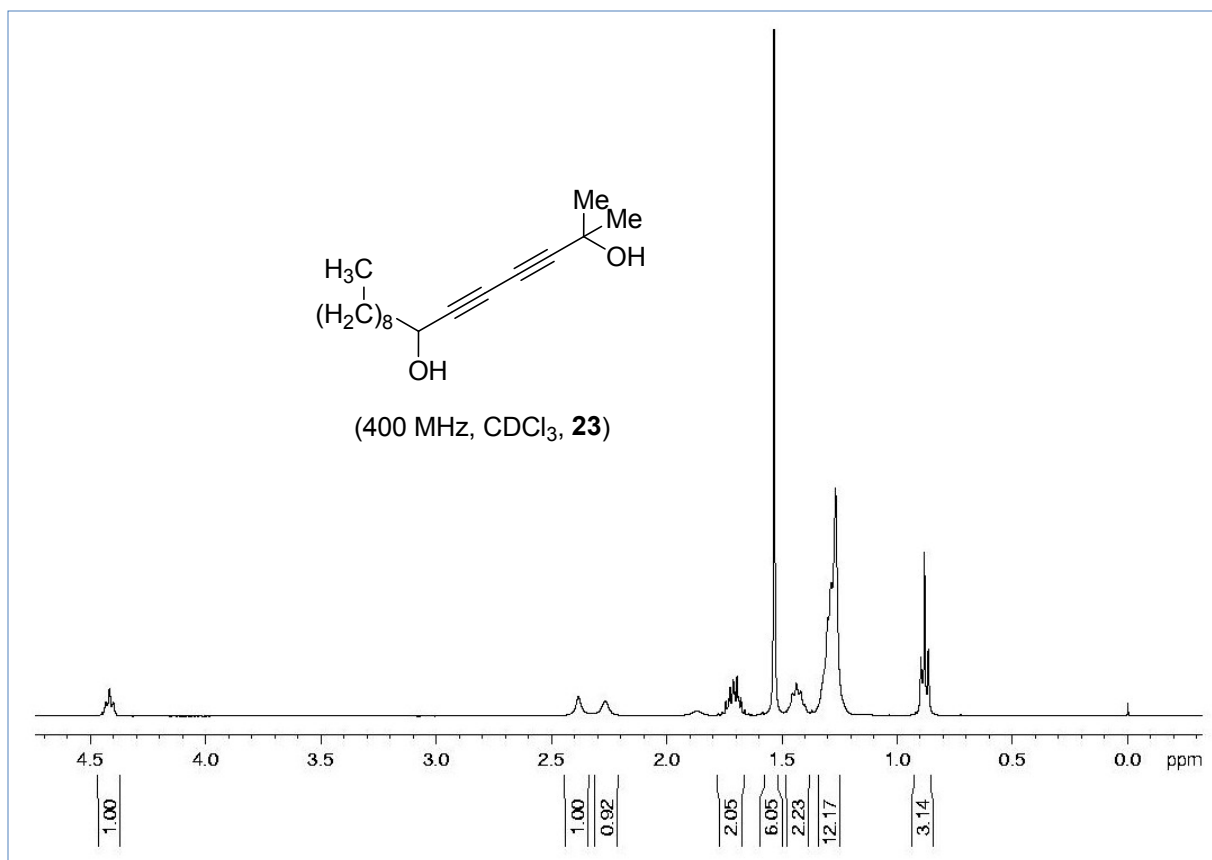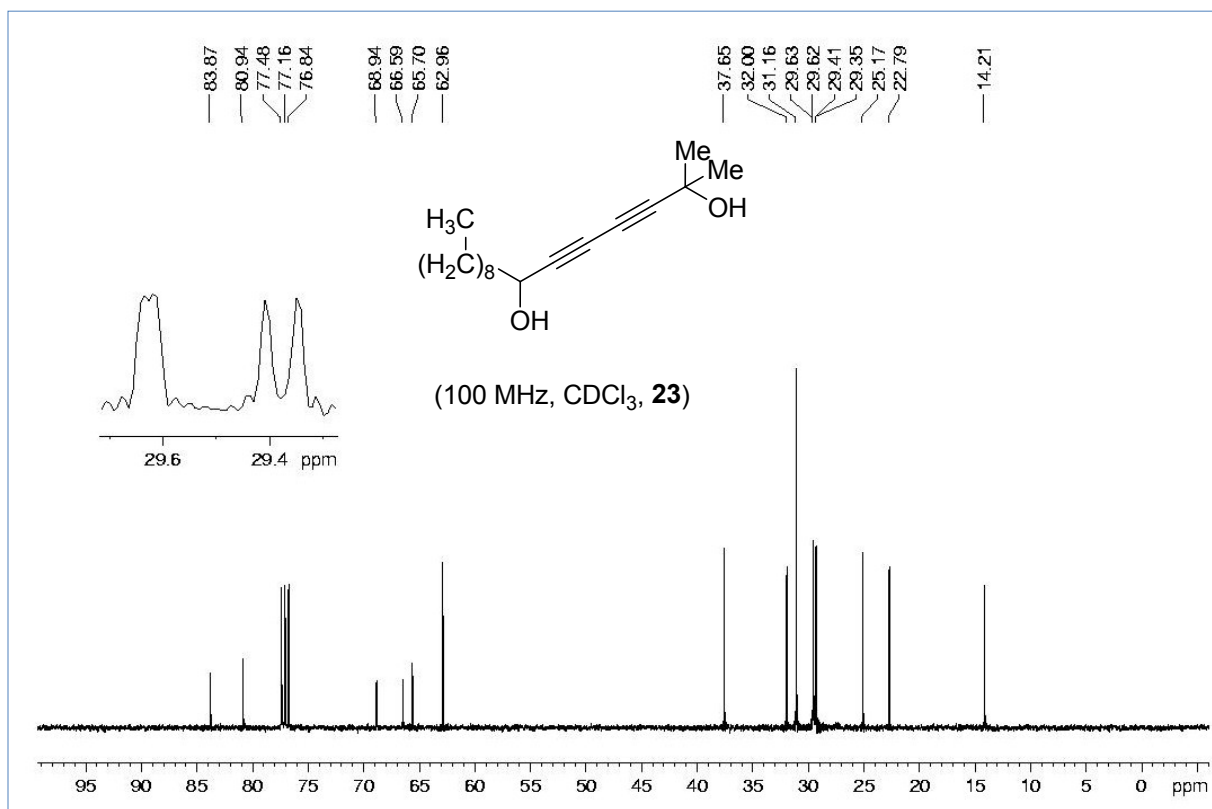

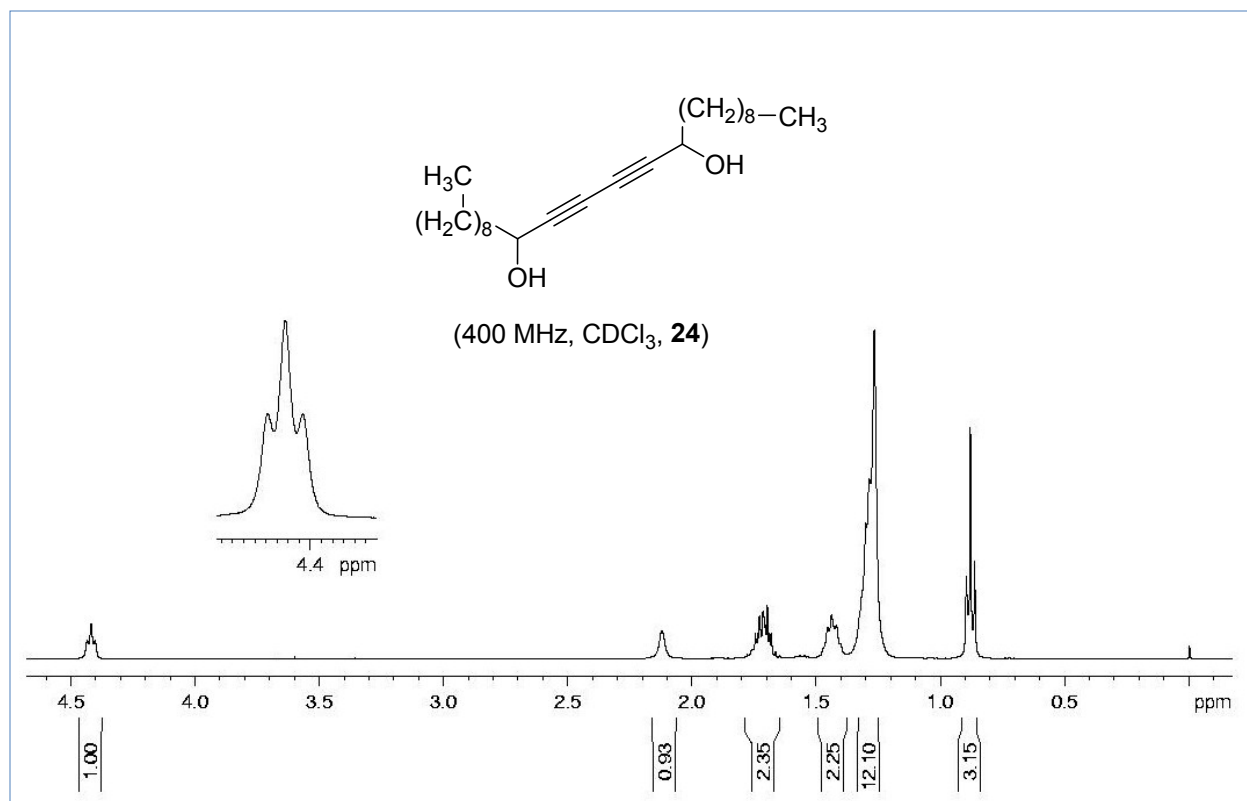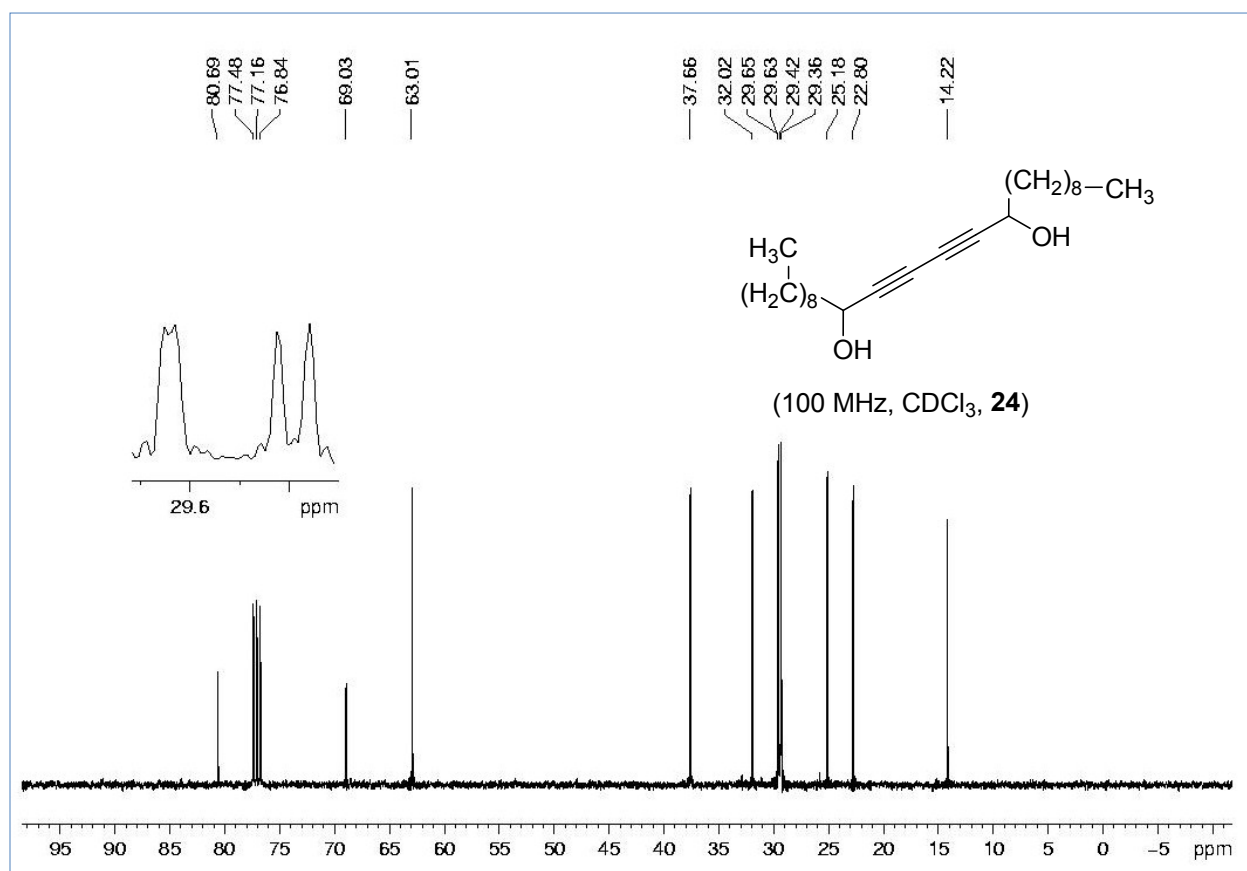

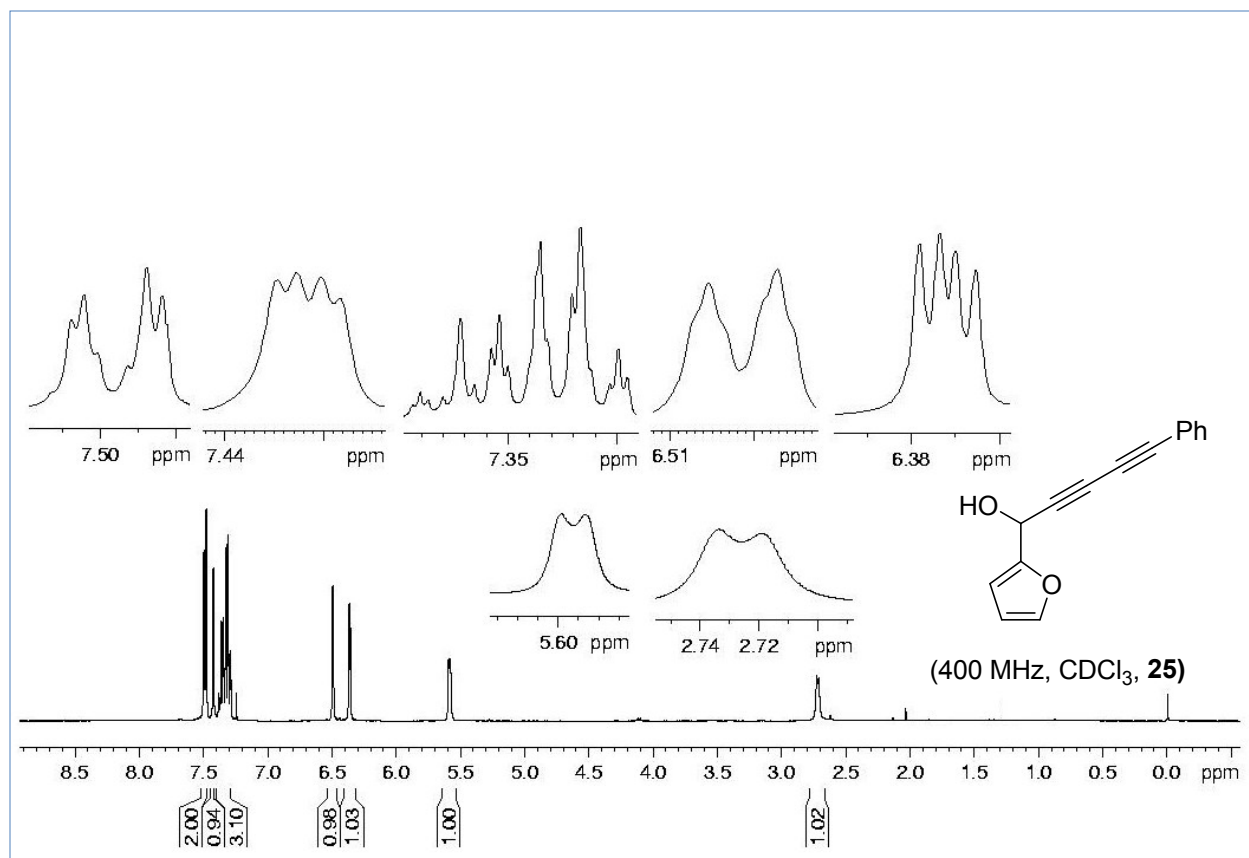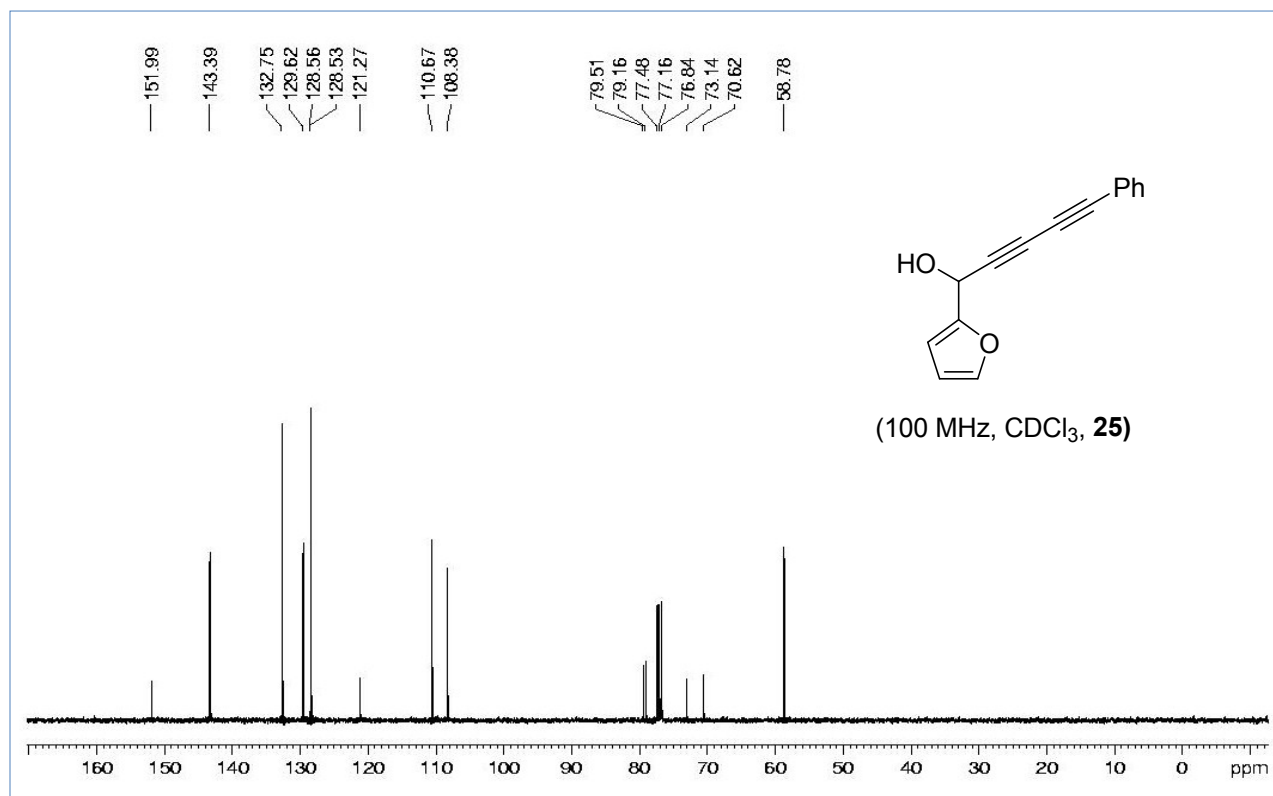

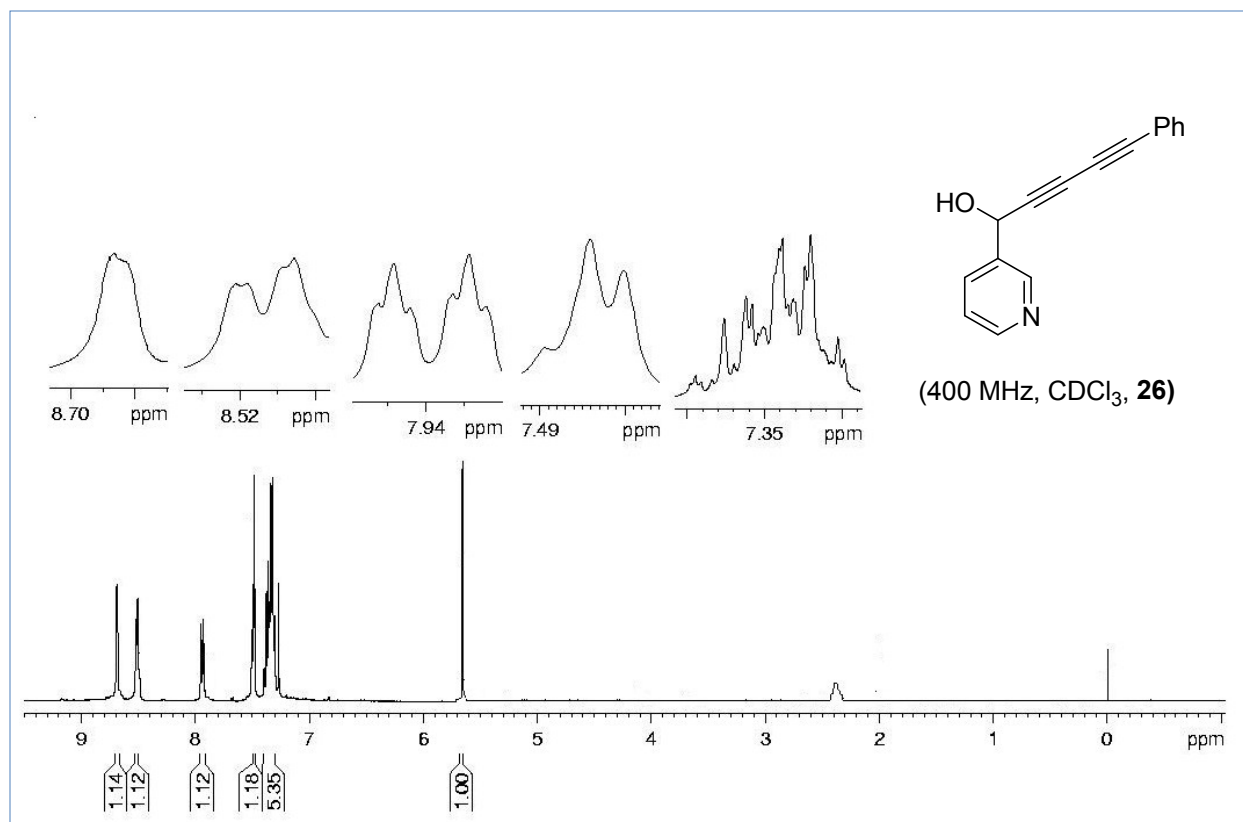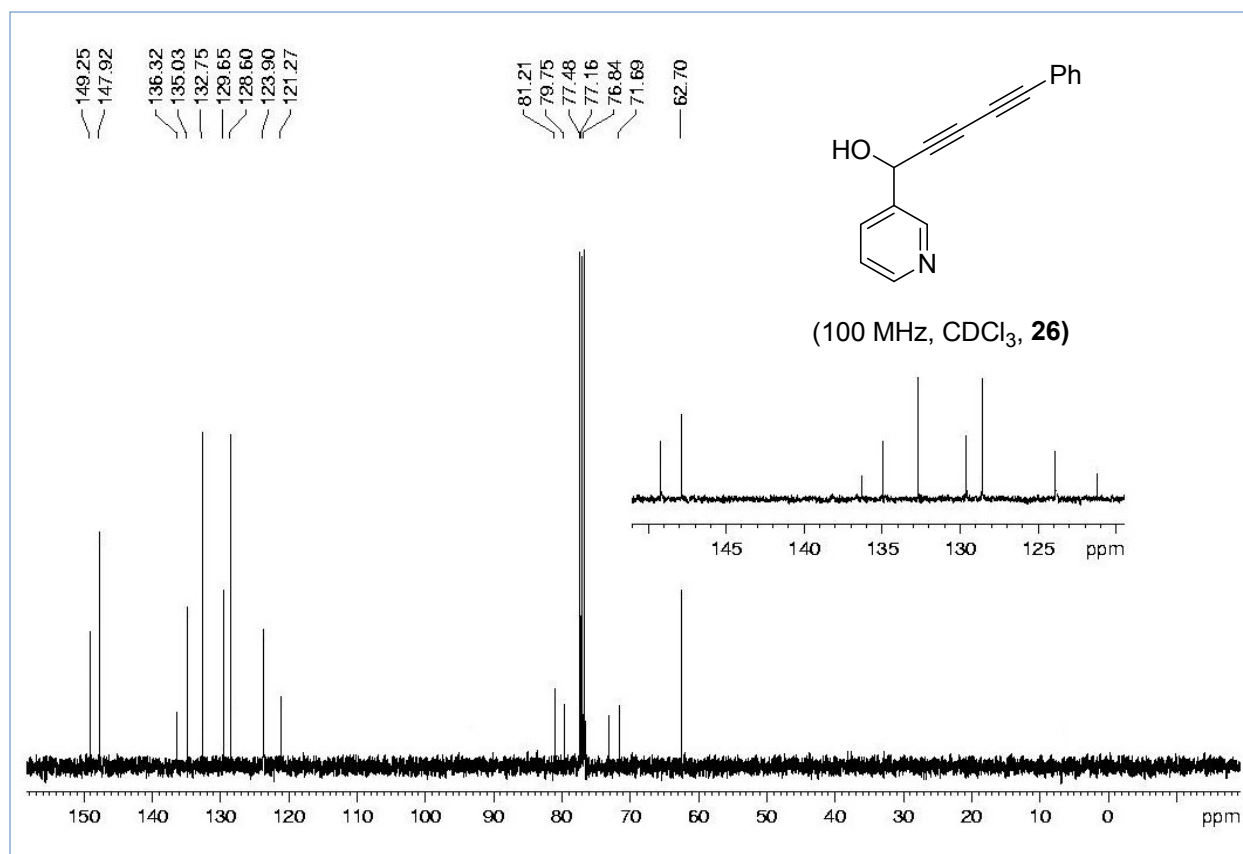

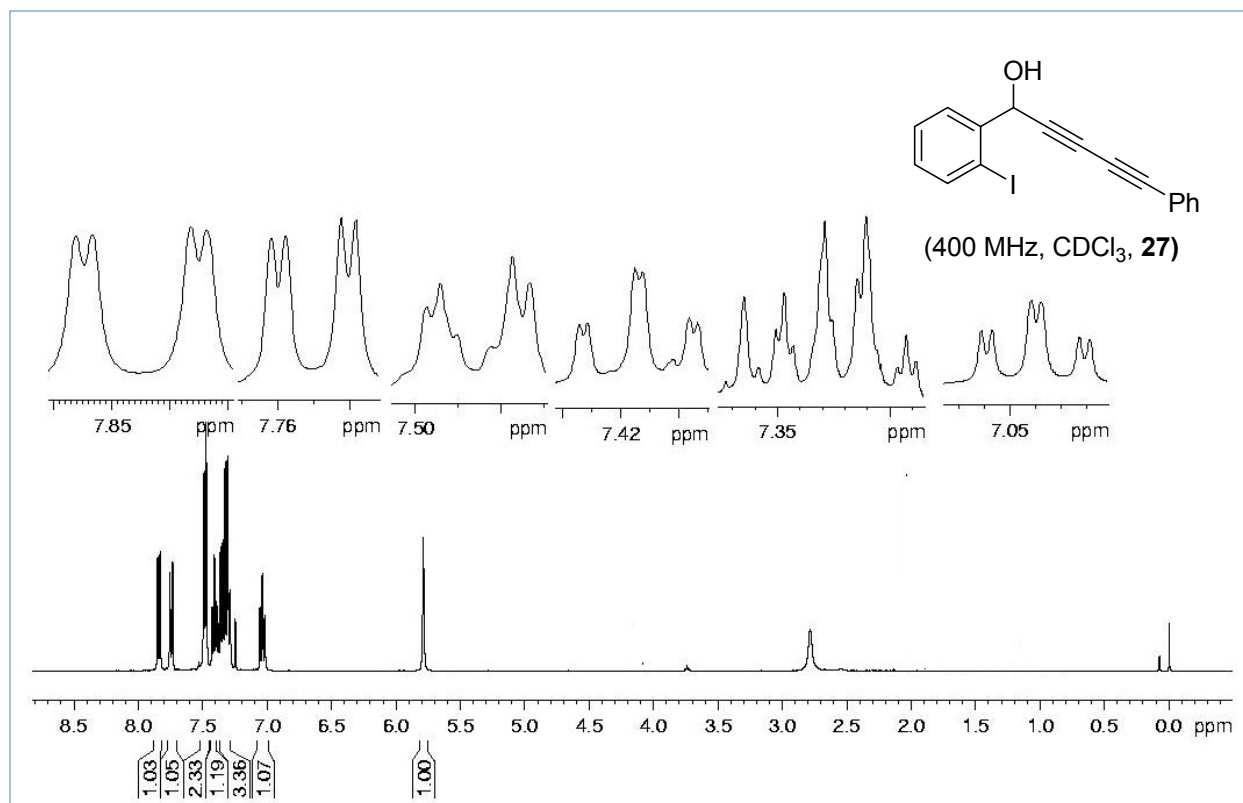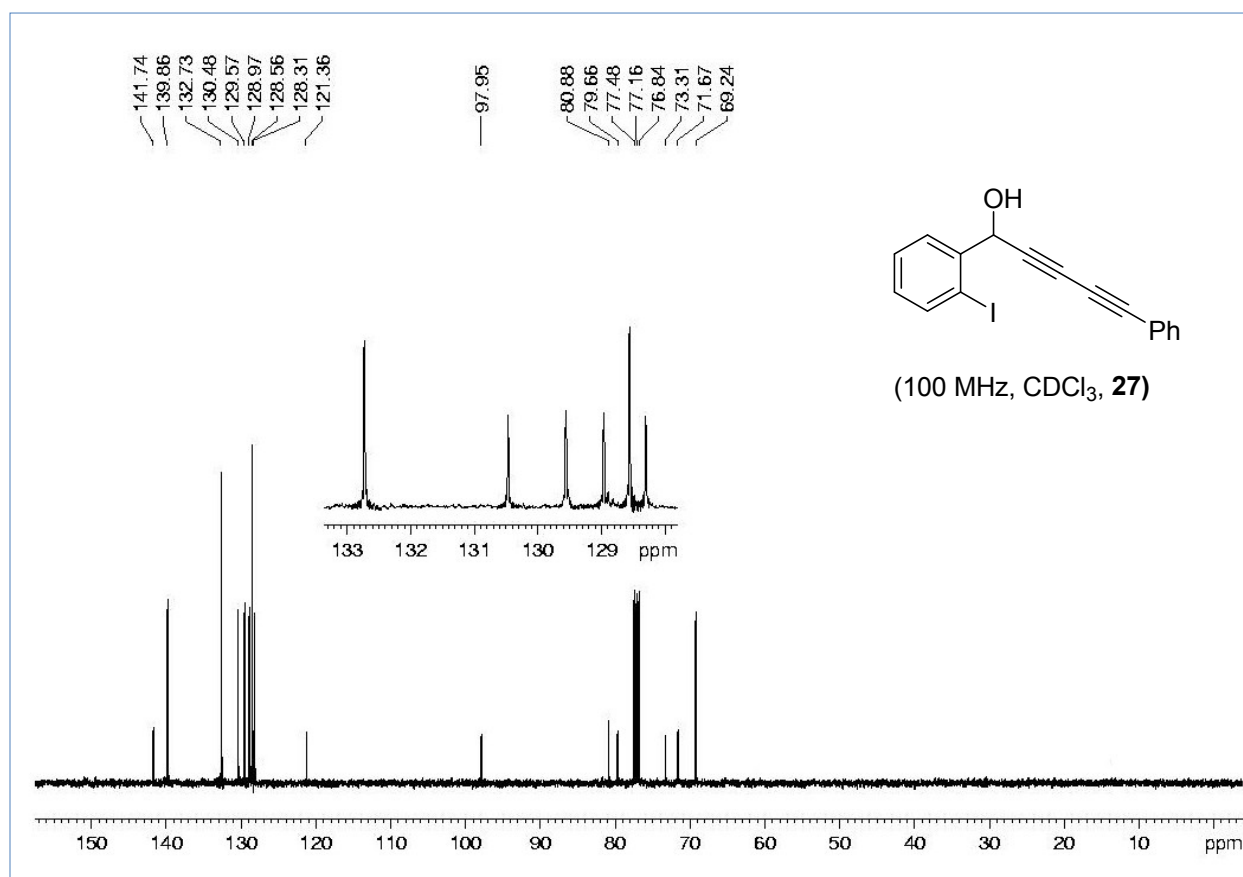

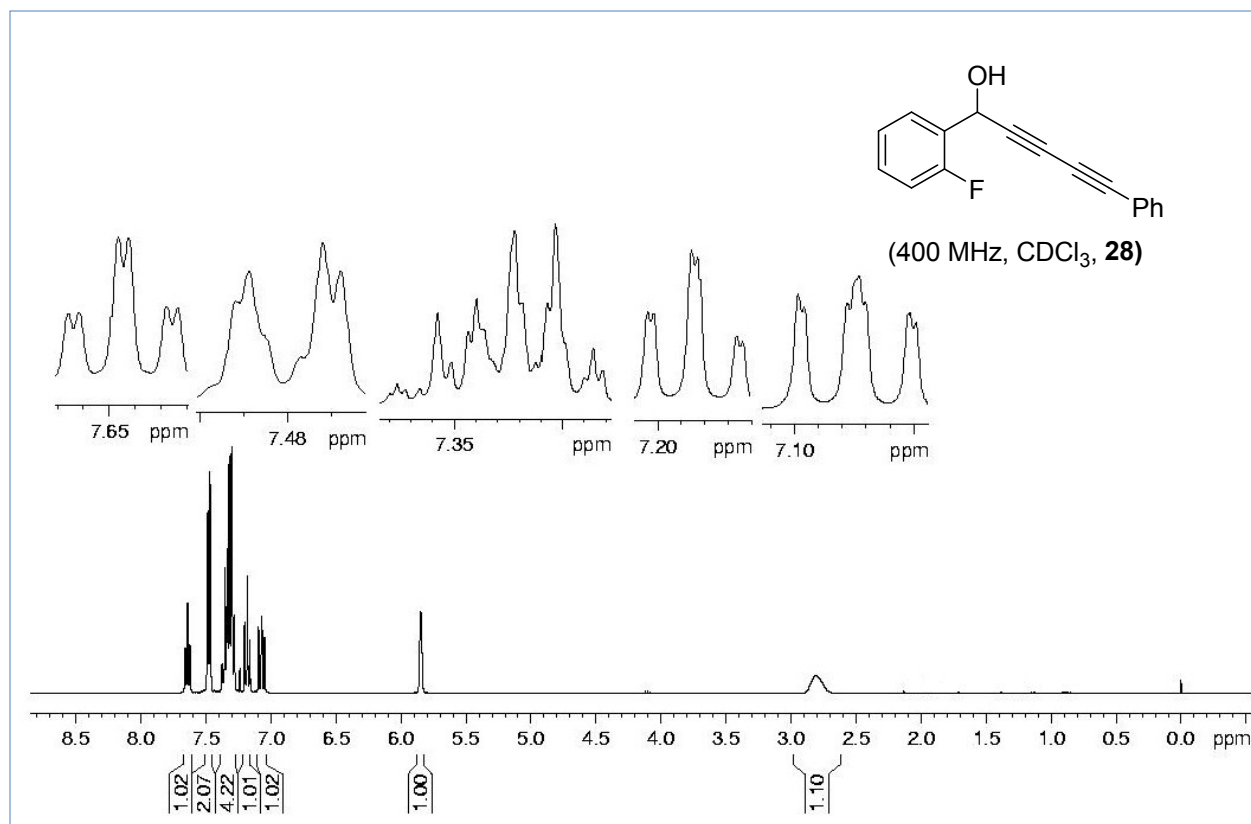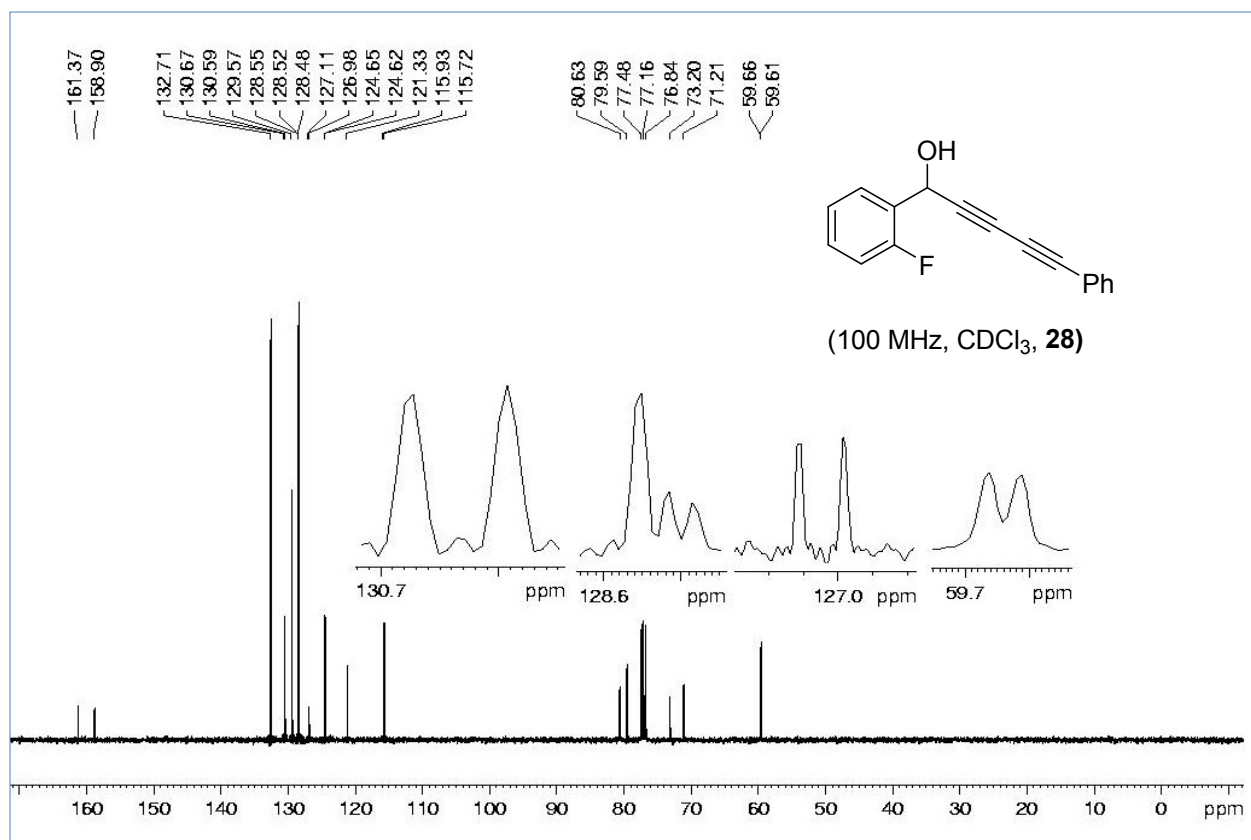



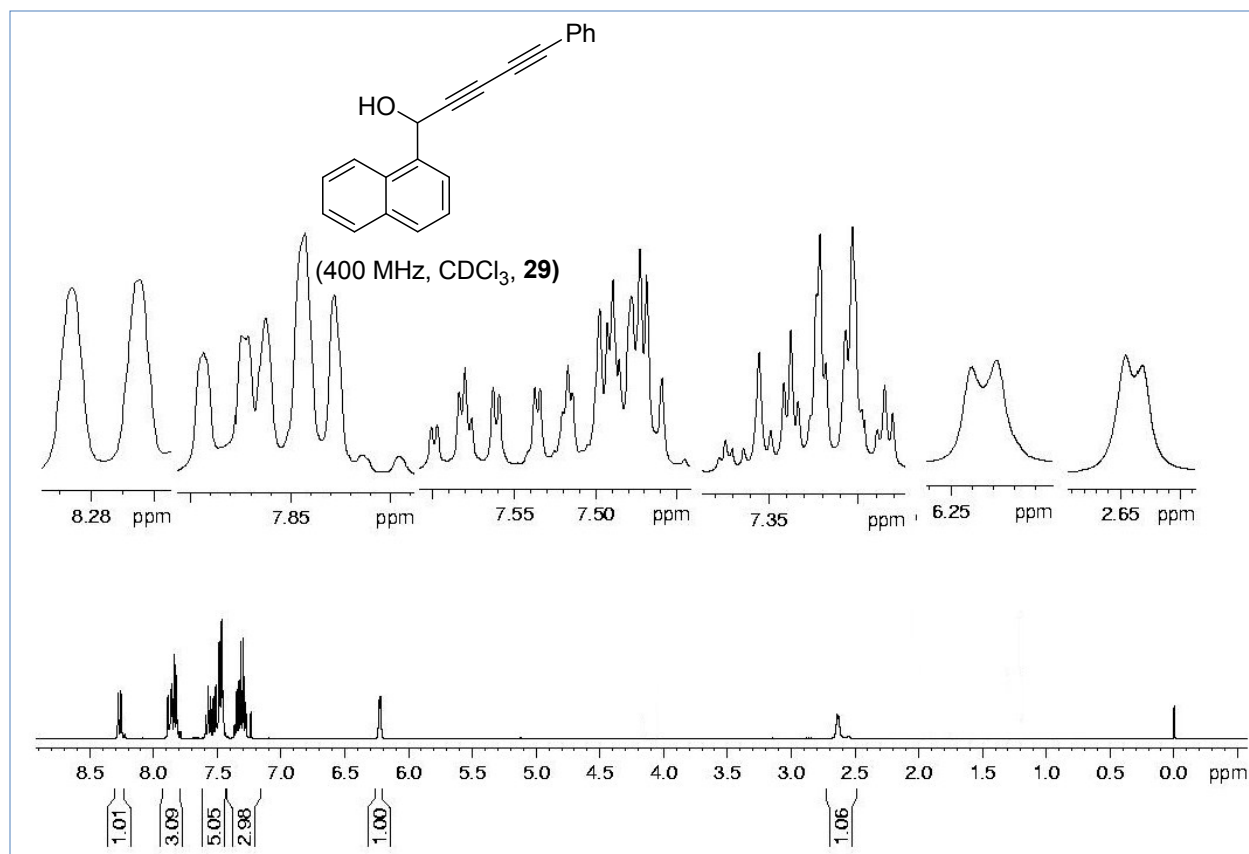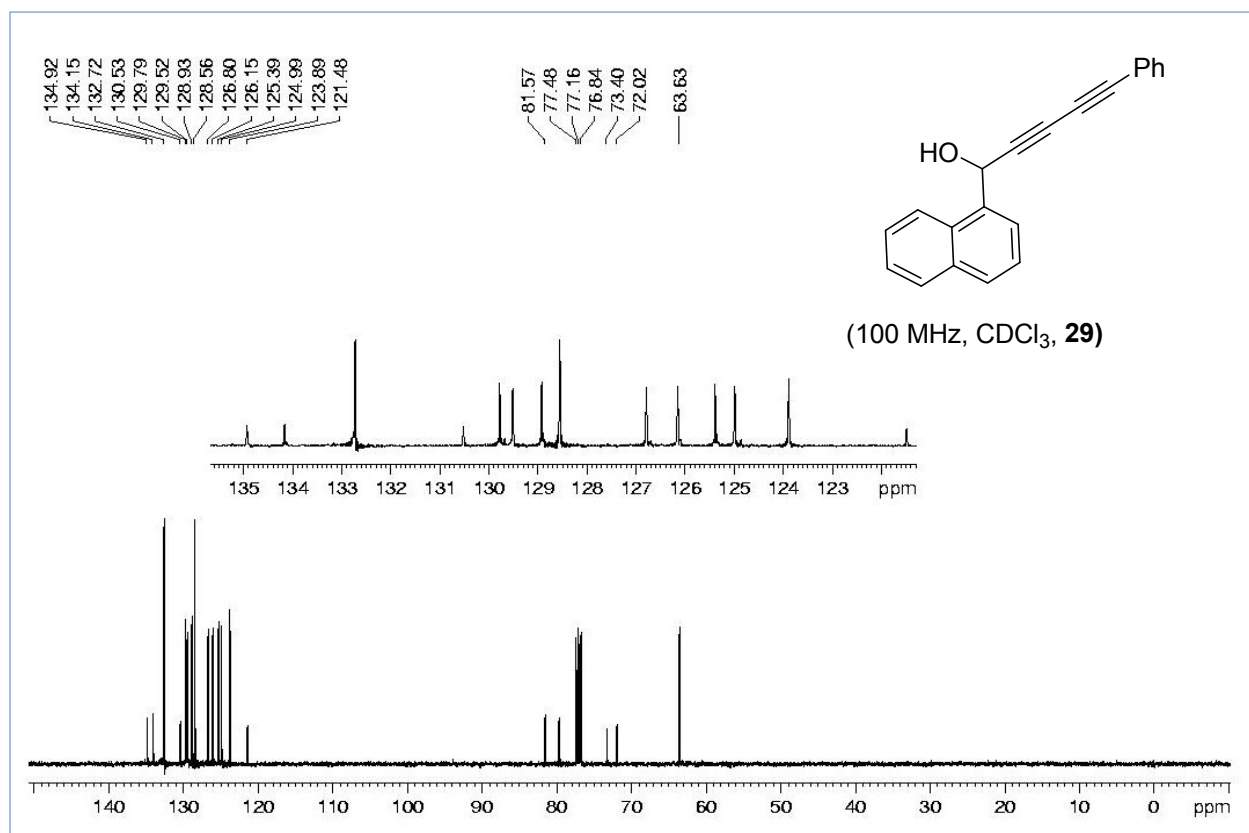

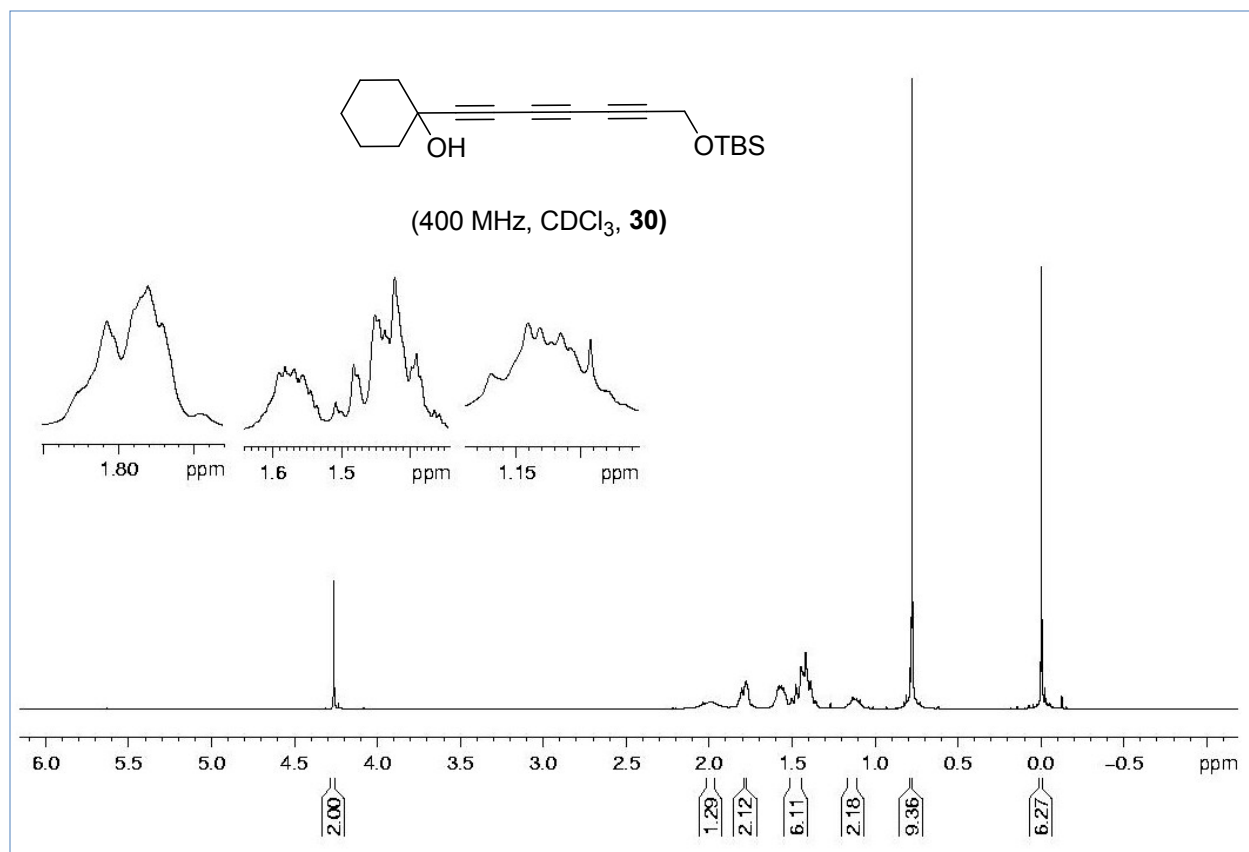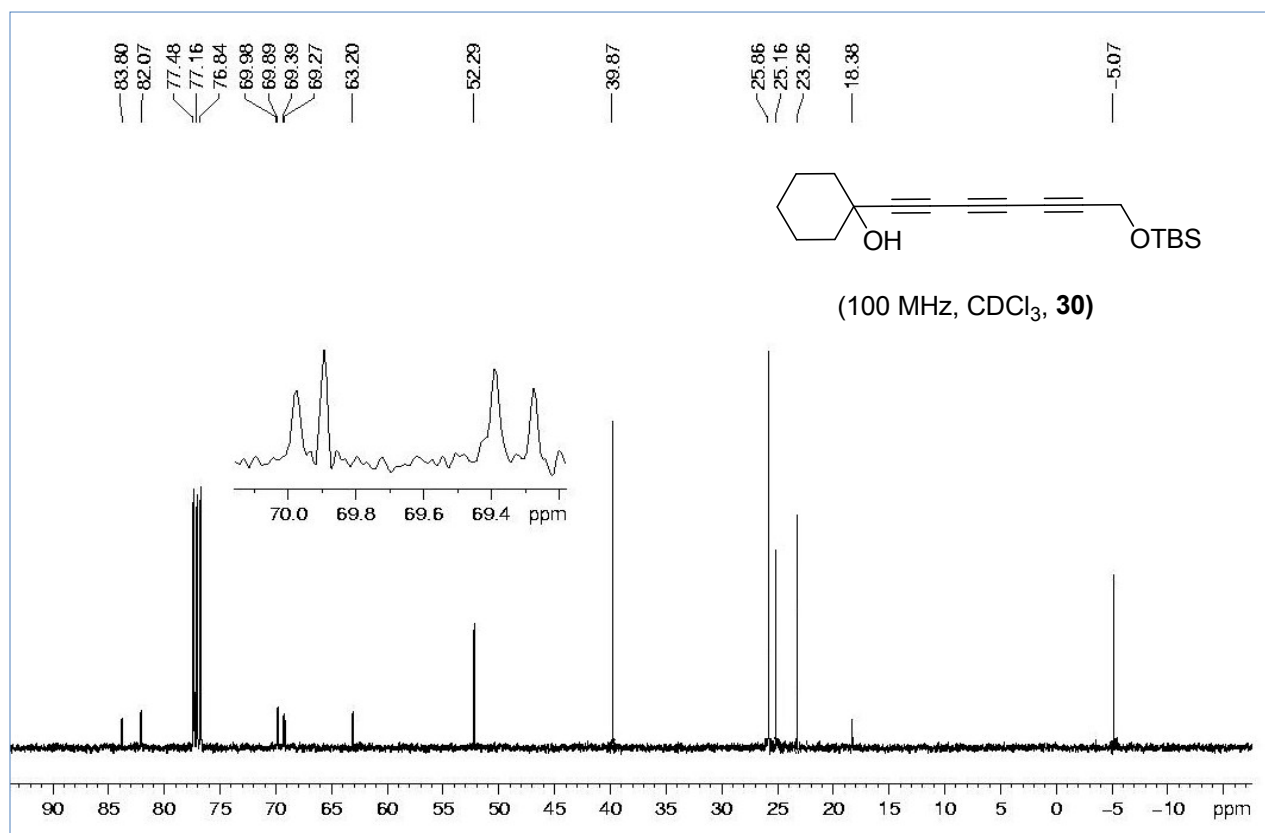

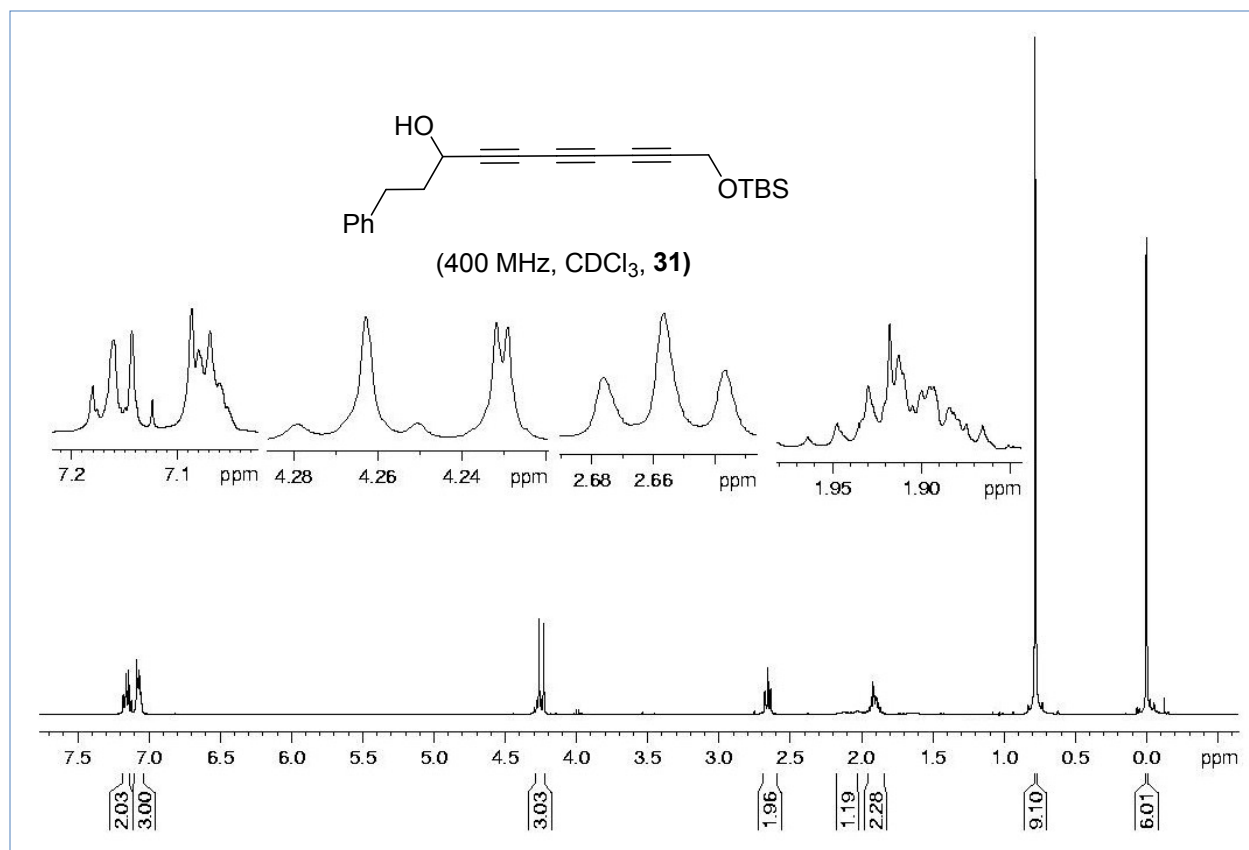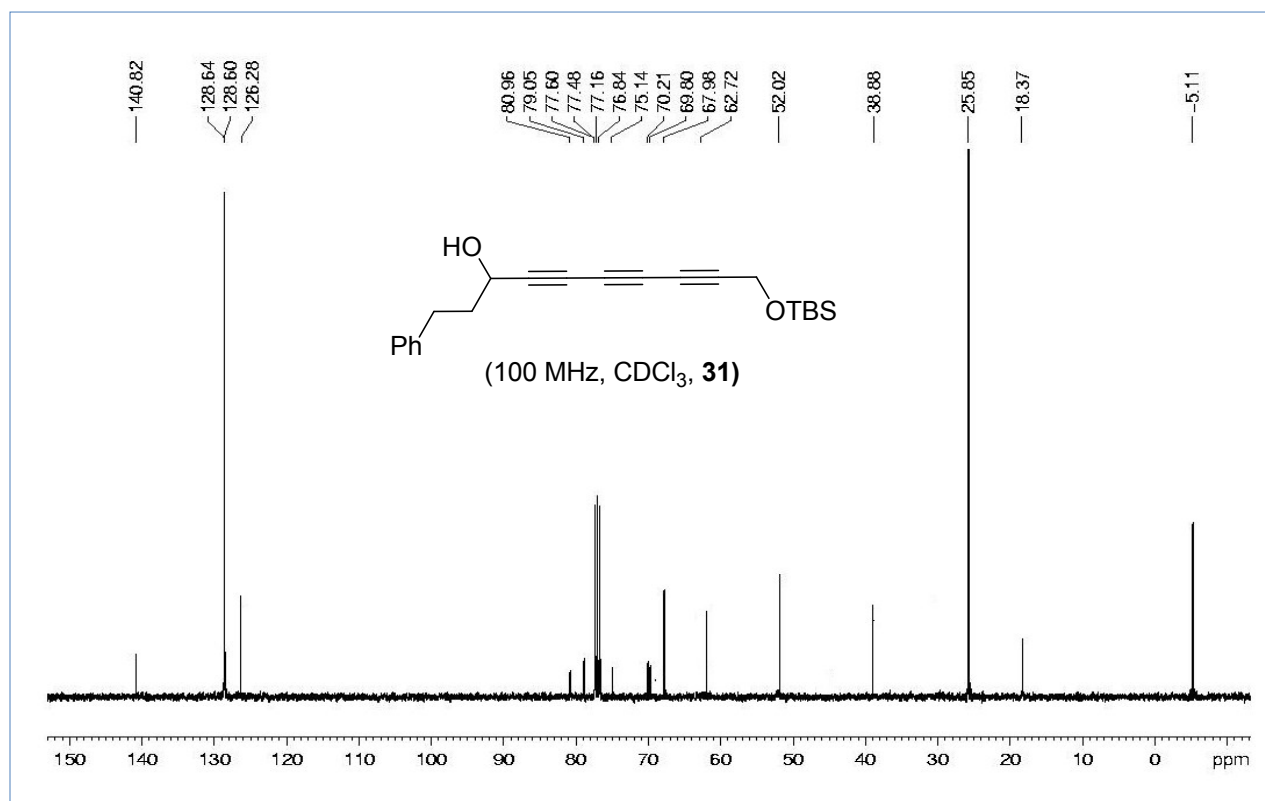



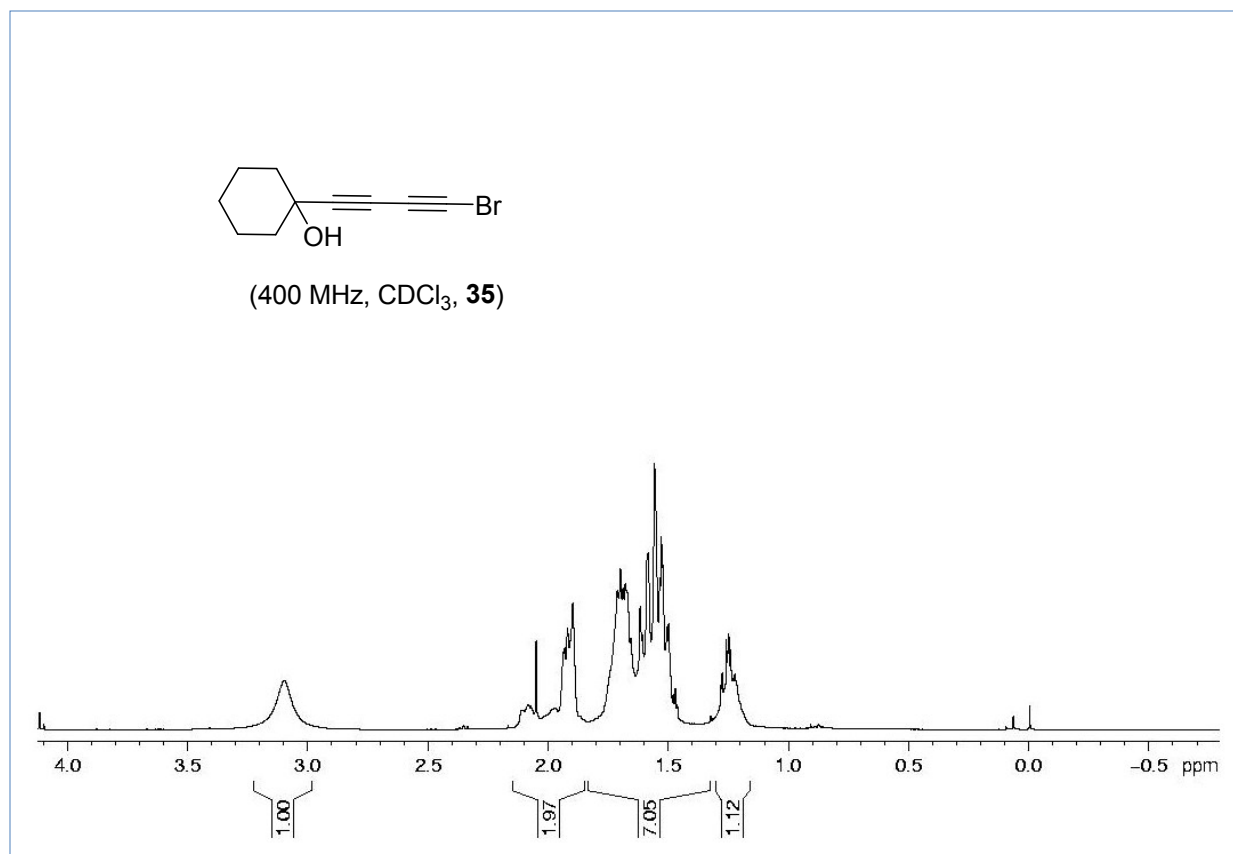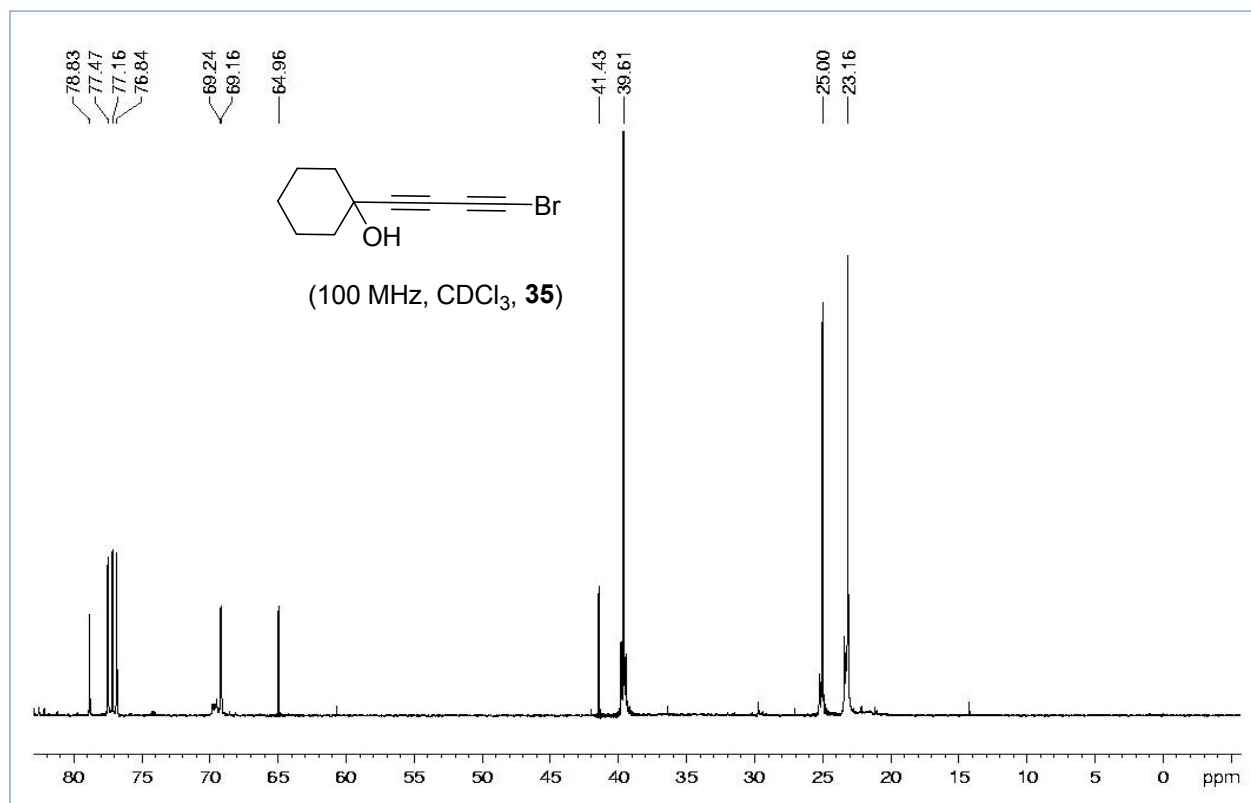

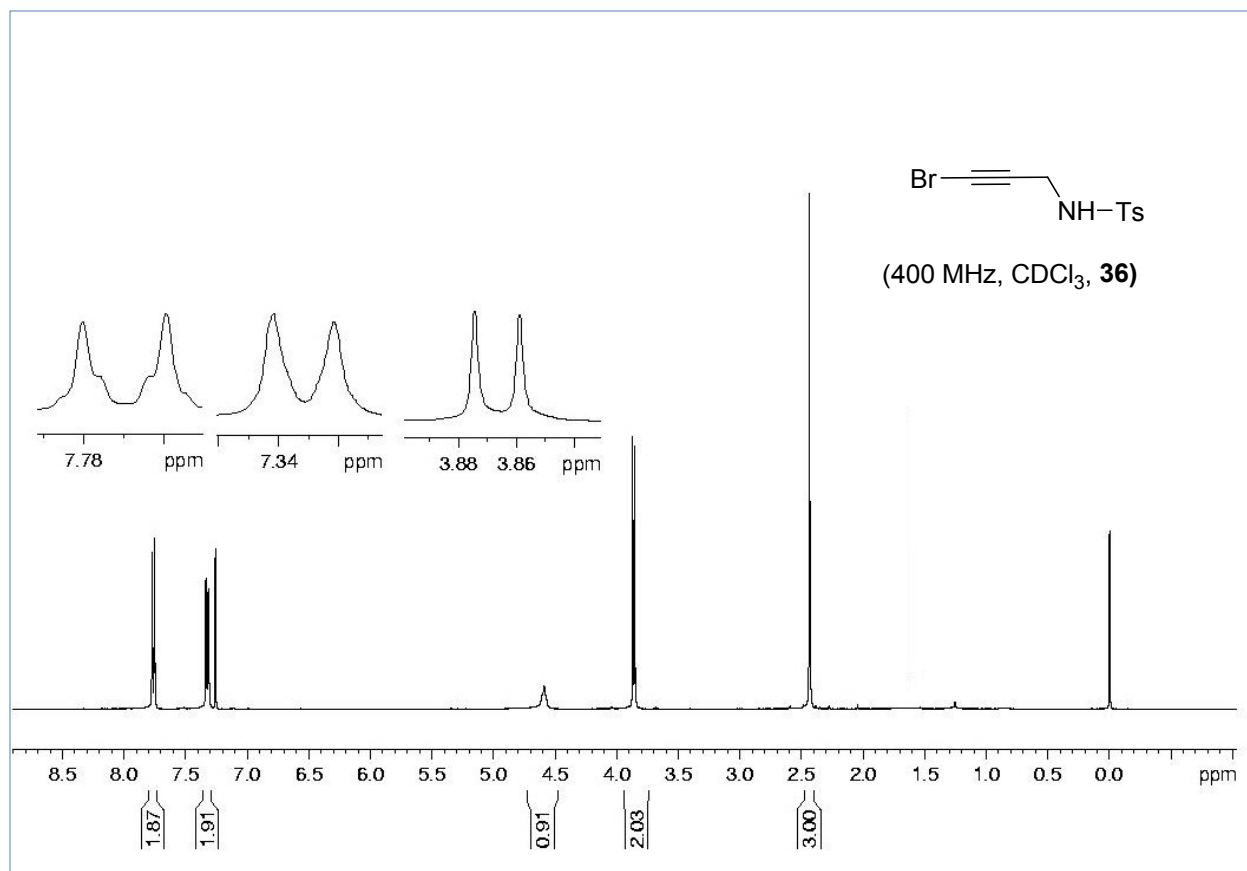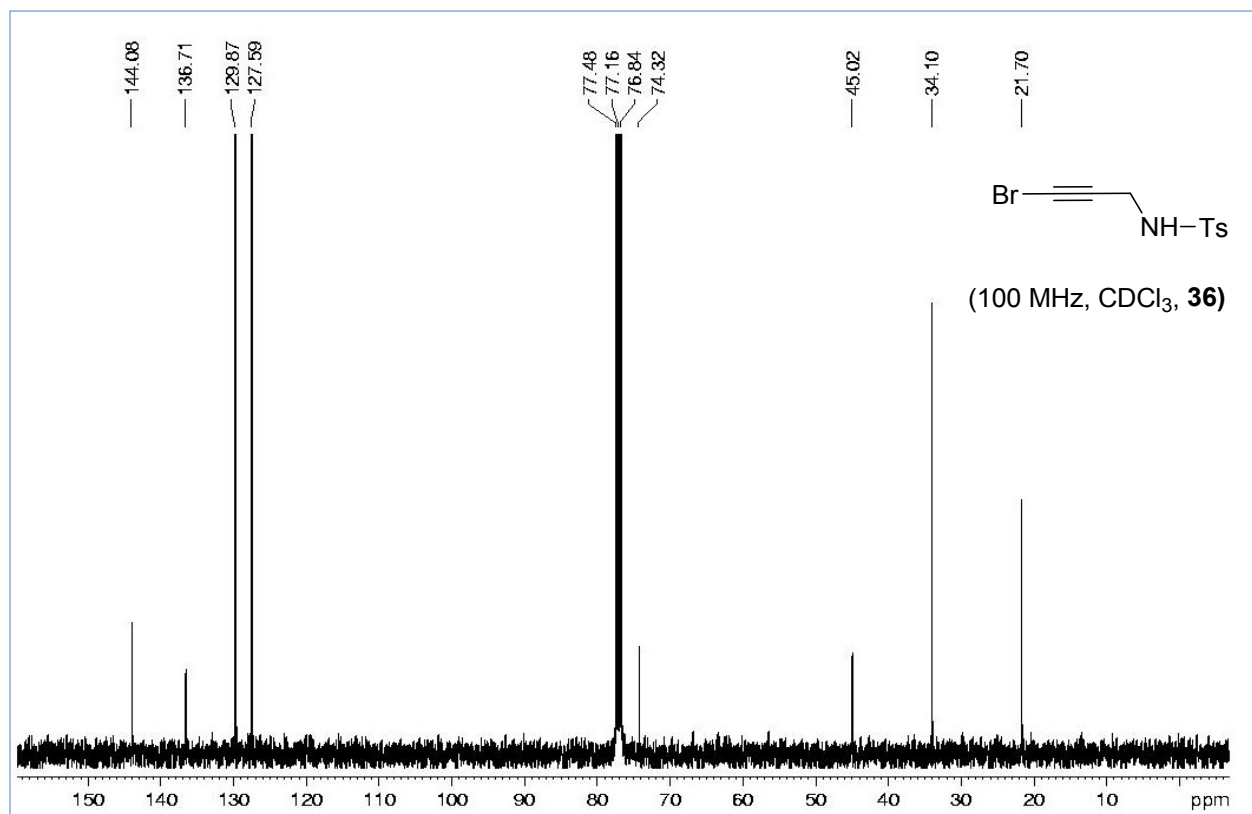

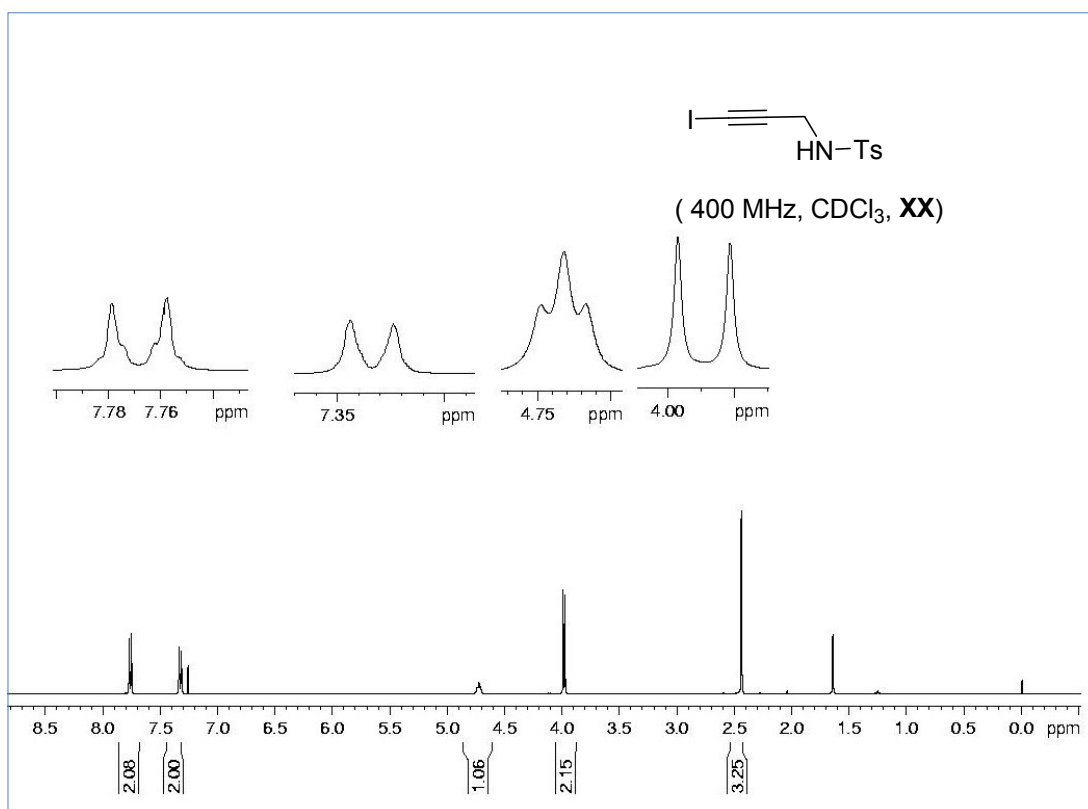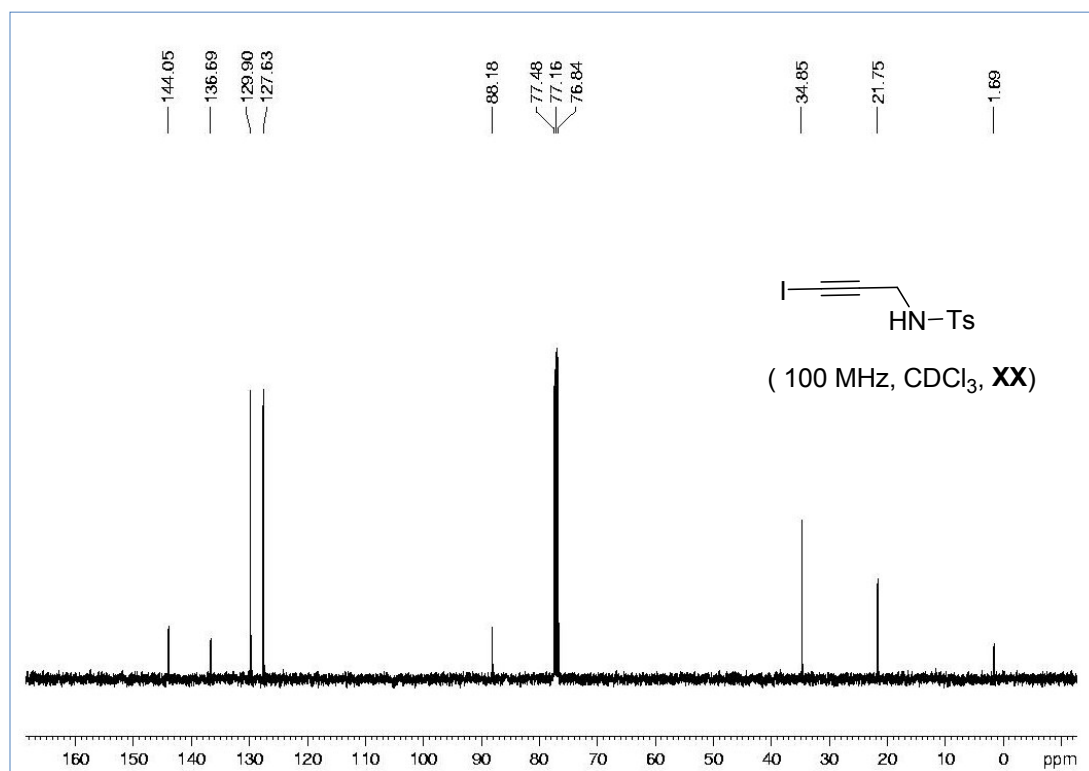

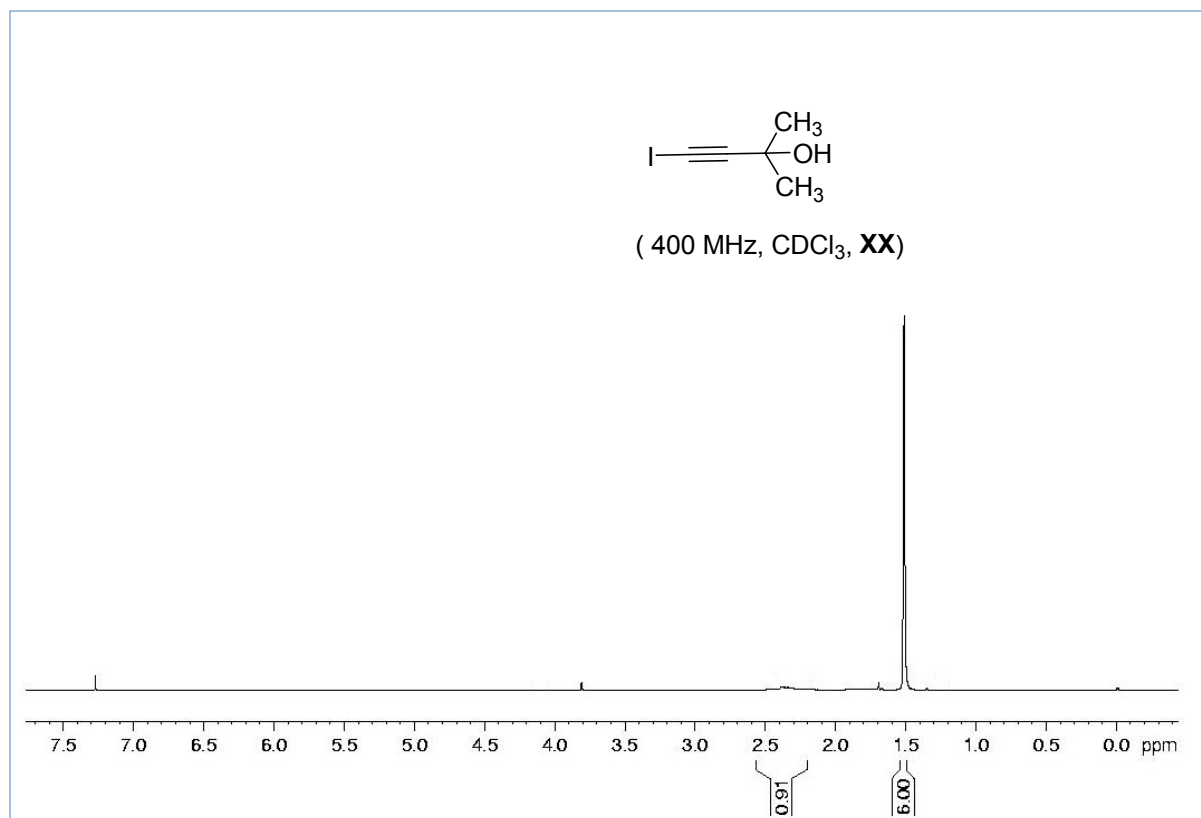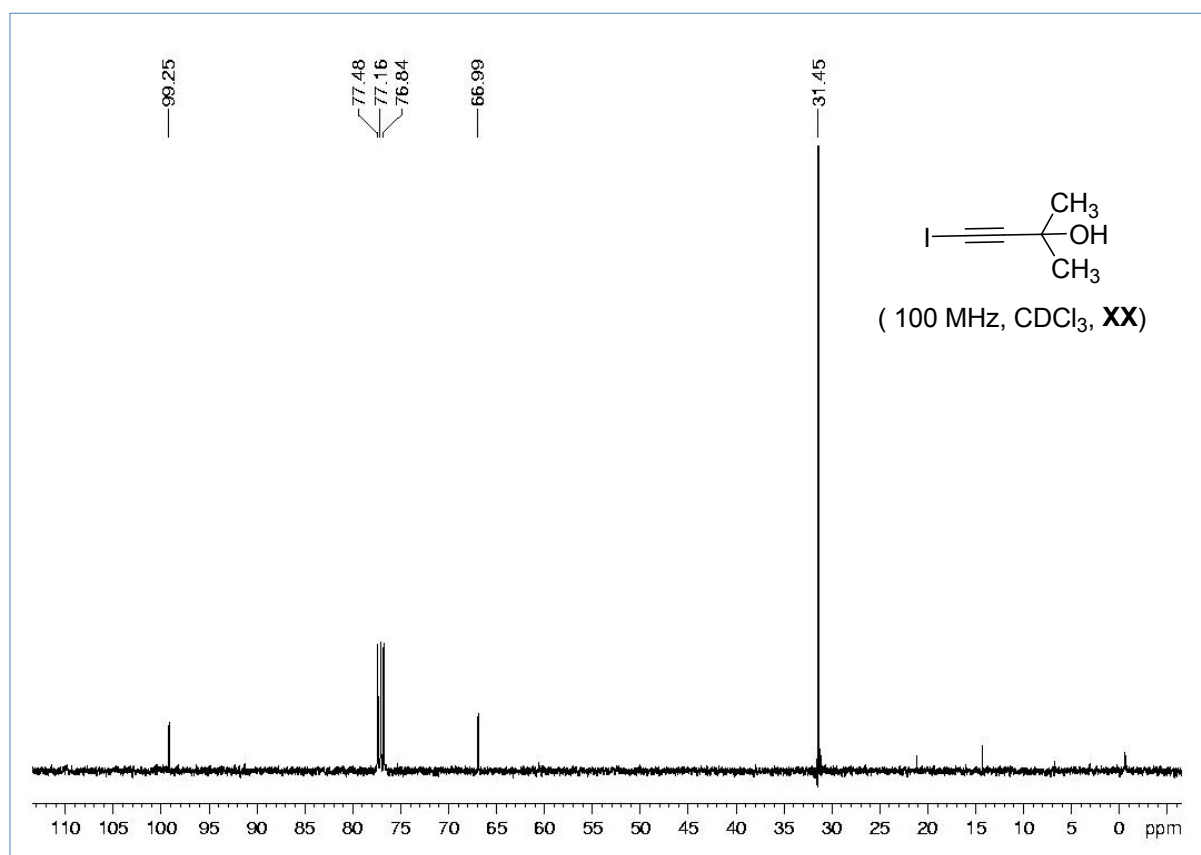



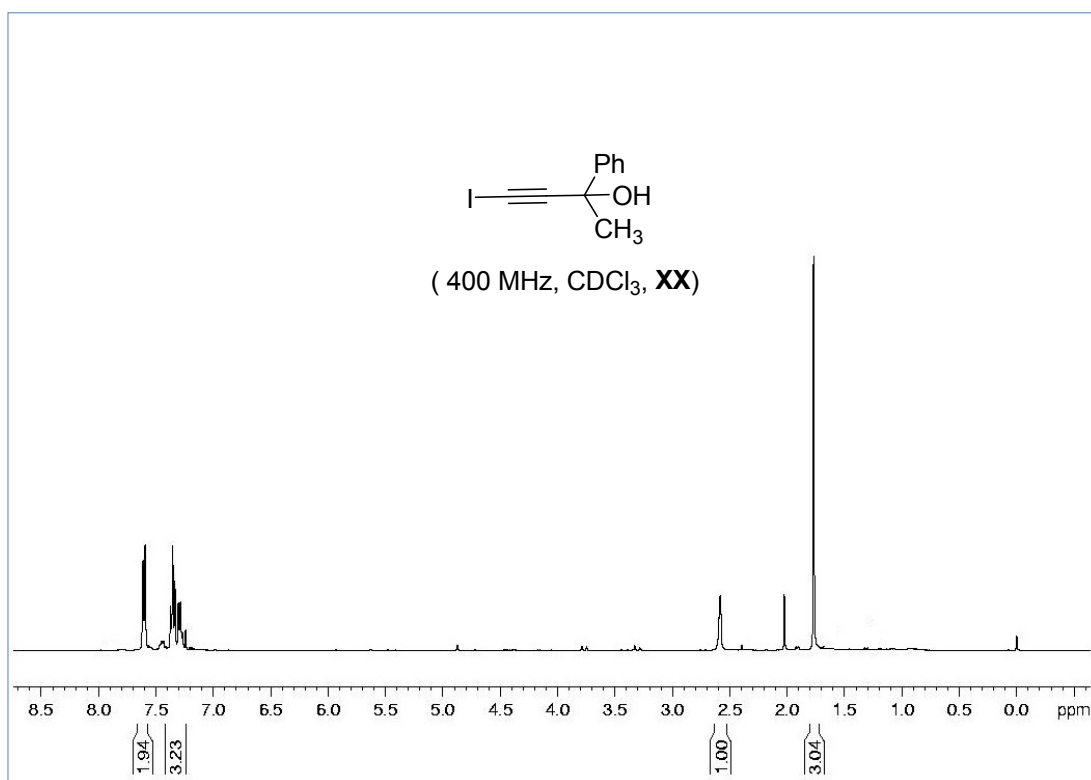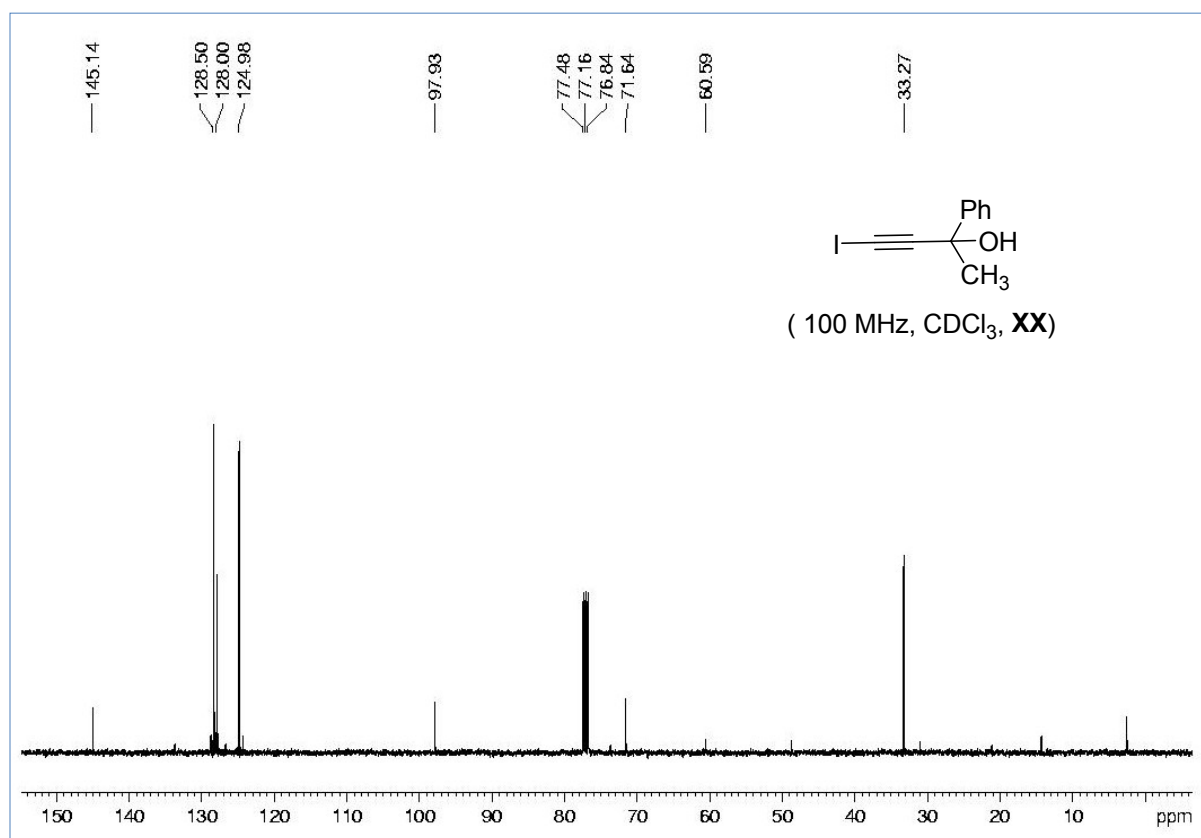

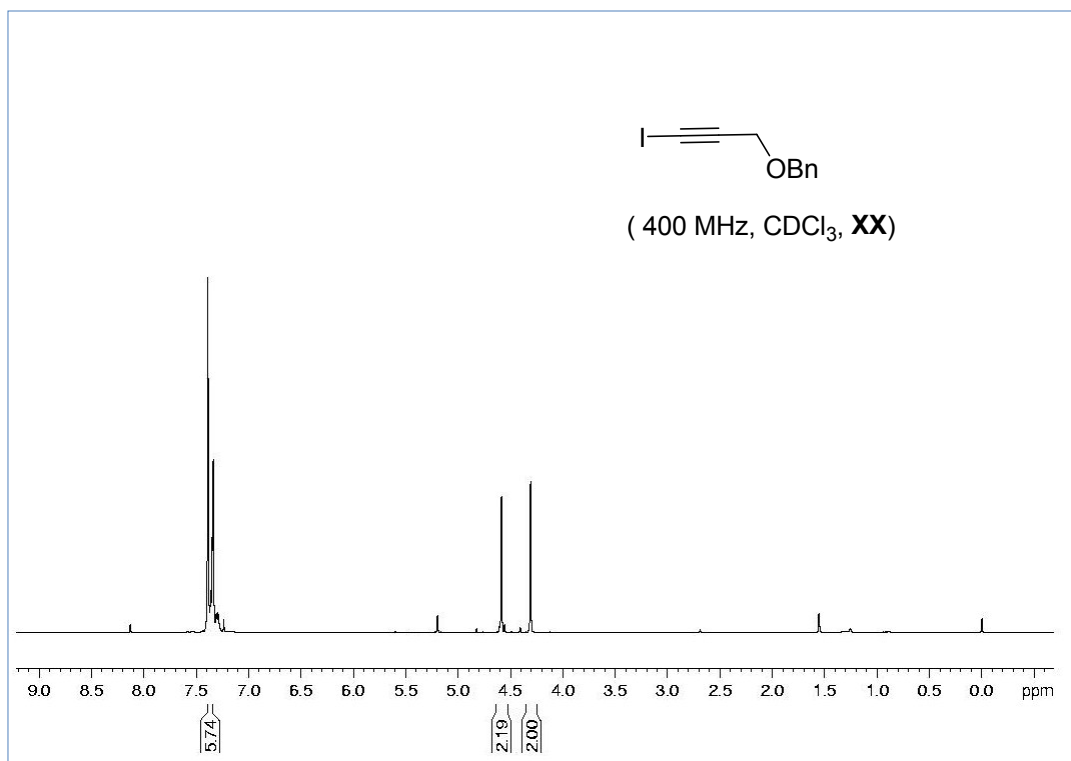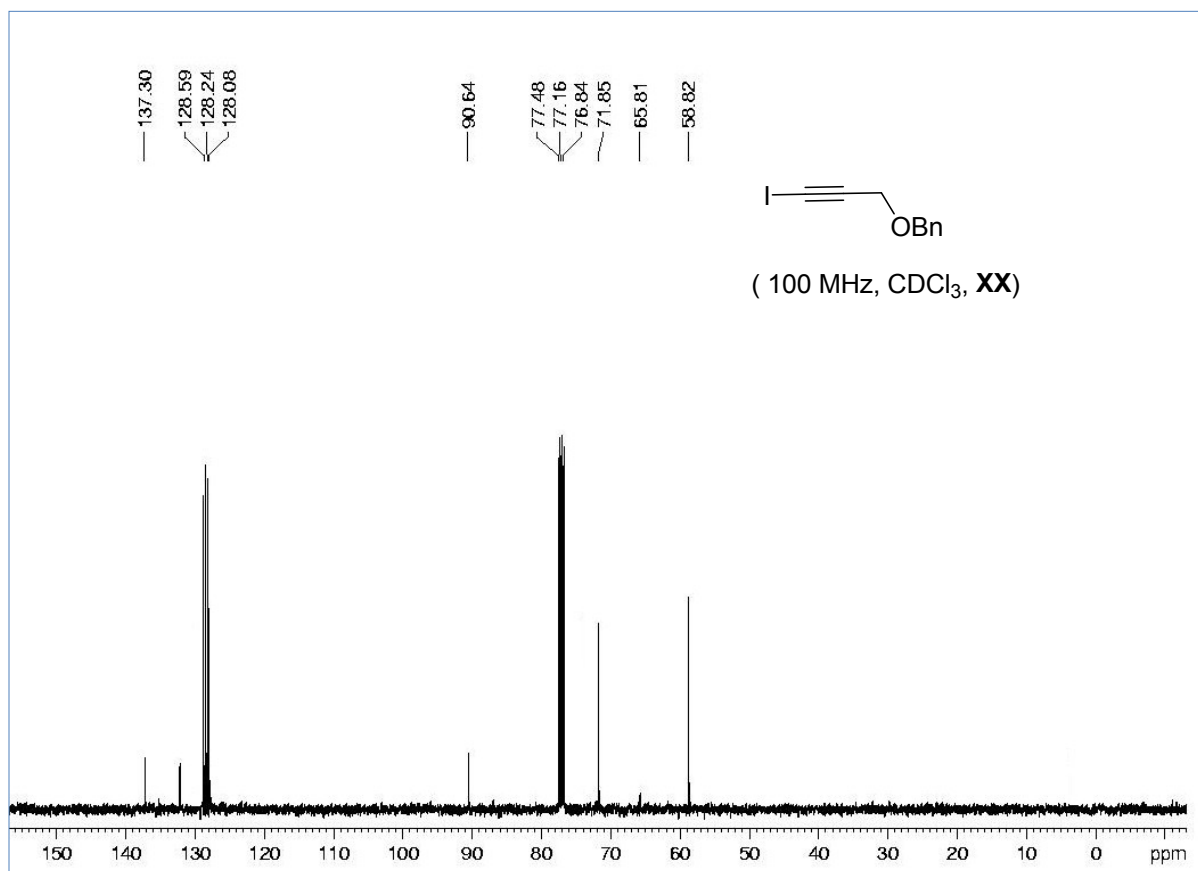

Supplement: c6ra07308e1.pdf [file c6ra07308e1.pdf]
